# Supplementary material for: A calibrated optogenetic toolbox of stable zebrafish opsin lines
Source: eLife. 2020 Mar 27;9:e54937. doi: 10.7554/eLife.54937 (PMC7170653; doi:10.7554/eLife.54937)
Supplement: Figure 2—source data 1. — Data provided as a XLSX file. [file elife-54937-fig2-data1.xlsx]

## Sheet: Figure 2F left
470 nm 5 ms pulse (response probability)	CheRiff
5	0	0	0	0	0	0.33	0	0	0.33	0.33	0	0.33	0	0	0.33	0	0	0	0	0.33	0	0	0.33	0	0.33	0.33	0	0	0	0	0	0	0	0.33	0	0	0	0	0.33	0	0	0	0	0.33	0	0	0	0	0
25	0	0	0	0	0	0.33	0	0	0.33	0	0	0.33	0	0.33	0.33	0.33	0.33	0	0	0	0	0	0	0	0	0.33	0	0	0	0	0	0	0.33	0.33	0.33	0	0	0.33	0.33	0.33	0	0	0	0	0	0.33	0	0	0
112	0	0	0	0	0	0	0	0	0	0	0	0	0.33	0.33	0.33	0	0	0	0	0	0	0	0	0.33	0	0.33	0	0.33	0	0	0	0	0.33	0	0	0.33	0	0	0.33	0	0.33	0	0	0	0	0	0	0	0
235	0	0	0	0	0.33	0	0	0.33	0.33	0	0	0	0	0	0	0.33	0.33	0.33	0	0	0	0	0	0	0	0	0	0.33	0	0	0	0	0	0	0.33	0	0	0	0	0	0	0.33	0	0	0.33	0	0	0.33	0
445	0	0.33	0	0	0	0	0.33	0	0	0	0	0	0	0.33	0.33	0	0	0	0	0	0	0	0	0	0.33	0	0.33	0	0	0.33	0.67	0	0.33	0.33	0	0	0	0	0	0	0.33	0	0	0	0	0.33	0.33	0	0
Irradiance μW/mm2
[truncated: 493 more columns]

## Sheet: Figure 2F left (inset)
470 nm 5 ms pulse (latency - ms)	CoChR
5
25
112	35	56	49.33	91.67	52.67	47	125.33	89.67	49.33	29.67	61.33	81.33	54.67	51	45	31.67	48.33	50.67	92	151	74	60	87.33	86.33	59.67	49.67	57.33	65.67	48	48	38	46.67	34.33	67.33	80	59.33	157	36	57	44.5	44.33	40	36	62.33	65
235	37	48.33	45	77	60.33	44.33	29.67	63	51	31	60.33	38.67	99.67	73	40	37.33	102	31.67	33	42.67	75.67	60	46	66.67	34	54.67	46.33	42.67	37	41.5	40.67	113.33	146	47.33	43.33	40.67	64.67	35	60	47.67	28	120	60.33	32	49.67	51	33	31.67	30
445	51.33	58.33	48	52	60.33	40	30.67	49	44	35.33	27.33	44	46.67	54	39	28	43	30.67	29.67	39	78.33	42	41.67	69.67	62.67	79	38.33	37.67	50.67	46.33	32	109	116	198	55.67	31	38.67	33.67	36.67	44.33	36.33	47.33	74	49	34	52.33	48	54.33	31.67
Irradiance μW/mm2
[truncated: 3 more columns]

## Sheet: Figure 2F middle
470 nm 5 ms pulse (response probability)	CheRiff
5	0.33	0	0	0.33	0	0.33	0	0	0	0	0	0	0	0	0	0	0	0	0	0	0	0	0	0.33	0	0	0	0	0	0	0.33	0.33	0.67	0	0.33	0	0	0.33	0	0.33	0	0	0	0	0	0	0	0	0
25	0.33	0	0	0	0	0	0.33	0	0	0	0	0	0	0	0.33	0	0	0	0	0	0	0	0	0	0	0	0	0	0	0	0	0	0	0	0	0	0	0	0	0	0	0	0.33	0	0.33	0	0	0	0.33
112	0.33	0	0	0	0	0.33	0	0	0.33	0	0.33	0	0	0	0	0.33	0.67	0	0	1	0	0.33	0	0	0	0	0	0	0	0	1	0.33	0.67	1	0	0.67	0	0	0.33	0	1	1	0	0	0	0.33	0.67	0	0
235	0	0	0	0.67	0	1	1	1	0.33	0.33	1	0	0.33	0	0	0	1	0	1	1	1	1	0.67	1	0	0	0	1	0.33	0	1	1	1	1	1	1	0	0.67	1	0	1	1	0	1	0.33	1	1	1	0
445	0.33	1	0	1	0	1	1	1	0	0.67	1	0	0.67	0.33	0	0.33	1	1	1	1	0.67	1	1	1	0	0	0	1	1	0	0.67	1	1	1	1	1	0	1	1	1	1	0.67	0	1	1	1	1	1	1
Irradiance μW/mm2
[truncated: 493 more columns]

## Sheet: Figure 2F right
590 nm 40 ms pulse (response probability)	CheRiff
4.5	0	0	0	0	0	0	0	0	0.33	0.33	0	0	0	0	0	0.33	0	0	0	0	0	0	0	0	0	0.33	0.33	0.33	0	0	0	0	0	0.33	0	0	0	0	0	0	0	0.67	0	0	0	0	0	0	0.33
19	0	0	0.33	0	0	0.67	0	0.33	0	0	0.33	0	0.33	0	0	0	0.67	0	0	0.67	0	0.33	0.33	0.33	0.33	0	0.67	0	0	0	0.33	0	0	0.33	0	0.67	0	0.33	0.33	0.33	0	0.33	0.33	0	0	0	0.33	0	0.67
107	0.67	0	0	0	0	0	0.33	0	0.33	0	0	0	0	0	0.33	0.33	0	0.33	0.33	0	0	0	0	0	0	0	0.33	0	0	0	0.33	0	0	0.33	0	0	0.33	0	0.33	0	0.33	0	0.33	0	0.33	0.33	0	0	0
246	0	0	0	0	0.33	0.33	0.33	0	0.67	0	0.33	0.33	0	0	0.33	0.33	0.67	0	0	0.33	0	0	0	0	0	0.33	0.33	0	0	0.33	0	0	0	0	0	0	0.33	0	0	0	0.33	0	0	0	0.33	0	0	0	0.33
322	0	0.33	0	0	0	0.33	0	0	0.33	0	0	0	0	0	0.33	0.33	0.33	0	0	0	0	0.67	0	0	0	0.33	0.33	0	0	0	0.33	0	0.33	0	0	0	0	0	0.33	0	0	0	0	0	0.33	0	0.33	0.33	0.33
Irradiance μW/mm2
[truncated: 530 more columns]

## Sheet: Figure 2G left
470 nm 5 ms pulse (response probability)	CheRiff																								CoChR
5	0	0	0	0	0.333333	0	0	0.333333	0	0	0	0	0	0.333333	0	0	0	0.333333	0	0	0	0	0	0	0	0	0	0	0	0	0	0	0	0	0	0	0.333333	0	0	0	0.333333	0.333333	0	0	0	0	0.333333	0	0
25	0	0	0.333333	0	0	0	0.333333	0	0	0.333333	0	0	0	0	0	0	0	0	0	0	0	0	0	0	0	0.666667	0.333333	0.333333	0.333333	0	0.333333	0	0	0.333333	0.333333	0	0	0.666667	0	0.333333	0	1	0.666667	0.666667	0.333333	0.333333	0.333333	0	0.333333
112	0.333333	0	0.333333	0	0.333333	0	0	0	0	0	0	0.333333	0	0	0	0	0	0	0.333333	0	0	0	0.333333	0	0.666667	1	1	0.666667	1	0	1	1	0.666667	1	1	1	1	1	1	0.666667	1	1	1	0.666667	1	1	1	0.333333	1
235	0	0	0.333333	0	0	0.333333	0	0	0	0	0.333333	0	0	0.333333	0	0.333333	0	0	0	0	0	0	0	0	0.333333	1	1	1	1	0	1	1	0.666667	1	1	1	1	1	1	1	1	1	1	1	1	1	1	0	1
445	0	0.333333	0	0	0	0	0.333333	0.333333	0	0.333333	0	0	0	0	0	0	0	0	0	0.333333	0	0	0	0	1	1	1	0.666667	1	0	1	1	1	1	0.666667	1	0.666667	1	1	0.666667	1	1	1	1	1	1	1	0.333333	1
Irradiance μW/mm2
[truncated: 467 more columns]

## Sheet: Figure 2G left (inset)
470 nm 5 ms pulse (latency - ms)	CoChR
5
25	161.5	146	170	157	165	127	130	140	181	159	148.5	179.5	163	112	174	107	134	158	137	190	193	157	86	182	149	105.5	144	180	150	162.667	95.3333	158	129	105.667	88.3333	101.5	129	128	119	103	176	143	113	107.5	144.5	169	63	62	128
112	137.5	129.333	108	184.5	69	108.333	86.6667	157.5	134.667	81.3333	161	95.3333	62.6667	64.3333	182	150.667	76.3333	94	129.5	46	80	117	65	74.6667	77.3333	56.6667	55	145	123	98.5	89.6667	115.667	174	131.667	127	125.667	141.333	116	128.333	62	133	111.333	103.667	89.3333	156	69	58.6667	158	92.6667
235	126	133	71	152	70.6667	68.3333	88.6667	64	71.6667	55	72.3333	83.6667	84	53.3333	119	106	70.6667	64.3333	101	77	78	79.6667	92	70	57.3333	61	112.667	90.3333	71	65.3333	67.6667	117.333	113.333	170	96.5	77.6667	97.6667	69	65.6667	125.667	76.6667	108.667	78.6667	57.3333	61.6667	72.3333	59.3333	66.3333	95.3333
445	84	84.3333	59	93.5	37.3333	70.6667	90	78	81.6667	88.5	75.3333	87	42	59.6667	162.5	107.333	54.3333	60.3333	78.3333	45.6667	74.3333	97.3333	96	64.3333	88.6667	97	50.6667	105	135	89	76.6667	103.333	134	61.3333	111.5	100.333	82.6667	58.6667	110.667	62	44.6667	84.3333	61.6667	69.6667	82	56	68	76.3333	63.6667
Irradiance μW/mm2
[truncated: 72 more columns]

## Sheet: Figure 2G middle
470 nm 40 ms pulse (response probability)	CheRiff																				CoChR
5	0	0	0	0	0	0	0	0	0	0	0	0	0	0	0	0	0	0.333333	0	0	0.666667	0.333333	0	0	0.333333	0.333333	0	0	0	0	0.333333	0.333333	0.666667	0.666667	0	0	0.666667	0.666667	1	0	1	0	0	0	0	0.333333	0.333333	0.333333	0
25	0	0	0	0	0	0	0.333333	0	0	0	0	0	0	0.333333	0	0	0	0	0	0	0.333333	1	1	1	0	0.666667	1	0.666667	1	1	1	1	1	1	0.666667	1	1	1	0.666667	1	1	1	0	0.666667	1	1	1	1	1
112	0	0	0	0	0.333333	0.333333	0	0.333333	0	0	0	0.333333	0	0	0	0	0	0	0	0	1	1	0.666667	1	0.333333	1	1	1	1	1	1	1	0.666667	1	0.666667	1	1	1	1	1	1	1	0	0.666667	1	1	1	1	1
235	0	0	0.666667	0	0	0.333333	0.333333	1	0	0.333333	0	0.333333	0	0.333333	0	0	0	0.333333	0.333333	0	1	1	1	1	0	0.666667	1	1	1	1	1	1	1	1	1	1	1	1	1	1	1	0.666667	0	1	1	1	1	1	1
445	0.333333	0.333333	0.333333	1	0.333333	0	0.333333	1	0.333333	0.666667	0.333333	0	1	0.333333	0.333333	0.333333	0.333333	1	0.333333	1	1	1	1	1	0.333333	1	1	0.666667	1	1	1	1	1	0.666667	1	1	1	1	1	1	1	1	0	1	1	1	0.333333	1	1
Irradiance μW/mm2
[truncated: 462 more columns]

## Sheet: Figure 2G right
590 nm 40 ms pulse (response probability)	CheRiff																												CoChR
4.5	0.333333	0	0.333333	0	0	0.333333	0	0	0	0.333333	0	0	0	0	0	0	0	0	0	0	0	0	0	0	0	0	0	0	0	0	0	0	0	0.333333	0	0	0.333333	0	0.333333	0	0	0	0	0.333333	0	0	0.333333	0	0
19	0.333333	0	0	0.333333	0.333333	0	0	0	0	0	0	0	0	0.333333	0	0	0	0.333333	0	0	0	0.333333	0	0	0.333333	0	0	0	0	0	0	0.333333	0	0	0	0	0	0.333333	0	0.333333	0	0	0	0	0	0	0	0	0
107	0.333333	0	0	0	0	0.333333	0	0	0	0	0	0	0	0	0.333333	0	0	0	0	0	0.333333	0	0	0	0	0	0.333333	0	0	0	0.333333	0	0	0	0	0	0	0	0	0	0	0	0	0	0	0.333333	0.666667	0	0
246	0	0	0.333333	0.333333	0	0	0.333333	0.333333	0.333333	0	0.333333	0	0.333333	0	0	0	0	0	0	0	0	0	0	0	0	0	0	0	0	0	0.333333	0	0	0	0.666667	0.333333	0	0	0	0	0	0	0	0	0.333333	0	0	0.333333	0
322	0	0	0	0.333333	0	0	0	0.666667	0	0	0.333333	0.333333	0.333333	0.333333	0	0	0	0.333333	0	0	0	0	0	0.666667	0	0.333333	0	0	0.333333	0.333333	0	0	0	0	1	0.333333	0.666667	0	0.333333	0.333333	0.333333	0.333333	0	0	0	0	0	0	0
Irradiance μW/mm2
[truncated: 471 more columns]
