# Supplementary material for: A calibrated optogenetic toolbox of stable zebrafish opsin lines
Source: eLife. 2020 Mar 27;9:e54937. doi: 10.7554/eLife.54937 (PMC7170653; doi:10.7554/eLife.54937)
Supplement: Figure 3—source data 1. — Data provided as a XLSX file. [file elife-54937-fig3-data1.xlsx]

## Sheet: Figure 3F left
459 nm 2 ms pulse (response probability)	CheRiff																		CoChR																		ChR2(H134R)
0.038853	0	0	0	0	0	0	0	0	0	0	0.333333	0	0	0	0	0	0	0	0	0	0	0	0	0	0	0	0	0	0	0	0.333333	0.333333	0	0	0	0	0	0	0	0	0	0	0	0	0	0	0.333333	0	0
0.634368	0	0	0	0	0	0	0	0	0	0	0	0	0	0	0	0	0	0	1	1	1	1	1	1	1	1	1	1	1	1	0.333333	1	1	1	1	1	0	0	0	0	0.333333	0	0	0	0.666667	1	0.666667	0	1
1.31434	0	0	0	0	0	0	0	0	0	0	0	0	0	0	0	0	0	0	1	1	1	1	1	1	1	1	1	1	1	1	0.666667	1	1	1	1	1	0	1	1	1	1	1	1	1	1	1	1	1	1
1.847	0	1	0	0	0	0	0.333333	0	0	1	0.666667	0	0	1	0.333333	0.666667	0.666667	0	1	1	1	1	1	1	1	1	1	1	1	1	1	1	1	1	1	1	1	1	1	1	1	1	1	1	1	1	1	1	1
2.557	1	1	0.333333	0	0	0	1	0	0	1	0.666667	0.666667	0	0.666667	0.666667	1	0.666667	0	1	1	1	1	1	1	1	1	1	1	1	1	1	1	1	1	1	1	1	1	1	1	1	1	1	1	1	1	1	1	1
Irradiance mW/mm2
[truncated: 103 more columns]

## Sheet: Figure 3F middle
459 nm 10 ms pulse (response probability)	CheRiff																		CoChR								ChR2(H134R)									Chronos
0.038853	0	0	0	0	0	0	0	0	0	0	0	0	0	0.333333	0	0	0	0	0	0	0	0	0	0	0	0	0	0	0	0	0	0	0	0	0	0	0	0	0	0	0	0	0	0	0	0	0	0	0
0.634368	0	0	0	0	0	0	0	0	0	0	0	0	0	1	0	0	0	0	1	1	1	1	1	1	1	1	0	0	1	0	0	0.666667	0.333333	1	1	0	0.333333	0	0	0	0	0	0	0	0	0	0	0	0
1.31434	0	1	0	0	0	0	0.333333	0	0	1	1	0	0	1	0.333333	1	0.333333	0	1	1	1	1	1	1	1	1	1	1	1	0.333333	1	1	0.666667	1	1	0	1	1	0	0.333333	0.333333	0	0	0	0	1	0	0	0
1.847	1	1	0.333333	0	0	0	1	0	0	1	0.666667	0.333333	0	1	1	0.666667	0.333333	0	1	1	1	1	1	1	1	1	1	1	1	0.666667	1	1	1	1	1	1	1	0	1	0.666667	1	0	0	0.333333	0.666667	1	1	1	1
2.557	1	1	0	0	0.666667	0	0.666667	1	0	1	1	0.666667	0	1	1	1	1	0	1	1	1	1	1	1	1	1	1	1	1	1	1	1	1	1	1	1	1	1	1	1	1	0	0.333333	1	1	1	1	1	1
Irradiance mW/mm2
[truncated: 38 more columns]

## Sheet: Figure 3F right
617 nm 10 ms pulse (response probability)	CheRiff									CoChR														ChR2(H134R)																Chronos
0.0390486	0	0	0	0	0	0	0	0	0	0	0	0	0	0	0	0	0	0	0	0	0	0	0	0	0	0	0	0	0	0	0	0	0	0	0	0	0	0	0	0	0	0	0	0	0	0	0	0	0
0.241446	0	0	0	0	0	0	0	0	0	0	0	0	0	0	0	0	0	0	0	0	0	0	0	0	0	0	0	0	0	0	0	0	0	0	0	0	0	0	0	0	0	0	0	0	0	0	0	0	0
0.633503	0	0	0	0	0	0	0	0	0	0	0	0	0	0	0	0	0	0	0	0	0	0	0	0	0	0	0	0	0	0	0	0	0	0	0	0	0	0	0	0	0	0	0	0	0	0	0	0	0
0.887317	0	0	0	0	0	0	0	0	0	0	0	0	0.333333	0	0	0	0	0	0	0	0	0	0	0	0	0	0	0	0	0	0	0	0	0	0	0	0	0	0	0	0	0	0	0	0.333333	0	0	0	0
0.998128	0	0	0	0	0	0	0	0	0	0	0	0	0	0	0	0	0	0	0	0	0	0	0	0	0	0	0	0	0	0	0	0	0	0	0	0	0	0	0	0	0	0	0	0	0	0	0	0	0
Irradiance mW/mm2
[truncated: 52 more columns]

## Sheet: Figure 3G left
459 nm 2 ms pulse (response latency - ms)	CheRiff											CoChR																		ChR2(H134R)
0.038853
0.634368												6	6	6.66667	5.33333	2	2.66667	2.66667	7.33333	6	2	2.66667	2.66667	20	3.33333	10	3.33333	2.66667	5.33333	16	20	12	32	23.3333	12	20	22	21	16	20	20
1.31434												4	5.33333	8.66667	6	2	4.66667	2.66667	2.66667	5.33333	2	4.66667	4	17	3.33333	4.66667	2	2	4	7.33333	22	6.66667	4	12	5.33333	4.66667	6	18	3.33333	6.66667	4	4	4.66667	6	4.66667	4	6	3.33333	3.33333
1.847	8	16	11.3333	15	5.33333	16	9	9				6.66667	5.33333	8	4.66667	2	4	2.66667	2	4.66667	2	4	2	13.3333	2	2	2.66667	3.33333	5.33333	2	4.66667	2.66667	3.33333	8.66667	4.66667	6	7.33333	4.66667	8	4.66667	9.33333	6.66667	4	10.6667	4	7.33333	4	10	2.66667
2.557	7.33333	2	28	10	2.66667	11	8	2	11	2	9	4.66667	4.66667	8	5.33333	2	5.33333	4.66667	6.66667	3.33333	2	3.33333	2.66667	13.3333	4	2	3.33333	3.33333	3.33333	6	7.33333	2	5.33333	4	12	18.6667	2	10.6667	8	6	8.66667	5.33333	3.33333	8	8	4	4	8.66667	10.6667
Irradiance mW/mm2
[truncated: 32 more columns]

## Sheet: Figure 3G middle
459 nm 10 ms pulse (response latency - ms)	CheRiff												CoChR								ChR2(H134R)									Chronos														ChrimsonR
0.038853
0.634368													2.66667	4.66667	5.33333	2.66667	2.66667	2	2.66667	2	17.3333	13	28	6.66667	24
1.31434	8.66667	12	8	13.3333	5.33333	16	5.33333	12					2.66667	4	7.33333	2.66667	2	3.33333	8	2.66667	16	9.33333	4.66667	12	4.66667	6.66667	10	2.66667	2.66667	6.66667	10.6667	8	12	2.66667	5
1.847	9.33333	3.33333	26	14	4.66667	8	6	2.66667	13.3333	5	22		2	3.33333	3	2	2	3.33333	10.6667	2	23.3333	8	6	13	7.33333	6	8.66667	7.33333	4	8.66667	6.66667	15.3333	7	7.33333	14	5	4	14.6667	6	7.33333	4			19.3333	10	15.3333	13.3333	25	18
2.557	6	2.66667	20	10	16.6667	2.66667	6.66667	11	3.33333	8	8.66667	5.33333	2	2.66667	2.66667	2.66667	2	2	8	2.66667	14.6667	6	2	16	6	2.66667	8	4	4	4.66667	3.33333	4	7.33333	6	6	14	6.66667	4	2	2	2.66667	5.33333	4	24	17.3333	22	12	16	22.6667
Irradiance mW/mm2
[truncated: 4 more columns]

## Sheet: Figure 3G right
617 nm 10 ms pulse (response latency - ms)	ChrimsonR
0.0390486
0.241446
0.633503	15.3333	20	24	32	22.6667	28.6667	20	16	32	14.6667	12	11.3333	24	20
0.887317	9.33333	14.6667	16	16	20.6667	16.6667	13.3333	11.3333	42	15.3333	12.6667	13.3333	20	14.6667	4	8	12	20	18	15.3333	16	22	12.6667	15.3333	15.3333
0.998128	7.33333	12	11	16.6667	16.6667	13.3333	13	12	12	14	18	16	18	12	4.66667	6	12.6667	24	19.3333	12.6667	15.3333	15	8.66667	13.3333	11.3333
Irradiance mW/mm2

## Sheet: Figure 3H left
459 nm 2 ms pulse (bout duration - ms)	CheRiff											CoChR																		ChR2(H134R)
0.038853
0.634368												185.333	239.333	430.667	67.3333	188	314	132.667	241.333	143.333	60.6667	70.6667	135.333	46	160	39.3333	36.6667	35.3333	124.667	34	25	46.6667	32	28.6667	192	42.6667	18	40	46	36	24
1.31434												140	40	341.333	76.6667	197.333	277.333	64.6667	314	135.333	96	101.333	113.333	103	66	171.333	43.3333	145.333	83.3333	85.3333	18.6667	39.3333	94	41.3333	162	88.6667	176	77.3333	182	57.3333	130	264	284	268.667	60	266	31.3333	43.3333	86.6667
1.847	144	12	121.333	85	144	176	31	106				109.333	51.3333	323.333	70	225.333	126	67.3333	221.333	54	95.3333	26.6667	108	20	95.3333	40	50	180.667	139.333	172.667	171.333	190	58.6667	151.333	48	67.3333	104	142.667	117.333	60	128	217.333	66.6667	210	290.667	158	138	39	57.3333
2.557	86.6667	216.667	398	22	96	51	48	167	109	170	23	210	61.3333	273.333	125.333	171.333	99.3333	71.3333	236.667	76.6667	128.667	42	83.3333	164.667	64	50	58	48	84	112	152.667	160.667	52.6667	123.333	398	105.333	187.333	84.6667	148	86.6667	54	130.667	70	150.667	128.667	107.333	45.3333	182.667	135.333
Irradiance mW/mm2
[truncated: 32 more columns]

## Sheet: Figure 3H middle
459 nm 10 ms pulse (bout duration - ms)	CheRiff												CoChR								ChR2(H134R)										Chronos														ChrimsonR
0.038853
0.634368													190.667	39.3333	54.6667	77.3333	125.333	96.6667	60	49.3333	80	29	28	32	164	20
1.31434	133.333	20	179.333	123.333	166	140	42	230					137.333	56	39.3333	86	153.333	148	375.333	42.6667	31.3333	145.333	152.667	24	118.667	139.333	26	290.667	214.667	152.667	182	26	222	80	45.3333	38
1.847	50.6667	181.333	154	27.3333	132	64	82	201.333	107.333	203	164		155.333	38.6667	50	60.6667	132.667	39.3333	228	45.3333	62.6667	56	209.333	45	85.3333	97.3333	40	70	120	112.667	37.3333	195.333	648.667	283	38.6667	108	111	131.333	103.333	72	24	41.3333			60	204	38	42	255
2.557	51.3333	178	144	30	96	152	76.6667	35	206	172.667	165.333	122.667	170.667	51.3333	244	50	230.667	41.3333	386	50	50	34.6667	225.333	28	58.6667	34.6667	33.3333	314	135.333	132.667	246	121.333	31.3333	738.667	242.667	41.3333	224	117.333	198.667	88.6667	152.667	83.3333	133.333	182	60	50	24.6667	65.3333	258
Irradiance mW/mm2
[truncated: 5 more columns]

## Sheet: Figure 3H right
617 nm 10 ms pulse (bout duration - ms)	ChrimsonR																									Visually-evoked bouts from opsin-negative fish
0.0390486
0.241446
0.633503	160	208	164	138	70	30	149	61.3333	218	88	44	93.3333	21	130
0.887317	169.333	100.667	148	62	47.3333	55.3333	176.667	130	154	120.667	66.6667	167.333	14	32.6667	130	109	182.667	14	26	65.3333	180	69	24.6667	92.6667	108
0.998128	145.333	43.3333	176	108	48.6667	90.6667	165	62.6667	129.333	76	143.333	67.3333	74	38	82	110	136.667	30	24	50.6667	138	116	92	48.6667	115.333
Irradiance mW/mm2																										264.476	320.545	230	202.533	209.806	205.455	126.19	194	231.111	303.4	354.421	328.235	159.263	322.087	414.167	349.333	266.6	233.714	226.167	340.444	261.59	222.103	269.15	225.412
[truncated: 15 more columns]

## Sheet: Figure 3I left
459 nm 2 ms pulse (tail angle - degrees)	CheRiff											CoChR																		ChR2(H134R)
0.038853
0.634368												30.7753	58.8393	72.2846	18.6149	30.7036	53.2234	19.7697	32.0823	14.4732	36.6536	21.2165	49.7224	1.14347	25.0568	3.68586	8.54535	15.0947	22.9857	0.926687	4.48897	4.24989	20.6739	7.55393	19.8508	1.09476	4.68503	5.29219	10.6221	29.8577	2.3558
1.31434												48.7449	10.1465	78.4122	32.545	22.2103	36.1852	15.1305	29.1379	8.5802	7.09774	31.157	27.8979	39.9301	18.159	16.647	16.6712	3.80487	27.9358	13.1929	9.40128	5.96552	21.2784	3.19407	23.4666	6.30395	46.6517	29.3902	4.90775	5.76475	41.6495	57.9955	60.827	34.1543	6.79795	9.73459	5.36407	6.37903	10.1983
1.847	23.8037	10.8002	75.8404	81.2727	41.5605	32.4793	4.59131	70.2487				56.5853	12.4801	85.8385	32.8456	46.8829	17.6346	25.9719	5.30938	9.57093	11.2145	12.3113	55.3116	44.1782	11.3098	3.04703	12.6391	17.2245	42.6363	32.1998	29.8298	43.027	34.4226	31.5166	10.8979	16.9527	32.0924	27.497	22.5	14.547	29.5062	27.2665	8.27477	37.8099	26.6168	19.5438	34.8504	21.3952	10.1839
2.557	31.4027	43.4594	11.1895	6.94844	37.2496	30.3996	32.7283	80.0064	62.3303	53.2657	13.9607	49.0135	18.4258	59.3949	35.5055	67.8192	7.21078	27.9939	86.139	9.1948	36.3715	14.8527	20.8574	35.8984	11.7979	3.0687	11.5028	18.094	26.2717	13.4577	41.3773	37.1957	31.0915	38.3125	13.7649	60.9055	19.7972	20.6136	11.2117	27.8511	16.5072	26.8595	8.49723	62.3074	24.2836	28.4093	1.56995	28.9973	17.4994
Irradiance mW/mm2
[truncated: 32 more columns]

[truncated: 14 more sheets: Figure 3I middle, Figure 3I right, Figure 3J left, Figure 3J middle, Figure 3J right, Figure 3K left, Figure 3K middle, Figure 3K right, Figure 3L, Figure 3M, Figure 3N, Figure 3O, Figure 3P, Figure 3Q]
