# Supplementary material for: A calibrated optogenetic toolbox of stable zebrafish opsin lines
Source: eLife. 2020 Mar 27;9:e54937. doi: 10.7554/eLife.54937 (PMC7170653; doi:10.7554/eLife.54937)
Supplement: Figure 4—source data 1. — Data provided as a XLSX file. [file elife-54937-fig4-data1.xlsx]

## Sheet: Fig 4B-G
Fig 4B	Membrane resistance values (MΩ)												Fig 4E	Peak photocurrent values (pA)
		Control	Cheriff	CoChR	Chr2	Chronos	ChrimsonR	GtACR2	GtACR1	eArch3.0	eNpHR3.0				Control 475nm	Control 575nm	Cheriff	CoChR	ChR2	Chronos	ChrimsonR
	Mean	154.83	144.958	114.526	148.351	141.526	102.571	161.325	104.248	158.837	116.754			Mean	4.05777	4.29439	10.2906	272.579	59.6152	43.4518	250.99
	St Dev	56.1161	12.9015	43.0587	53.1109	18.5943	34.5274	56.7663	28.6244	12.528	41.8547			St Dev	1.81305	2.08289	11.9346	277.995	67.1243	0.711045	72.8462
	n	7	3	12	8	3	11	7	16	3	19			n	10	12	11	14	15	3	7
		266.758	130.063	72.3608	141.433	152.749	96.7123	112.822	72.8845	145.049	145.59				3.01086	3.08935	37.3987	566.656	153.045	42.6314	366.419
		147.713	152.613	57.9284	106.285	120.062	75.2891	251.476	105.405	169.521	153.435				2.00013	2.20411	17.2353	692.404	85.8384	43.8888	276.831
		121.614	152.198	111.259	221.121	151.765	89.2344	203.627	64.6783	161.942	160.725				6.80964	3.84602	24.9681	424.5	68.8258	43.8354	166.84
		187.456		93.4929	233.226		86.6968	132.814	114.777		127.443				4.83642	2.36959		295.666	164.546		238.93
		138.212		66.6008	113.838		76.7552	188.412	172.927		113.647							362.399	175.533		220.508
		106.861		81.0449	83.7201		78.4065	87.5561	93.8083		138.143							759.685	105.93		174.469
		115.198		157	146.35		115.626	152.564	110.736		143.409							462.588	100.803		312.931
				153.029	140.832		84.6075		107.191		238.507							232.785
				134.64			98.5348		147.636		82.1187
				102.573			191.487		125.769		82.3463		Fig 4F	Time to peak response (ms)
				195.188			134.93		115.799		121.322				Cheriff	CoChR	ChR2	Chronos	ChrimsonR
				149.198					91.07		110.961			Mean	4.9925	5.3301	4.24714	3.88111	5.13194
									78.0404		117.576			St Dev	0.950648	0.527651	0.475294	0.893099	0.709432
									91.6703		101.392			n	3	8	7	3	7
									106.656		68.9305				4.425	6.025	4.655	4.51667	4.44286
									68.9131		67.8797				4.4625	5.4225	4.88333	2.86	5.63571
											74.8658				6.09	4.255	4.13333	4.26667	5.8
											94.6998					5.01333	3.65		5.47
											75.3393					5.45	4.55		5.51667
																5.24	3.68333		5.18333
Fig 4C	Resting Membrane Potential Values (MΩ)															5.535	4.175		3.875
		Control	Cheriff	CoChR	Chr2	Chronos	ChrimsonR	GtACR2	GtACR1	eArch3.0	eNpHR3.0					5.7
	Mean	-78.3749	-76.6306	-76.65	-72.2679	-79.5159	-76.2624	-77.9837	-76.2145	-71.0667	-73.6105
	St Dev	1.87722	1.32603	3.78262	4.59558	1.51146	3.94223	2.32351	3.03756	6.4291	3.80904		Fig 4G	Deactivation time constant (ms)
	n	7	3	12	8	3	11	8	16	3	19				Cheriff	CoChR	ChR2	Chronos	ChrimsonR
		-80.0904	-77.7248	-78.9367	-81.3429	-79.916	-70.8554	-76.345	-76.5829	-68.4	-76.4			Mean	12.5371	20.4369	15.161	4.25727	17.2785
		-75.0859	-75.1559	-78.5812	-71.4	-77.8447	-75.4455	-82.4217	-75.1126	-78.4	-76.4			St Dev	3.19017	4.50535	1.62754	0.425421	0.903682
		-80.1721	-77.0111	-82.0076	-71.4	-80.7871	-77.4604	-76.9886	-78.6777	-66.4	-74.4			n	3	8	7	3	7
		-79.3992		-81.0488	-70.4		-79.6761	-78.4916	-65.7969		-76.4				15.0081	20.2676	13.5934	3.83582	17.1771
		-78.8092		-78.3536	-66.4		-78.3504	-76.4663	-76.4405		-70.4				8.93561	20.4329	14.4995	4.68655	17.9329
		-78.3999		-74.8461	-69.4		-78.1401	-76.4403	-76.2591		-72.4				13.6676	25.3075	18.3325	4.24943	16.3328
		-76.6675		-68.3978	-76.4		-79.6252	-80.5026	-78.1048		-70.4					28.503	14.7962		16.5809
				-74.0284	-71.4		-82.1337	-76.2139	-77.523		-63.4					19.2874	13.7012		18.0295
				-77.4			-71.4		-78.7461		-74.4					15.0294	15.223		18.5571
				-73.4			-70.4		-74.6626		-75.4					18.6477	15.981		16.3396
				-74.4			-75.4		-75.4187		-74.4					16.0199
				-78.4					-76.5782		-72.4
									-78.1777		-74.4
									-76.7546		-74.4
									-78.0201		-69.4
									-76.5762		-81.4
											-70.4
											-77.4
											-74.4

## Sheet: Fig 4 Suplemental A-D
Fig 4 Sup A	Irradiance steps in mw/mm2											Fig 4 Sup C	Access resistance values (MΩ)
	Control	Cheriff	CoChR	Chr2	Chronos	ChrimsonR	GtACR2	GtACR1	eArch3.0	eNpHR3.0				Control	Cheriff	CoChR	Chr2	Chronos	ChrimsonR	GtACR2	GtACR1	eArch3.0	eNpHR3.0
	30.2326	2.79	1.05	1.05	2.79	1.1	2.8	0.9	6	3.4			Mean	60.5563	63.5569	47.3066	38.9745	58.5457	48.7066	67.7552	42.3476	46.5998	44.9682
		5.35	2.02	2.02	5.35	2.05	5.3	2	7.71	4.78			St Dev	10.1902	23.0985	12.4767	13.3754	4.54296	10.4242	15.6492	12.352	6.47212	10.6946
		10	2.79	2.79	10	5	10	5.2	10.67	6			n	7	3	12	8	3	11	7	16	3	19
		20.23	5.35	5	20.47	9.77	20.5	10.6	15.11	7.71				64.3366	39.6452	35.7623	70.4117	63.7914	48.1066	54.9715	45.03	48.7875	68.593
		30.47	10	9.48	30.47	19.77	30.47	19.8	20.56	10.67				52.6304	85.7456	30.9333	32.2981	55.8965	36.4401	77.8153	61.0296	39.3173	60.5058
			20.47	22.39		30.23		29.1	30.33	15.11				59.3216	65.2798	51.2181	33.4342	55.9493	38.0272	44.4418	31.0473	51.6946	45.4251
			30.47	32						20.56				76.5299		53.2332	37.3356		53.7687	89.3078	48.4651		47.1181
										30.33				63.642		37.0231	39.0645		49.237	66.433	60.4634		53.6097
														44.0688		55.3685	31.1412		44.7979	61.2214	42.8631		42.8841
Fig 4 Sup B	Cell numbers which met inclusion criteria													63.3651		55.6274	40.232		70.5613	80.0953	47.4734		46.7152
		Excluded	Included													50.4649	27.879		56.1587		38.0421		59.7128
	eNpHR3.0	6	19													49.0313			34.7557		41.8306		32.5224
	eArch3.0	4	3													34.5979			55.9359		61.6847		30.0065
	GtACR1	4	16													75.2372			47.984		47.0748		40.0331
	GtACR2	3	8													39.1819					32.521		53.6079
	ChrimsonR	8	11																		23.9538		51.1186
	Chronos	1	3																		27.3983		41.4979
	ChR2	8	8																		44.6119		35.377
	CoChR	2	8																		24.0733		36.8399
	Cheriff	3	3																				38.6379
	Control	4	7																				34.0555
																							36.1348
												Fig 4 Sup D	Membrane Capacitance values (pF)
														Control	Cheriff	CoChR	Chr2	Chronos	ChrimsonR	GtACR2	GtACR1	eArch3.0	eNpHR3.0
													Mean	7.37499	6.97359	9.23882	8.71889	6.85074	9.62705	6.135	9.31814	7.54555	9.68669
													St Dev	1.56777	1.02672	2.93639	2.42834	0.371968	2.28414	1.79365	2.61291	1.31244	3.34636
													n	7	3	12	8	3	11	7	16	3	19
														6.36448	8.03685	12.0552	6.52041	6.70453	10.0784	7.44514	10.8135	7.40537	6.89413
														8.15205	6.89611	15.0789	8.92053	7.2736	13.2102	4.24896	8.40574	8.92245	7.18422
														7.51293	5.98781	10.442	6.03292	6.5741	10.181	4.11237	14.1664	6.30883	6.14902
														5.75944		10.2763	5.63132		10.9854	6.80515	7.95269		6.89182
														6.28619		12.2604	11.6242		10.5841	5.51227	5.90008		6.79185
														10.4163		9.58495	10.8309		12.234	9.12045	9.37448		6.53843
														7.13353		6.74799	11.313		8.33968	5.70069	7.64316		8.58387
																6.11552	8.87783		9.43855		9.8016		4.87433
																7.15819			8.89095		5.86962		12.2822
																8.87679			5.53379		6.21605		13.8794
																5.31456			6.42139		7.54127		8.16059
																6.95507					9.32389		9.99483
																					12.6382		7.70813
																					10.2673		12.2126
																					9.10379		16.241
																					14.0724		13.0747
																							14.2828
																							10.6524
																							11.6507

## Sheet: Fig 4 Supplemental F-H
Fig 4 Sup F	Peak Photocurrent (pA)													Fig 4 Sup G	Time to peak photocurrent (ms)													Fig 4 Sup H	Deactivation time constant (ms)
	Control Cells
	LED Power mW/mm2	Mean	St Dev	n	Cell ID
					143	146	148	150	145	147	149
	30 (475 nm)	4.16426	2.11846	4	3.01086	2.00013	6.80964	4.83642
	30 (575nm)	2.87727	0.751519	4				3.08935	2.20411	3.84602	2.36959
	Cheriff Cells														Cheriff Cells														Cheriff Cells
	LED Power mW/mm2	Mean	St Dev	n	Cell ID										LED Power mW/mm2	Mean	St Dev	n	Cell ID										LED Power mW/mm2	Mean	St Dev	n	Cell ID
		across irradiance levels			59	60	63									across irradiance levels			59	60	63									across irradiance levels			59	60	63
	1.05														1.05			0											1.05			0
	2.02														2.02			0											2.02			0
	2.79	23.2743		1		23.2743									2.79	5.4		1		5.4									2.79	6.75763		1		6.75763
	5.35	24.495		1		24.495									5.35	1.75		1		1.75									5.35	6.72865		1		6.72865
	10	25.1053		1		25.1053									10	5.1		1		5.1									10	9.85738		1		9.85738
	20.23	52.8353	9.94944	2	59.8706		45.8								20.23	4.525	1.52028	2	3.45	5.6	﻿5,70497								20.23	14.8733	3.21342	3	13.7161	12.3988	18.5051
	30.47	34.3667	19.2918	3	55.5	17.7	29.9								30.47	5.745	0.487904	2	5.4		6.09								30.47	12.565	5.28209	2	16.3		8.83
	CoChR Cells														CoChR Cells														CoChR Cells
	LED Power mW/mm2	Mean	St Dev	n	Cell ID										LED Power mW/mm2	Mean	St Dev	n	Cell ID										LED Power mW/mm2	Mean	St Dev	n	Cell ID
		across irradiance levels			16	17	20	30	32	33	67	68				across irradiance levels			16	17	20	30	32	33	67	68				across irradiance levels			16	17	20	30	32	33	67	68
	1.05	183.995	197.519	2							323.662	44.3279			1.05	6	0.494975	2							5.65	6.35			1.05	17.8009	2.40077	2							19.4985	16.1033
	2.02	200.13	209.374	2							348.18	52.0805			2.02	5.475	0.388909	2							5.75	5.2			2.02	18.0877	2.08798	2							19.5641	16.6113
	3	576.816		1						576.816					3	5.55	0.540833	3						6.15	5.4	5.1			3	16.8871	1.77177	3						15.3754	18.8368	16.4491
	5	591.024	182.161	5	504.858	780.6				764.194	555.523	349.947			5	5.746	0.467793	5	6.45	5.48				5.75	5.2	5.85			5	17.9599	2.88213	5	20.831	20.76				14.7058	18.099	15.4037
	10.47	501.787	198.738	7	629.98	709.2		285.198	303.915	741.001	525.006	318.208			10.47	5.58714	0.301093	7	5.65	5.36		5.95	5.75	5.9	5.2	5.3			10.47	19.6112	4.43362	7	20.4713	20.453		28.0148	20.6385	14.9398	17.4108	15.3504
	19.77	495.157	158.082	8	576.269	655.777	405.9	383.3	354.574	758.091	513.409	313.936			19.77	5.605	0.339664	8	5.95	5.45	5.07	5.97	5.85	5.75	5.6	5.2			19.77	19.9178	4.41362	8	19.9656	20.0843	25.47	26.9942	19.4029	14.5962	17.4856	15.3431
	30.23	507.018	223.235	8	555.517	624.039	443.1	218.5	428.709	958.322	509.747	318.208			30.23	4.57625	1.31904	8	6.05	5.4	3.44	3.12	4.75	2.65	5.4	5.8			30.23	20.153	5.31388	8	19.8024	20.4344	25.145	30.5	17.8207	15.53	17.428	14.5636
	ChR2 Cells														ChR2 Cells														ChR2 Cells
	LED Power mW/mm2	Mean	St Dev	n	Cell ID										LED Power mW/mm2	Mean	St Dev	n	Cell ID										LED Power mW/mm2	Mean	St Dev	n	Cell ID
		across irradiance levels			66	81	83	84	86	87	89					across irradiance levels			66	81	83	84	86	87	89					across irradiance levels			66	81	83	84	86	87	89
	1.05	91.1531		1	91.1531										1.05	6.3		1	6.3										1.05	11.9946		1	11.9946
	2.02	94.0167		1	94.0167										2.02	5.45		1	5.45										2.02	12.9339		1	12.9339
	3	88.5236		1	88.5236										3	5.7		1	5.7										3	13.0549		1	13.0549
	5	242.892		1	242.892										5	2.75		1	2.75										5	14.2731		1	14.2731
	10.47	111.852	65.7363	7	200.168	84.9635	84.5728	145.788	167.049	99.5217	0.9				10.47	4.56667	0.889194	6	2.95	5.6	4.9	4.95	4.45	4.55					10.47	15.0894	1.34919	6	14.8183	15.0142	17.6783	13.7637	14.8974	14.3644
	19.77	138.055	45.5629	7	181.857	87.9543	76.6993	171.24	184.017	110.142	154.478				19.77	3.98571	0.85961	7	3.2	4.45	3.85	3.05	4.65	3.35	5.35				19.77	15.1584	2.39765	7	14.7627	12.8106	19.7626	14.9463	12.505	15.7926	15.5289
	30.23	122.379	52.2831	6	172.702	84.5973	45.2052	176.611		108.128	147.032				30.23	3.45	0.61887	6	3.35	4.6	3.65	2.95		3.15	3				30.23	15.9995	0.870877	6	15.1432	15.6737	17.5565	15.6787		15.512	16.4331
	Chronos Cells														Chronos Cells														Chronos Cells
	LED Power mW/mm2	Mean	St Dev	n	Cell ID										LED Power mW/mm2	Mean	St Dev	n	Cell ID										LED Power mW/mm2	Mean	St Dev	n	Cell ID
		across irradiance levels			48	54	55									across irradiance levels			48	54	55									across irradiance levels			48	54	55
	1.05														1.05														1.05
	2.02														2.02														2.02
	2.79	43.1017		1		43.1017									2.79	5.15		1		5.15									2.79	6.70975		1		6.70975
	5.35	41.1372	3.26397	2	43.4452	38.8292									5.35	4	1.55563	2	5.1	2.9									5.35	3.84431	0.0955534	2	3.91188	3.77675
	10	34.7886	7.02242	3	41.6141	35.1671	27.5846								10	3.65	1.35	3	3.65	2.3	5								10	4.25542	0.393916	3	3.99085	4.70813	4.06727
	20.23	35.8059	7.01481	3	42.8348	35.7775	28.8053								20.23	4.18333	1.52179	3	4.8	2.45	5.3								20.23	4.33383	0.641037	3	3.60472	4.58782	4.80896
	30.47	70.8423	6.04433	2		66.5683	75.1163								30.47	2	0.707107	2		1.5	2.5								30.47	3.7612	0.156794	2		3.65033	3.87207
	ChrimsonR Cells														ChrimsonR Cells														ChrimsonR Cells
	LED Power mW/mm2	Mean	St Dev	n	Cell ID										LED Power mW/mm2	Mean	St Dev	n	Cell ID										LED Power mW/mm2	Mean	St Dev	n	Cell ID
		across irradiance levels			23	25	26	28	101	104	105					across irradiance levels			23	25	26	28	101	104	105					across irradiance levels			23	25	26	28	101	104	105
	1.05	234.275	43.509	2	265.04	203.509									1.05	5.575	0.388909	2	5.3	5.85									1.05	16.1417	0.835007	2	15.5513	16.7322
	2.02	220.869	41.864	4	262.599	216.937	164.643	239.297							2.02	5.4875	0.317214	4	5.4	5.6	5.85	5.1							2.02	16.1426	0.697049	4	15.3313	16.9253	15.8515	16.4622
	3														3														3
	5	268.318	91.4635	7	418.939	333.633	165.864	247.231	223.234	177.033	312.29				5	5.16429	0.925434	7	3.5	6.15	6.1	5.5	5.05	5.3	4.55				5	17.3697	1.22041	7	18.5167	18.2313	16.0988	16.5575	18.4246	18.1063	15.6527
	10.47	280.736	104.672	4	410.394	310.44	165.864	236.245							10.47	5.425	1.19059	4	3.75	6.3	6.25	5.4							10.47	17.5623	1.35775	4	18.3771	19.0461	16.5195	16.3064
	19.77	265.379	83.3345	7	414.667	294.571	171.967	238.686	235.441	188.751	313.572				19.77	4.8	1.07432	7	3.7	4.3	5.45	5.95	5.8	5.2	3.2				19.77	17.6907	1.00185	7	18.549	19.2015	16.6218	16.6489	17.5384	18.2484	17.0266
	30.23	248.05	102.052	6	426.874	301.895	165.864	233.193	202.849	157.623					30.23	5.125	0.681726	6	3.8	5.45	5.35	5.4	5.7	5.05					30.23	17.9186	1.00562	6	18.3046	18.2636	16.5722	16.9295	18.1254	19.3166
