# Supplementary material for: A calibrated optogenetic toolbox of stable zebrafish opsin lines
Source: eLife. 2020 Mar 27;9:e54937. doi: 10.7554/eLife.54937 (PMC7170653; doi:10.7554/eLife.54937)
Supplement: Figure 5—source data 1. — Data provided as a XLSX file. [file elife-54937-fig5-data1.xlsx]

## Sheet: Fig 5 B-G
Fig 5B	Number of spikes per light stimulation																Fig 5E	Mean time to 1st spike across all spikes in a train														Fig 5G	Spike jitter across all spikes
				CoChR			ChrimsonR											Hz	CoChR								ChrimsonR						Hz	CoChR								ChrimsonR
		0.1ms	0.5ms	1ms	2ms	5ms	1ms	2ms	5ms										Cell ID								Cell ID							Cell ID								Cell ID
	Mean	0	0.875	1.38889	2.06667	3.13455	0.166667	1.2475	1.5										16	17	20	30	32	33	67	68	3	23	25	105				16	17	20	30	32	33	67	68	3	23	25	105
	St Dev	0	1.03078	1.17046	1.31103	1.73096	0.288675	0.571394	0.3									1	2.70583	3.915		1.745	3.1875	2.705	2.905	5.25	3.74	2.695	3.69	5.95			1	0.276722	2.11877		0.148212	1.30735	0.400922	0.316807	0.818861	0.0382971	0.111206	0.0840635	0.136931
	n	4	4	12	12	11	3	4	3									10	3.45133	2.71	2.13067	2.244	2.3	3.05967	3.3225			2.70667	3.988	5.99			10	0.55582	0.947523	0.311721	0.305767	0.615792	0.431555	0.468851			0.127958	0.443541	0.270185
				4	3.4	5.4		2										20	3.74333		1.9	3.01656		3.374				2.66889	3.51	5.8			20	0.996437		0.243311	0.83001		0.889547				0.228386	0.224153	0.206155
				1	2.2	3.2	0.5	1.33	1.8									50	4.8675			2.13		3.1				2.60222	3.156	5.44			50	1.49857			0.735391		1.68559				0.313695	0.327536	0.708343
				2.8	3.2		0	0.66	1.2
				1.4	1.6	1.4	0	1	1.5
				1.5	2.5	2
				0.8	2	4.4
				0.166667	1.4	2.83
				0	0	1.5
		0	2	2	4	5
		0	0	0.5	0.5	1
		0	0	0.5	0.5	2
		0	1.5	2	3.5	5.75
		Fig 5D	Number of spikes per each stimulation in a train across all frequencies tested														Fig 5F	Time to first spike per each stimulation in a train across all frequencies tested
			CoChR										ChrimsonR					CoChR										ChrimsonR
			Pulse #		Cell ID								Cell ID					Pulse #		Cell ID								Cell ID
					16	17	20	30	32	33	67	68	3	23	25	105				16	17	20	30	32	33	67	68	3	23	25	105
			1Hz	1	6	4		4	2	4.5	5	3	2	3	2	1		1Hz	1	2.29	2		1.56	2.52	2.18	2.5	4.24	3.7	2.56	3.58	5.75
				2	5	2		3	1	3.5	4	2	2	3	2	1			2	2.6	2.52		1.7	4.04	2.66	2.82	5	3.7	2.66	3.72	6.1
				3	4.5	1		2	0.5	3.5	3	1	2	3	2	1			3	2.81	4.48		1.82	4.9	2.89	3.08	5.62	3.78	2.74	3.68	5.95
				4	4	1		2	0.5	3.5	3	1	2	2	2	1			4	2.91	6.66		1.9	6.36	3.09	3.22	6.14	3.74	2.82	3.78	6.05
			10 Hz	1	5.5	3.5	4	4	4	2.5	2	0		2	1	1		10 Hz	1	2.39	2.04	1.51	1.62	1.78	2.54	2.8			2.72	5.16	6.45
				2	4.5	2	2	2.5	2	2	1	0		2	1	1			2	2.6	3.38	1.85	1.86	2.14	2.82	2.86			2.58	4.14	5.95
				3	3.5	0	1	1.5	1	2	1	0		2	1	1			3	3.05		2.14	2.06	2.98	3.3	3			2.54	3.88	5.95
				4	3.5	0	1	1	0	1.5	1	0		2	1	1			4	3.28		2.26	2.24		2.36	3.28			2.54	3.62	5.75
				5	3	0	1	1	0	1	1	0		2	1	1			5	3.56		2.27	2.32		2.54	3.32			2.64	3.6	5.85
				6	3	0	1	1	0	1	1	0		2	1				6	3.64		2.34	2.38		2.52	3.3			2.72	3.8
				7	3	0	0.5	1	0	1	1	0		1	1				7	3.75		2.54	2.44		2.52	4.02			2.8	3.8
				8	3	0	0.5	1	0	1	1	0		1	1				8	3.84		2.58	2.48		2.58	4			2.8	3.92
				9	3	0	0.5	1	0	1	0	0		1	1				9	3.86		2.6	2.52		2.56				2.86	3.96
				10	2.5	0	0.5	1	0	1	0	0		1	1				10	3.96		2.62	2.52		2.52				2.88	4
			20 Hz	1	5.5		2	3			6			2	1	1		20 Hz	1	2.4		1.78	1.56		1.78				2.42	3.48	6.15
				2	3.5		1	2			4			2	1	1			2	2.89		1.74	1.98		2.1				2.36	3.24	5.75
				3	2.5		1	1			3			2	1	1			3	3.76		2.18	2.5		2.72				2.4	3.34	5.65
				4	1.5		0	1			2			2	1	1			4	4.3			2.89		3.24				2.5	3.26	5.8
				5	1		0	1			2			2	1	1			5	4.46			3.27		4.04				2.56	3.4	5.65
				6	1		0	1			2			1	1				6	4.84			3.35		3.58				2.7	3.52
				7	1		0	1			1			1	1				7	4.96			3.63		4.08				2.74	3.48
				8	1		0	1			1			1	1				8	5.4			3.58		3.86				2.86	3.7
				9	1		0	0			1			1	1				9	5.32			4.12		4.28				2.9	3.74
				10	0.5		0	1			2			1	1				10	5.5			3.68		4.06				3	3.94
			50 Hz	1	5			3.5		4				2	1	1		50 Hz	1	3.1			1.61		1.8				2.44	3.72	6.7
				2	3			1		3				2	1	2			2	2.72			2.65		1.9				2.16	2.96	5.15
				3	3			0		1				2	1	2			3	3.14					2.6				2.24	2.9	5.15
				4	2			0		1				2	1	2			4	4.14					3.28				2.44	3.08	5.2
				5	2			0		1				2	1	2			5	4.62					5.92				2.52	3.12	5
				6	1			0		0				1					6	5.5									2.68
				7	1			0		0				1					7	5.7									2.44
				8	1			0		0				1					8	6.26									2.82
				9	1			0		0				1					9	6.86									3.02
				10	0			0		0				1					10										3.1
			100 Hz	1										2	1			100 Hz	1
				2										2	1				2
				3										2	1				3
				4										1	1				4
				5										0	1				5
				6										0	1				6
				7										0	1				7
				8										0	1				8
				9										0	1				9
				10										0	1				10

## Sheet: Fig 5 Supplement A-D
Fig 5 Sup A	Cell response type to opsin stimulation (percentage of responses)											Fig 5 Sup D	Number of spikes per each opsin stimulation
		Spike	Subthreshold event										Time of stim and irradiance mw/mm2	CoChR cell ID								ChRimsonR
	Chrimson 5ms	38	63											16	17	20	30	32	33	67	68	3	23	25	105
	Chrimson 2ms	36	64										1ms
	Chrimson 1ms	11	89										1.05							0			0	0
	Chronos 5ms	0	100										2.02							0			0	0
	Chronos 2ms	0	100										3		1	4	1		0
	Chronos 1ms	0	100										5		1	3	1		0	1	0		0	0
	ChR2 5ms	0	100										10.47		1	3	1		0	0	0		1	0	0
	ChR2 2ms	0	100										19.77	4	1	2	1	1	0	0	0		1	0	0
	ChR2 1ms	0	100										30.23	4	1	2	3	2	4	0	0		1	0
	CoChR 5ms	100	0										2ms
	CoChR 2ms	88	13										1.05							1			0	0
	CoChR 1ms	88	13										2.02							0		2	0	0
	Cheriff 5ms	0	100										3	3	2	4	2		2
	Cheriff 2ms	0	100										5	3	2	3	1		1	2	0	2	2	1
	Cheriff 5ms	0	100										10.47	3	2	3	1		1	2	0		2	1	1
	Control 5ms	0	100										19.77	3	2	3	1	3	1	2	0		2	1	1
													30.23	5	3	3	3	2	5	2	0		2	1
Fig 5 Sup B	Membrane voltage depolarisation level per opsin stimulation - average across all irradiance level stimuli (mV)												5ms
		Control (475 nm)	Cheriff	CoChr	ChR2	Chronos	ChrimsonR	Control (575nm)	CoChR Spike	ChRimsonR Spike			1.05							1	0		0	0
	Mean	-75.078	-74.5465	-64.4552	-61.4081	-74.0565	-65.5877	-75.6425	32.8093	17.2099			2.02							0	0		0	0
	St Dev	4.29324	1.26561	4.4064	5.09073	0.168557	5.39669	1.3864	14.327	29.7816			3	6	4		2		5
	n	5	3	3	8	3	10	4	8	4			5	5	3		1		4	4	3		3	2
		-78.46	-73.0924	-59.3671	-69.2573	-74.249	-74.0689	-76.1	42.6532	9.83914			10.47	6	3		1		4	4	2		3	2	1
		-67.98	-75.147	-67.0072	-61.4628	-73.985	-62.4316	-77.39	49.1712	45.0076			19.77	5	3		1	3	4	4	2		3	2	2
		-77.09	-75.4	-66.9912	-54.1057	-73.9354	-62.988	-74.35	24.0634	35.5022			30.23	5	3		2	1	5	4	2
		-77.72			-54.1362		-63.3878	-74.73	36.1199	-21.5093
		-74.14			-62.9517		-73.3474		7.78429
					-62.3533		-67.7625		47.194
					-64.385		-69.0725		20.663
					-62.613		-65.1575		34.8254
							-58.6996
							-58.9612
Fig 5 Sup C	Time to peak voltage depolarisation level per opsin stimulation - average across all irradiance level stimuli (ms)
		Cheriff	CoChr	ChR2	Chronos	ChrimsonR	CoChR Spike	ChRimsonR Spike
	Mean	6.83111	4.18878	6.3934	3.895	5.30086	2.65132	3.29304
	St Dev	3.54284	0.896303	0.970313	1.32194	0.70637	1.02704	0.451523
	n	3	3	8	3	8	8	4
		5.13333	3.3125	4.675	5.275	5.9	2.52917	3.075
		4.45667	4.15	5.9	2.64	4.45	2.12667	2.765
		10.9033	5.10385	7.55556	3.77	4.605	1.42	3.60714
				6.93889		4.91923	2.74	3.725
				5.57778		6.51765	1.60833
				6.72778		4.895	2.53636
				6.39444		5.5725	3.875
				7.37778		5.5475	4.375
