# Supplementary material for: A calibrated optogenetic toolbox of stable zebrafish opsin lines
Source: eLife. 2020 Mar 27;9:e54937. doi: 10.7554/eLife.54937 (PMC7170653; doi:10.7554/eLife.54937)
Supplement: Figure 6—source data 1. — Data provided as a XLSX file. [file elife-54937-fig6-data1.xlsx]

## Sheet: Figure 6F
470 nm 10 s pulse (bout rate 'late LED On' - normalised)	GtACR2
0	1.08223	1.62334	1.35279	0.541114	0.541114	0.811671	0.811671	2.70557	1.35279	2.16446	1.35279	0.811671	1.62334	0.811671	1.08223	1.35279	1.08223	1.35279	1.35279	1.08223	0.811671	1.08223	2.16446	1.08223	1.62334	1.08223	1.08223	2.16446	0.811671	1.08223	1.35279	0.541114	0.270557	1.62334	2.43501	1.08223	0.541114	0.541114	0.541114	0.541114	0.270557	1.35279	1.8939	0.811671	0.270557	0.270557	0	0.541114	0.541114
0.07	1.35279	0.541114	0.811671	0.270557	1.08223	0.811671	0.541114	1.62334	0.541114	0.541114	0.811671	0.811671	1.35279	0.811671	1.8939	0.541114	1.62334	0.811671	1.8939	1.8939	0.541114	1.35279	0.811671	0.541114	1.35279	0.811671	1.08223	1.35279	0	0	0.811671	0.270557	1.35279	0.270557	0.811671	1.62334	0.541114	0	0.270557	0.811671	0.270557	2.43501	2.16446	0.541114	0.541114	1.08223	0.811671	0.541114	0.541114
1.68	0	0.541114	0	0	0.270557	0.541114	0	0.270557	0	0.811671	1.08223	0.270557	0.541114	0.270557	0.811671	0	0	0	0.270557	0.811671	0	0.541114	0	0	0.541114	0.541114	0	1.08223	0.541114	0.270557	0	0	0	0	0	0	0	0	1.08223	0	0	0	0.270557	0	0	0.541114	0	0	0.270557
8.45	0	0	0	0	0	0	0.270557	0.541114	0	0	0	0.270557	0	0	0	0	0	0.811671	0.270557	1.8939	0	0	0	1.08223	0.270557	0	0	0	0	0.270557	0	0	0	0	0	0	0	0	0	0	0.811671	0	0	0	0	0	0	0	0
42.7	0	0	0	0	0	0	0	0	0	0	0	0	0	0	0	0	0	0.270557	0	0	0	0	0	0	0	0	0	0	0	0.541114	0	0	0	0	0	0.541114	0	0	0	0	0	0	0	0	0	0	0	0	0
225	0	0	0	0	0	0	0	0	0	1.8939	0	0	0	0	0	0	0	2.97613	0	0	0	0	0	0	0	0	0	0	0	0	0	0	0	0	0	0	0	0	0	0	0	0	0	0	0	0	0	0	0
Irradiance μW/mm2
[truncated: 408 more columns]

## Sheet: Figure 6G
590 nm 10 s pulse (bout rate 'late LED On' - normalised)	GtACR2
0	1.31613	0.43871	0.658065	1.09677	0.658065	1.31613	0.219355	1.97419	0.43871	1.97419	0.877419	1.31613	0.877419	0.43871	1.75484	1.75484	1.53548	1.09677	1.75484	0.877419	0.658065	0.658065	1.53548	0.658065	1.53548	1.09677	1.09677	0.877419	0.43871	1.09677	0.658065	0.43871	1.31613	0.219355	1.53548	1.53548	0.877419	0.658065	1.09677	0.43871	1.31613	0.877419	1.53548	0.43871	0.658065	1.09677	0.877419	0.877419	0.658065
0.06	0.658065	0.877419	0.658065	0.658065	0.877419	0.877419	0.658065	0.658065	1.31613	1.97419	0.43871	1.09677	0.658065	0.658065	1.31613	0.658065	1.09677	2.19355	0.877419	1.31613	1.09677	1.53548	0.877419	1.09677	1.09677	0.877419	1.09677	0.658065	0.43871	0	0.219355	0.219355	0.43871	1.09677	0.877419	1.31613	0.877419	0.877419	0.658065	0.43871	0.43871	0.877419	1.09677	0.658065	0.877419	1.09677	0.658065	0.43871	0.43871
2.2	0.658065	0.43871	0.658065	1.31613	0.43871	0.658065	0.658065	0.877419	0.658065	0.877419	1.09677	0.877419	0.877419	0.658065	0.658065	0.43871	0.658065	0.658065	0.43871	0.877419	0.658065	0.658065	1.09677	0.877419	0.43871	0.658065	0.43871	0.658065	0.219355	0.219355	0.43871	0.219355	0	0	0.877419	0.658065	0.877419	0.219355	0.877419	1.31613	0.43871	0.877419	1.09677	0.43871	0.658065	0.877419	0.219355	0.43871	0.877419
15.9	0.877419	0.219355	0	0.219355	0.877419	0.219355	0.43871	0.658065	0.658065	0.43871	0.43871	1.09677	0.877419	0.219355	0	0.219355	1.75484	0.219355	0.43871	1.09677	0.219355	0.658065	1.31613	0.658065	0.877419	0.658065	0.658065	0.43871	0	0.43871	0.43871	0	0.219355	0.877419	0.43871	1.09677	0.877419	0.877419	0.43871	0	0.43871	0.658065	0.658065	0.43871	0.658065	0.658065	0.219355	0.219355	0.658065
50.5	0	0.219355	0.219355	0.43871	0	0.219355	0	0	0.43871	0.658065	0.877419	0.658065	0.43871	0.658065	0.43871	0.219355	0.219355	0.43871	0.43871	0.43871	1.53548	1.09677	0.219355	0.658065	0.877419	0.877419	1.09677	0.43871	0.658065	0	0.658065	0	0	0	0.219355	0.43871	0	0.658065	0	0	0.219355	0.658065	0.43871	0.877419	0.43871	0.43871	0.877419	0.219355	0
227	0.877419	0.219355	0.658065	1.53548	0.219355	0.219355	1.31613	1.09677	3.50968	0.877419	1.97419	0.43871	0.43871	0.43871	1.31613	1.31613	1.31613	1.31613	1.53548	0.658065	0.658065	0.877419	5.48387	1.53548	0.658065	0.43871	0.219355	0.658065	1.75484	1.31613	0.43871	1.97419	0.877419	0	0	1.53548	0.43871	0	2.4129	0	0.658065	0.219355	0.877419	0.658065	0	0.219355	1.31613	0	0
Irradiance μW/mm2
[truncated: 408 more columns]
