# Supplementary material for: A calibrated optogenetic toolbox of stable zebrafish opsin lines
Source: eLife. 2020 Mar 27;9:e54937. doi: 10.7554/eLife.54937 (PMC7170653; doi:10.7554/eLife.54937)
Supplement: Figure 7—source data 1. — Data provided as a XLSX file. [file elife-54937-fig7-data1.xlsx]

## Sheet: Figure 7E
459 nm 10 s pulse (bout rate 'LED On' - normalised)	GtACR2																GtACR1																								eArch3.0
0	1.45283	0.716981	1.32075	0.90566	0.943396	0.943396	0.415094	0.735849	1.33962	1.20755	0.924528	0.509434	1.51132	0.764151	0.645283	1.66415	0.656604	1.42642	1.05283	1.15472	0.928302	0.984906	1.04151	1.38113	0.124528	1.1434	1.30189	1.23396	1.21132	1.1434	1.16604	1.29057	0.792453	0.532075	0.860377	1.01887	1.12075	1.10943	0.645283	0.679245	1.1438	1.33691	1.50031	1.33691	0.121537	1.11814	1.38553	1.27614	0.735302
0.24	0.622642	0.45283	0.735849	0.849057	0.339623	0.679245	0.396226	0.45283	0.90566	0.339623	0.679245	0.679245	0.509434	0.622642	0.339623	0.509434	0.679245	1.32453	0.30566	0.849057	1.01887	1.18868	0.849057	0.849057	0.339623	0.883019	0.577358	1.18868	1.01887	0.237736	1.18868	1.01887	0.611321	0.611321	0.883019	0.815094	0.916981	0.713208	0.883019	0.30566	0.846711	1.15866	1.78255	1.06953	0.401074	1.13638	1.23664	1.20322	0.467919
1.31	0.962264	0.622642	0.962264	0.792453	0.509434	0.679245	0.339623	0.90566	0.622642	0.849057	0.622642	0.45283	0.679245	0.849057	0.735849	1.13208	0.713208	0.849057	0.237736	0.645283	1.05283	1.12075	0.373585	0.30566	0.0679245	0.781132	0.407547	0.883019	0.74717	0.373585	1.18868	1.12075	0.407547	0.713208	0.950943	0.611321	1.18868	0.781132	0.849057	0.339623	0.71302	1.06953	1.33691	1.29235	0.222819	0.71302	1.73799	0.802147	0.23396
2.55	1.05849	0.792453	1.09811	1.00868	0.339623	0.679245	0.45283	0.792453	0.566038	0.90566	1.07547	0.509434	0.90566	1.24528	0.792453	1.13208	0.645283	1.12075	0.373585	0.679245	0.883019	1.46038	0.30566	0.679245	0.0679245	1.01887	0.781132	0.849057	0.713208	0.169811	1.05283	1.08679	0.373585	0.74717	0.849057	0.645283	0.916981	0.441509	0.916981	0.339623	0.980402	0.980402	1.24778	1.4706	0.445637	1.06953	1.42604	1.06953	0.267382
Irradiance mW/mm2
[truncated: 75 more columns]

## Sheet: Figure 7F
617 nm 10 s pulse (bout rate 'LED On' - normalised)	GtACR2																GtACR1																								eArch3.0
0	1.50696	0.376739	1.33428	0.737781	1.75812	1.31859	0.831966	1.02034	1.05958	0.155405	0.339065	0.141277	1.66964	0.95041	1.18159	1.61827	0.861556	1.37169	1.08828	1.14496	0.668839	1.02026	1.04294	1.19031	0.612158	1.1563	1.66643	1.42837	0.997591	0.861556	1.24699	1.07694	0.997591	0.793538	1.09962	1.0316	0.908035	0.897832	0.418308	0.418308	1.00973	1.25851	1.30241	0.863394	0.763884	1.46192	1.27753	1.40923	1.18534
0.24	0.98894	0.235462	1.60114	0.612201	1.36568	0.706386	0.706386	1.27149	0.659294	0.141277	0	0.18837	1.58937	0.671067	0.98894	1.55405	1.12229	1.08828	0.782202	0.918237	0.612158	1.05427	0.476123	0.986255	0.748193	1.25833	1.39436	1.76846	0.782202	0.782202	1.12229	1.02026	0.680176	0.918237	1.25833	0.816211	0.918237	1.29233	0.136035	0.408105	0.921929	1.27314	1.22924	1.18534	1.15241	0.987781	1.31704	1.5146	1.18534
0.63	1.41277	0.0941848	1.69533	0.518016	1.36568	0.894756	0.98894	0.98894	0.847663	0	0.612201	0	1.44809	1.20086	1.20086	1.62469	0.952246	1.25833	0.85022	1.08828	0.646167	0.85022	1.05427	0.816211	0.646167	1.1563	1.46238	1.70044	0.680176	0.510132	1.02026	1.02026	0.612158	0.884228	1.19031	0.816211	0.782202	0.918237	0.204053	0.27207	0.878027	0.702422	1.14144	1.22924	0.746323	0.921929	1.27314	1.36094	0.658521
1	1.17731	0.141277	1.55405	0.800571	1.45986	0.941848	0.847663	1.08313	0.894756	0.329647	0.141277	0.141277	1.60114	1.31859	1.13022	1.74242	0.884228	1.02026	0.578149	0.986255	0.646167	0.884228	0.306079	1.08828	0.680176	1.05427	1.12229	1.42837	0.918237	0.680176	1.05427	0.986255	0.578149	0.952246	1.22432	0.646167	0.85022	1.05427	0.374097	0.510132	1.09753	1.09753	1.36094	0.96583	1.18534	0.96583	1.49265	1.31704	1.22924
Irradiance mW/mm2
[truncated: 75 more columns]
