# Supplementary material for: A calibrated optogenetic toolbox of stable zebrafish opsin lines
Source: eLife. 2020 Mar 27;9:e54937. doi: 10.7554/eLife.54937 (PMC7170653; doi:10.7554/eLife.54937)
Supplement: Figure 8—source data 1. — Data provided as a XLSX file. [file elife-54937-fig8-data1.xlsx]

## Sheet: Fig 8 C-G
Fig 8C	Peak photocurrent (pA)
		Control	GtACR2_Embryonic	GtACR1_Larval	GtACR1_Embryonic	eArch3.0	eNpHR3.0
	Mean	-8.57506	-837.39	-250.776	-1177.97	156.135	92.193
	St Dev	8.624	586.976	112.234	882.163	43.744	75.4321
	n	7	5	8	7	3	13
		-6.96487	-406.114	-108.112	-393.664	116.421	45.8117
		-11.643	-1185.31	-322.465	-820.517	203.022	63.4848
		-15.8858	-353.576	-101.214	-1318.17	148.962	286.784
		-22.636	-539.512	-355.447	-3017.07		75.3739
		-3.07389	-1702.44	-377.966	-1303.9		135.672
		-1.06857		-337.012	-547.236		59.6036
		1.24675		-179.803	-845.232		31.2061
				-224.192			34.1177
							102.885
							68.5111
							31.556
							62.3628
							201.141
Fig 8D	Steady-state photocurrent (pA)
		Control	GtACR2_Embryonic	GtACR1_Larval	GtACR1_Embryonic	eArch3.0	eNpHR3.0
	Mean	#DIV/0!	-43.7315	-41.3342	-134.571	106.054	84.0289
	St Dev	#DIV/0!	23.57	12.0648	44.6092	24.5576	71.1772
	n	0	3	8	7	3	13
			-61.6843	-64.0383	-192.495	89.929	40.8598
			-52.4699	-32.2215	-111.249	134.317	58.6252
			-17.0402	-28.6733	-170.5	93.9159	268.704
				-41.6095	-156.64		67.1435
				-37.9993	-149.686		125.396
				-48.9385	-91.5142		50.5316
				-29.2136	-69.9145		26.4588
				-47.98			28.5226
							97.8604
							60.9708
							27.228
							56.3033
							183.771
Fig 8E	Activation photocurrent time constant (ms)
		Control	GtACR2_Embryonic	GtACR1_Larval	GtACR1_Embryonic	eArch3.0	eNpHR3.0
	Mean	#DIV/0!	1.4728	21.2733	21.9161	21.7732	18.9644
	St Dev	#DIV/0!	1.03387	17.1937	19.6967	5.01838	7.19653
	n	0	5	8	7	3	13
			1.42433	37.0502	8.14654	27.3932	16.0178
			1.34628	9.18585	4.18547	17.7401	22.4509
			1.02698	9.84925	7.05918	20.1863	9.53931
			0.392939	7.42998	38.7979		10.2203
			3.17348	6.46212	37.3942		14.7137
				12.5812	51.0566		24.6762
				48.3489	6.77294		22.9902
				39.2786			13.8987
							37.2349
							21.1357
							17.2226
							17.9759
							18.4609
Fig 8F	Inactivation photocurrent time constant (ms)
		Control	GtACR2_Embryonic	GtACR1_Larval	GtACR1_Embryonic	eArch3.0	eNpHR3.0
	Mean	#DIV/0!	144.171	192.865	237.116	770.372	#DIV/0!
	St Dev	#DIV/0!	49.572	109.802	100.613	178.498	#DIV/0!
	n	0	3	8	7	3	0
			186.848	292.812	389.649	669.249
			89.7965	117.692	271.141	665.395
			155.869	395.378	199.74	976.471
				93.6085	86.6317
				107.336	297.755
				149.937	265.902
				259.162	148.993
				126.997
Fig 8G	Deactivation photocurrent time constant (ms)
		Control	GtACR2_Embryonic	GtACR1_Larval	GtACR1_Embryonic	eArch3.0	eNpHR3.0
	Mean	#DIV/0!	51.0481	188.314	97.0216	30.3363	20.5263
	St Dev	#DIV/0!	10.8424	70.6287	39.344	5.1088	8.26269
	n	0	3	8	7	3	13
			55.0663	69.684	49.9285	32.4684	17.5773
			59.3077	192.881	112.197	34.0337	29.8289
			38.7702	110.524	75.0633	24.5067	13.8279
				216.144	70.7507		7.99126
				278.142	90.7402		19.3231
				195.95	171.001		20.8717
				264.353	109.471		32.2489
				178.831			32.0509
							23.0031
							22.3651
							11.3177
							9.69594
							26.7408

## Sheet: Fig 8 Supplement B-H
Fig 8 Sup B	GtACR1 peak photocurrent during different membrane holding potentials (nA)												Fig 8 Sup D	Peak Photocurrent (pA)																		Fig 8 Sup E	Steady State Photocurrent (pA)
	Embryonic ECl -50mV
	V_Hold Level (mv)	Mean	St Dev	n	cell ID									Control Cells
					45	44	152	153	155					LED Power mW/mm2	Mean	St Dev	n	Cell ID
	-98.5114	-2.48261	0.762774	5	-2.98949	-2.01879	-3.56552	-1.76366	-2.0756									143	145	146	148	150	147	149
	-86.1372	-1.81724	0.636802	5	-2.22992	-1.49788	-2.71575	-1.16227	-1.48039					30 (475 nm)	-14.6919	8.91412	5	-6.96487	-23.8	-15.8858	-22.636	-4.17299
	-73.8732	-1.32647	0.473739	5	-1.65044	-1.10785	-1.97614	-0.811358	-1.08658					30 (575nm)	-0.320658	1.46617	4		0.513988			-1.9748	-1.06857	1.24675
	-61.9974	-0.85067	0.320048	5	-1.08306	-0.781912	-1.26436	-0.480769	-0.643249
	-50.2056	-0.211876	0.293501	5	-0.57026	-0.49306	0.01825	0.004832	-0.019141					GtACR2 Embryonic																			GtACR2 Embryonic
	-35.6361	0.082383	0.216067	5	-0.08078	-0.210761	0.17837	0.257314	0.267772					LED Power mW/mm2	Mean	St Dev	n	Cell ID															LED Power mW/mm2	Mean	St Dev	n	Cell ID
	ECl	-41.0386	6.39974	5	-36.784	-32.098	-43.3263	-47.2232	-45.7616	mv *					across irradiance levels			11	6	7	8	10												across irradiance levels			11	6	7	8	10
														1.05			0																1.05			0
	Larval ECl -70mV													2.79	-505.978		1	-505.978															2.79	-70.8099		1	-70.8099
	V_Hold Level (mv)	Mean	St Dev	n	cell ID									5.35	-394.284		1	-394.284															5.35	-61.5326		1	-61.5326
					40	46	156							10	-671.515	375.664	2	-405.881				-937.149											10	-59.1949		1	-59.1949
	-101.472	-1.26445	0.958145	3	-2.30286	-1.07588	-0.414609							15			0																15			0
	-88.0356	-0.823471	0.58698	3	-1.45081	-0.732017	-0.287585							20.23	-706.758	410.917	3	-389.401			-559.959	-1170.91											20.23	-60.08		1	-60.08
	-75.1227	-0.449164	0.286551	3	-0.74585	-0.427687	-0.173956							30.47	-1078.45	1128.26	5	-335.027	-1185.31	-353.576	-519.065	-2999.25											30.47	-42.1048	21.8145	3	-56.8042	-52.4699	-17.0402
	-62.5672	-0.0494621	0.0497398	3	-0.0415039	-0.102701	-0.0041812
	-50.2802	0.349052	0.312944	3	0.690308	0.281342	0.075505							GtACR1 Embryonic																			GtACR1 Embryonic
	-35.705	0.733084	0.62824	3	1.42883	0.563083	0.207339							LED Power mW/mm2	Mean	St Dev	n	Cell ID															LED Power mW/mm2	Mean	St Dev	n	Cell ID
	ECl	-59.9056	1.62252	3	-61.7754	-59.0736	-58.8678	mv *							across irradiance levels			12	43	44	45	152	153	155										across irradiance levels			12	43	44	45	152	153	155
	* mV values interpolated at Y = 0 nA													1.05	-647.097	454.671	7	-341.888	-908.862	-881.806	-1340.18	-164.616	-107.273	-785.06									1.05	-128.145	46.0186	7	-172.973	-109.472	-186.926	-162.388	-113.981	-73.9907	-77.2837
														2.79	-937.014	790.401	7	-430.389	-886.889	-1193.08	-2535.86	-317.814	-241.551	-953.517									2.79	-140.389	38.374	7	-194.964	-110.266	-172.028	-160.508	-135.227	-127.146	-82.5816
														5.35			0																5.35			0
														10	-1263.27	932.089	7	-388.711	-716.657	-1381.41	-3100.46	-1747.68	-696.908	-811.087									10	-137.559	49.3534	7	-192.447	-118.964	-171.666	-166.413	-166.792	-82.0092	-64.6212
														15			0																15			0
														20.23	-1513.52	1246.17	7	-402.139	-793.561	-1543.77	-4033.08	-2107.78	-868.417	-845.877									20.23	-134.402	48.0013	7	-198.727	-110.926	-162.194	-148.865	-167.457	-88.8696	-63.7729
														30.47	-1528.95	1271.67	7	-405.191	-796.613	-1590.76	-4075.8	-2181.64	-822.03	-830.619									30.47	-132.362	49.8558	7	-203.366	-106.617	-159.685	-145.026	-164.973	-85.5554	-61.3131
														GtACR1 Larval																			GtACR1 Larval
														LED Power mW/mm2	Mean	St Dev	n	Cell ID															LED Power mW/mm2	Mean	St Dev	n	Cell ID
															across irradiance levels			13	35	36	40	46	47	156	157									across irradiance levels			13	35	36	40	46	47	156	157
														1.05	-155.078	106.418	8	-52.6347	-277.909	-91.448	-302.397	-193.614	-221.961	-46.0072	-54.6504								1.05	-33.4979	7.33708	8	-29.6976	-29.6122	-29.3569	-44.3217	-37.309	-40.4119	-21.4466	-35.8272
														2.79	-233.508	164.965	8	-70.9452	-367.021	-110.979	-423.246	-277.842	-452.064	-73.473	-92.4922								2.79	-42.7547	11.4038	8	-43.9127	-34.8307	-27.9898	-52.1098	-40.2875	-57.4651	-30.1075	-55.334
														5.35			0																5.35			0
														10	-281.766	105.205	5	-131.262			-300.076	-409.519		-234.21	-333.761								10	-47.8667	17.0387	5	-74.5542			-37.5329	-40.7382		-32.0986	-54.4094
														15			0																15			0
														20.23	-312.527	128.751	5	-139.807			-344.021	-494.968		-265.949	-317.892								20.23	-46.6252	21.0745	5	-82.6169			-37.1483	-34.7079		-30.8779	-47.7749
														30.47	-333.768	138.079	5	-145.91			-407.497	-513.889		-279.376	-322.165								30.47	-48.278	23.6219	5	-89.4101			-36.9347	-36.954		-31.5371	-46.5542
														eArch3.0																			eArch3.0
														LED Power mW/mm2	Mean	St Dev	n	Cell ID															LED Power mW/mm2	Mean	St Dev	n	Cell ID
															across irradiance levels			107	111	113														across irradiance levels			107	111	113
														1.05			0																1.05			0
														2.79	66.4701		1	66.4701															2.79	57.9649		1	57.9649
														5.35	92.1049		1	92.1049															5.35	77.1336		1	77.1336
														10	130.045	18.4879	3	124.27	150.731	115.133													10	100.036	17.4059	3	97.9447	118.394	83.7708
														15	162.332	31.2913	3	141.177	198.277	147.543													15	100.137	4.301	3	104.72	99.5044	96.1877
														20.23	179.015	34.5612	3	158.084	218.907	160.055													20.23	122.296	29.8335	3	111.882	155.941	99.0662
														30.47	208.646	50.2463	2		244.175	173.116													30.47	130.034	47.2278	2		163.429	96.6388
														eNpHR3.0																			eNpHR3.0
														LED Power mW/mm2	Mean	St Dev	n	Cell ID															LED Power mW/mm2	Mean	St Dev	n	Cell ID
															across irradiance levels			125	126	128	129	131	134	137	138	116	119	120	121	135				across irradiance levels			125	126	128	129	131	134	137	138	116	119	120	121	135
														1.05			0																1.05			0
														2.79	80.6979	59.142	9	34.9475	44.6402	198.246	55.9647	106.085	48.9224		24.0012	62.382				151.092			2.79	72.7112	55.9797	9	30.8368	40.82	188.682	48.6655	93.0549	40.5661		19.0396	58.7858				133.951
														5.35	88.6943	68.3553	10	41.2951	54.8331	232.548	67.2562	123.358	52.4014	26.4454	29.0671	84.2326				175.506			5.35	80.7809	65.4678	10	36.8634	50.2762	218.542	60.7486	115.586	38.273	21.3203	24.2691	79.9858				161.945
														10	101.276	88.1526	13	52.9529	75.6461	321.049	84.5292	154.608	68.2706	33.4644	40.9079	114.079	57.6468	24.7353	49.8354	238.861			10	93.0689	83.2891	13	47.6611	70.0339	302.486	76.6214	144.949	60.9689	28.4717	34.7519	108.871	50.4092	20.6063	45.7948	218.27
														15	106.445	90.8174	13	54.0515	78.8199	339.97	85.0785	158.636	68.8199	33.7086	42.4948	121.952	68.0228	31.2661	61.8593	239.105			15	97.6561	85.6153	13	48.078	73.3707	318.016	74.9558	147.994	62.3184	29.5844	36.03	115.159	59.6066	27.1792	56.3167	220.92
														20.23	122.582	112.075	6			342.106	84.0409					131.779	75.7742	33.9516	67.8407				20.23	112.617	104.336	6			315.796	74.7263					126.501	67.9501	29.8818	60.8492
														30.47	59.5958	20.2444	3										72.6004	36.271	69.9159				30.47	53.138	19.0485	3										65.9171	31.2447	62.2524
