# Supplementary material for: A calibrated optogenetic toolbox of stable zebrafish opsin lines
Source: eLife. 2020 Mar 27;9:e54937. doi: 10.7554/eLife.54937 (PMC7170653; doi:10.7554/eLife.54937)
Supplement: Figure 9—source data 1. — Data provided as a XLSX file. [file elife-54937-fig9-data1.xlsx]

## Sheet: Fig 9 B-H
Fig 9B	Peak membrane voltage deflection level per opsin stimulation - average across all irradiance level stimuli (mV)								Fig 9F	Percentage of spikes inhibited with a short 5ms opsin light activation							Fig 9H	Number of spikes per 50ms time bin remaining during long opsin light activation
											Control	GtACR2_Embryonic	GtACR1_Larval	GtACR1_Embryonic	eNpHR3.0			irradiance mW/mm2	GtACR1_Larval					GtACR1_Embryonic				eNpHR3.0
		Control	GtACR2_Embryonic	GtACR1_Larval	GtACR1_Embryonic	eArch3.0	eNpHR3.0			Mean	0	82.6923	93.1287	-8.36379	80.6264				45	152	153	155	12	36	46	47	156	115	116	117	126	128	129	131	134	135	137	138
	Mean	3.92905	21.6001	9.41496	21.741	-21.5542	-10.2265			St Dev	0	34.6154	10.735	83.2429	35.3151			0	1.5	16.5	6	4	5	14	0.5	2.5	5	4	6	3	4.25	4	12	7.25	10	6.75	6	7.25
	St Dev	2.38865	5.11967	2.71932	8.12663	8.64316	5.1842			n	6	4	6	7	9			3	0.5	2.5	0	0	1.5	1	0	0.5	0	0	0	0	0	0	9	0	7	0	4	6
	n	7	5	8	6	2	16				0	30.7692	100	-76.087	100			10	1	3.5	0	0	1.5		0	0	0		0	0	0	0	5	0	1	0	0	0.25
		5.37751	27.4096	3.38536	33.0643	-15.4425	-17.8275				0	100	77.193	-87.163	45.6376
		3.92458	17.2717	11.4435	30.8333	-27.6658	-4.64421				0	100	100	-26.3158	100
		7.33064	15.4324	11.4566			-11.5959				0	100	100	35.0877	100
		5.99694	22.652	9.70193	18.234		-5.27551				0		81.5789	-93.5421	100
		2.09408	25.2348	9.86253	14.5079		-9.43564				0		100	100	80
		1.50381		11.2875	14.9161		-10.9603							89.4737	100
		1.27578		10.3411	18.8904		-12.1605								100
				7.84121			-6.50455								0
							-19.6345
							-8.08769
							-10.789
							-18.857
							-9.65266
							-11.7757
							-3.1299
							-3.29266
Fig 9C	Steady state membrane voltage deflection level per opsin stimulation - average across all irradiance level stimuli (mV)
		GtACR2_Embryonic	GtACR1_Larval	GtACR1_Embryonic	eArch3.0	eNpHR3.0
	Mean	11.8448	5.29191	13.9973	-15.0528	-9.80881
	St Dev	3.54221	1.42006	4.55786	5.70138	5.0054
	n	3	8	7	2	16
		13.2433	3.09036	16.4463	-11.0213	-17.4628
			7.07442	19.2492	-19.0842	-4.40541
			5.54632	18.6724		-11.0611
		14.4743	6.80276	13.5445		-5.03519
		7.81685	4.06928	13.8148		-9.06561
			5.94695	8.27848		-10.6544
			5.77363	7.97526		-11.3243
			4.0316			-6.30161
						-18.8128
						-7.91603
						-10.5154
						-18.0552
						-9.1125
						-11.1846
						-2.92543
						-3.10854
Fig 9D	Voltage deflection deactivation time constant level per opsin stimulation - average across all irradiance level stimuli (ms)
		GtACR2_Embryonic	GtACR1_Larval	GtACR1_Embryonic	eArch3.0	eNpHR3.0
	Mean	66.4177	271.78	203.761	31.7922	25.4027
	St Dev	13.96	70.9686	54.7081	1.61127	7.78527
	n	6	8	7	2	16
		65.5303	163.743	247.163	32.9315	27.7985
		48.0187	206.932	220.407	30.6528	29.1629
		53.7064	306.452	287.207		24.8623
		80.3779	234.864	116.862		14.5177
		67.8221	359.113	173.924		17.8191
		83.0508	367.304	194.519		28.6962
			271.899	186.249		18.5048
			263.93			29.3734
						19.7975
						10.7137
						24.2474
						26.2911
						34.3488
						32.3906
						41.5155
						26.403

## Sheet: Fig 9 Supplement A-C
Fig 9 Sup A	Peak voltage deflection (mV)																					Fig 9 Sup B	Steady state voltage deflection (mV)																					Fig 9 Sup C	Voltage deflection deactivation time constant (ms)
	Control Cells
	LED Power mW/mm2	Mean	St Dev	n	Cell ID
					143	145	146	148	150	147	149
	30 (475 nm)	5.01865	2.23596	5	5.37751	5.05268	7.33064	5.99694	1.33546
	30 (575nm)	2.10719	0.833906	4		2.79647			2.8527	1.50381	1.27578
	GtACR2 Embryonic																						GtACR2 Embryonic																						GtACR2 Embryonic
	LED Power mW/mm2	Mean	St Dev	n	Cell ID						Mean	St Dev	n	Spike response									LED Power mW/mm2	Mean	St Dev	n	Cell ID																		LED Power mW/mm2	Mean	St Dev	n	Cell ID
		across irradiance levels			8	7	9	10	11	6	across irradiance levels			8	6									across irradiance levels			8	7	9	10	11	6														across irradiance levels			8
	1.05	#DIV/0!	#DIV/0!	0							#DIV/0!	#DIV/0!	0										1.05	#DIV/0!	#DIV/0!	0																			1.05	#DIV/0!	#DIV/0!	0
	2	#DIV/0!	#DIV/0!	0							#DIV/0!	#DIV/0!	0										2	#DIV/0!	#DIV/0!	0																			2	#DIV/0!	#DIV/0!	0
	2.79	23.3472	5.95938	4	28.699		15.1859	22.8353	26.6687		#DIV/0!	#DIV/0!	0										2.79	15.5603	#DIV/0!	1					15.5603														2.79	66.4778	11.2334	4	65.3859
	5.35	22.2715	5.39821	4	26.5322		14.6061	22.4386	25.5091		#DIV/0!	#DIV/0!	0										5.35	15.1331	#DIV/0!	1					15.1331														5.35	65.3647	10.6144	4	63.8218
	10	22.5233	5.50295	4	27.2647		14.8502	22.3775	25.6006		#DIV/0!	#DIV/0!	0										10	14.7974	#DIV/0!	1					14.7974														10	66.1346	10.9763	4	64.3409
	15	#DIV/0!	#DIV/0!	0							#DIV/0!	#DIV/0!	0										15	#DIV/0!	#DIV/0!	0																			15	#DIV/0!	#DIV/0!	0
	20.23	22.2868	5.85332	4	27.1426		14.1483	21.9808	25.8753		#DIV/0!	#DIV/0!	0										20.23	14.6753	#DIV/0!	1					14.6753														20.23	65.9657	10.8711	4	65.0125
	30.47	20.4478	3.09872	4		17.2717	18.3714	23.6277	22.5203		78.9409	3.72914	2	76.304	81.5778								30.47	11.0885	2.88049	3		13.2433			12.2054	7.81685													30.47	68.747	15.5099	6	69.0904
	GtACR1 Embryonic																						GtACR1 Embryonic																						GtACR1 Embryonic
	LED Power mW/mm2	Mean	St Dev	n	Cell ID							Mean	St Dev	n	Spike response								LED Power mW/mm2	Mean	St Dev	n	Cell ID																		LED Power mW/mm2	Mean	St Dev	n	Cell ID
		across irradiance levels			43	44	45	12	152	153	155	across irradiance levels			43	44	45	152						across irradiance levels			43	44	45	12	152	153	155													across irradiance levels			43
	1.05	19.0273	10.7446	6	33.5143	30.5105		15.5691	10.0726	7.17647	17.3209	106.838	#DIV/0!	1			106.838						1.05	13.3134	6.45199	7	17.6146	20.7753	21.2971	11.4187	7.93642	6.19991	7.95196												1.05	210.229	72.5722	7	278.462
	2	21.1178	10.6166	6	36.444	32.0668		16.6372	13.4601	10.1672	17.9312	105.739	#DIV/0!	1			105.739						2	13.9848	5.61326	7	17.7672	20.8364	20.5036	12.2427	10.2863	8.18355	8.07403												2	206.041	92.4417	7	282.071
	2.79	#DIV/0!	#DIV/0!	0								#DIV/0!	#DIV/0!	0									2.79	#DIV/0!	#DIV/0!	0																			2.79	#DIV/0!	#DIV/0!	0
	5.35	20.8968	6.5121	5		31.9448		18.4683	19.9909	14.6838	19.396	109.239	2.48881	2	110.998		107.479						5.35	14.9788	4.869	7	18.0114	21.2636	19.7712	13.616	13.5211	10.5334	8.13506												5.35	212.016	82.7242	7	271.198
	10	23.228	5.29614	5	29.2347	28.811		19.6579		19.0749	19.3613	101.779	14.0651	2			91.833	111.724					10	13.8455	4.15053	7	15.6239	17.7637	16.6987	14.1648	16.6313	8.69893	7.33735												10	213.781	55.3363	7	219.997
	15	#DIV/0!	#DIV/0!	0								#DIV/0!	#DIV/0!	0									15	#DIV/0!	#DIV/0!	0																			15	#DIV/0!	#DIV/0!	0
	20.23	19.5682	0.242948	3				19.6884		19.2885	19.7275	98.8327	6.41607	4	96.7091	96.8652	93.5725	108.184					20.23	13.7758	4.22881	7	14.922	17.4585	16.9734	14.9277	16.6313	8.14961	7.36787												20.23	190.773	46.3342	7	211.313
	30.47	19.3647	0.250513	3				19.3833		19.1054	19.6054	97.0169	9.14532	4	92.8334	93.4473	91.1311	110.656					30.47	14.0853	4.0413	7	14.7389	17.3974	16.7903	14.8972	17.8825	7.90547	8.9853												30.47	189.728	42.8809	7	219.936
	GtACR1 Larval																						GtACR1 Larval																						GtACR1 Larval
	LED Power mW/mm2	Mean	St Dev	n	Cell ID																		LED Power mW/mm2	Mean	St Dev	n	Cell ID																		LED Power mW/mm2	Mean	St Dev	n	Cell ID
		across irradiance levels			13	34	35	36	40	46	47	156												across irradiance levels			13	34	35	36	40	46	47	156												across irradiance levels			13
	1.05	8.51387	3.68418	8	1.58836	11.4887	10.836	9.50356	8.76706	11.3176	10.5436	4.06602											1.05	5.06919	2.09559	8	1.28319	7.09414	5.55649	6.87905	3.94529	6.12958	6.60688	3.05894											1.05	253.225	108.488	8	166.584
	2	9.28801	3.8984	7	2.25975	11.977	11.721		9.68259	12.5688	11.2456	5.56139											2	5.17249	1.87122	7	1.98509	7.33828	5.55649		4.43357	6.31268	6.72895	3.8524											2	255.157	101.707	7	109.596
	2.79	#DIV/0!	#DIV/0!	0																			2.79	#DIV/0!	#DIV/0!	0																			2.79	#DIV/0!	#DIV/0!	0
	5.35	9.86808	3.15486	8	3.29735	12.5568	11.8126	9.90029	9.40793	12.5078	11.7644	7.69762											5.35	5.52314	1.83911	8	3.02269	7.91811	5.52597	6.72646	2.93821	6.70941	6.69843	4.64586											5.35	270.678	87.5247	8	159.229
	10	8.8915	2.52125	6	3.85993	10.6863			9.82885	10.2199	9.12129	9.63275											10	4.80214	1.12261	6	3.58527	6.71901			4.24413	5.30655	4.90986	4.04803											10	295.282	104.241	6	167.856
	15	#DIV/0!	#DIV/0!	0																			15	#DIV/0!	#DIV/0!	0																			15	#DIV/0!	#DIV/0!	0
	20.23	9.37978	2.48337	6	4.40925	10.961			10.6833	10.5861	9.60957	10.0295											20.23	4.90387	0.919586	6	4.13459	6.65798			4.57982	4.94034	4.87934	4.23114											20.23	279.947	75.6101	6	189.606
	30.47	9.50694	2.30409	6	4.89753	10.9915			10.8054	10.5251	9.76216	10.06											30.47	5.16327	1.06194	6	4.53132	6.71901			4.27465	6.28311	4.81831	4.35321											30.47	292.986	94.3804	6	189.585
	eArch3.0																						eArch3.0																						eArch3.0
	LED Power mW/mm2	Mean	St Dev	n	Cell ID																		LED Power mW/mm2	Mean	St Dev	n	Cell ID																		LED Power mW/mm2	Mean	St Dev	n	Cell ID
		across irradiance levels			107	111																		across irradiance levels			107	111																		across irradiance levels			107
	1.05	#DIV/0!	#DIV/0!	0																			1.05	#DIV/0!	#DIV/0!	0																			1.05	#DIV/0!	#DIV/0!	0
	2	#DIV/0!	#DIV/0!	0																			2	#DIV/0!	#DIV/0!	0																			2	#DIV/0!	#DIV/0!	0
	2.79	#DIV/0!	#DIV/0!	0																			2.79	#DIV/0!	#DIV/0!	0																			2.79	#DIV/0!	#DIV/0!	0
	5.35	-11.7049	#DIV/0!	1	-11.7049																		5.35	-9.26347	#DIV/0!	1	-9.26347																		5.35	32.4763	#DIV/0!	1	32.4763
	10	-18.8308	4.96768	2	-15.3182	-22.3435																	10	-13.2492	3.05145	2	-11.0915	-15.4069																	10	30.2118	4.28359	2	33.2407
	15	-22.2015	7.73198	2	-16.7342	-27.6688																	15	-15.9286	5.7618	2	-11.8544	-20.0028																	15	32.4174	1.21885	2	33.2793
	20.23	-24.0905	8.59514	2	-18.0129	-30.1682																	20.23	-16.4917	6.52786	2	-11.8758	-21.1076																	20.23	32.3577	0.526062	2	32.7297
	30.47	-30.4826	#DIV/0!	1		-30.4826																	30.47	-19.8197	#DIV/0!	1		-19.8197																	30.47	31.8872	#DIV/0!	1
	eNpHR3.0																						eNpHR3.0																						eNpHR3.0
	LED Power mW/mm2	Mean	St Dev	n	Cell ID																		LED Power mW/mm2	Mean	St Dev	n	Cell ID																		LED Power mW/mm2	Mean	St Dev	n	Cell ID
		across irradiance levels			116	117	119	120	121	123	125	126	128	129	131	132	133	135	137	138				across irradiance levels			116	117	119	120	121	123	125	126	128	129	131	132	133	135	137	138				across irradiance levels			116
	1.05	#DIV/0!	#DIV/0!	0																			1.05	#DIV/0!	#DIV/0!	0																			1.05	#DIV/0!	#DIV/0!	0
	2	#DIV/0!	#DIV/0!	0																			2	#DIV/0!	#DIV/0!	0																			2	#DIV/0!	#DIV/0!	0
	2.79	#DIV/0!	#DIV/0!	0																			2.79	#DIV/0!	#DIV/0!	0																			2.79	#DIV/0!	#DIV/0!	0
	5.35	-8.61119	4.89912	12	-14.2676	-2.9009				-8.99958	-10.0387	-4.89932	-16.7079	-7.10274		-15.0904	-8.65067	-9.52041	-2.63958	-2.51649			5.35	-8.36604	4.83418	12	-13.9747	-2.63845				-8.87141	-9.58098	-4.81082	-16.3417	-7.01424		-14.7547	-8.37296	-9.2488	-2.48089	-2.30287			5.35	26.8474	12.6022	12	25.282
	10	-10.3229	5.76273	15	-17.8626	-4.58852	-9.62222	-4.23257	-7.78006	-11.2823	-12.8555	-6.91043	-20.9346	-8.66524		-20.1136	-10.1125	-12.9475	-3.34148	-3.59377			10	-9.83453	5.34824	16	-17.6185	-4.43898	-9.26821	-4.06778	-7.64883	-10.9802	-11.9339	-6.6846	-19.9977	-8.47298	-9.03119	-19.1858	-9.44717	-12.0869	-3.08514	-3.40456			10	25.4736	8.61922	16	31.5594
	15	-10.8193	5.6088	16	-19.3793	-5.33925	-11.7462	-5.4075	-9.7637	-12.1673	-12.7975	-6.99588	-21.194	-8.53706	-9.13495	-20.4157	-10.1949	-12.859	-3.40862	-3.76772			15	-10.5137	5.35986	16	-18.9063	-5.08901	-11.3556	-5.19083	-9.33646	-11.8408	-11.8912	-6.79752	-20.2052	-8.36617	-11.259	-19.4178	-9.51736	-12.2182	-3.21026	-3.61818			15	25.1344	7.17721	16	27.1091
	20.23	-12.0924	5.23505	12	-19.8005	-5.74819	-12.6068	-5.79202	-10.429	-11.3922	-12.9501	-7.21255	-19.7017	-8.04573	-11.6221	-19.8084							20.23	-11.552	5.0265	12	-19.3519	-5.45522	-11.9293	-5.49295	-10.0292	-10.9252	-11.8912	-6.91348	-18.7068	-7.81075	-11.2559	-18.8624							20.23	22.9732	5.66817	12	27.2434
	30.47	-9.86454	3.00674	4			-12.4085	-5.66995	-9.76981						-11.6099								30.47	-8.77615	3.17744	3			-11.6913	-5.38919	-9.24796														30.47	19.7628	5.80375	3
[truncated: 15 more columns]
