# Supplementary material for: A calibrated optogenetic toolbox of stable zebrafish opsin lines
Source: eLife. 2020 Mar 27;9:e54937. doi: 10.7554/eLife.54937 (PMC7170653; doi:10.7554/eLife.54937)
Supplement: Supplementary file 1. [file elife-54937-supp1.xlsx]

## Sheet: Opsins info
Opsin	Species of origin	Class	Peak absorption	Activation kinetics	Inactivation kinetics	Deactivation kinetics	Absolute peak photocurrent	Kinetics references	Cells used to record photocurrents	Original publication
CheRiff	Scherffelia dubia	Cation channel	460 nm	4.5 ms	400 ms	16 ms	2000 pA @ 5.00 mW/mm2, 488 nm	Hochbaum et al., 2014	cultured rat hippocampal neurons	Hochbaum et al., 2014
CoChR	Chloromonas oogama	Cation channel	470 nm	4.5 ms		85 ms	3300 pA @ 4.23 mW/mm2, 470 nm	Klapoetke et al., 2014	cultured rat hippocampal neurons	Klapoetke et al., 2014
ChR2(H134R)	Chlamydomonas reinhardtii	Cation channel	470 nm	9 ms	25 ms	23 ms	1400 pA @ 18 mW/mm2, 470 nm	Mattis et al. 2012	cultured rat hippocampal neurons	Gradinaru et al., 2007
Chronos	Stigeoclonium helveticum	Cation channel	500 nm	2.3 ms		3.6 ms	1000 pA @ 3.66 mW/mm2, 530 nm	Klapoetke et al., 2014	cultured rat hippocampal neurons	Klapoetke et al., 2014
ChrimsonR	Chlamydomonas noctigama	Cation channel	590 nm	7 ms		15.8 ms	674 pA @ 10 mW/mm2, 660 nm	Klapoetke et al., 2014	cultured rat hippocampal neurons	Klapoetke et al., 2014
GtACR2	Guillardia theta	Anion channel	470 nm			75.7 ms	7400 pA @ 7.6 mW/mm2, 470 nm	Govorunova et al. 2017	HEK293 cells	Govorunova et al. 2015
GtACR1	Guillardia theta	Anion channel	515 nm			128.4 ms	7500 pA @ 7.6 mW/mm2, 520 nm	Govorunova et al. 2017	HEK293 cells	Govorunova et al. 2015
eArch3.0	Halorubrum sodomense	Proton outward pump	566 nm	1.7 ms		5 ms	1500 pA @ 20 mW/mm2, 560 nm	Mattis et al. 2012	cultured rat hippocampal neurons	Mattis et al. 2012
eNpHR3.0	Natronomonas pharaonis	Chloride inward pump	590 nm	2.6 ms		4.2 ms	900 pA @ 20 mW/mm2, 590 nm	Mattis et al. 2012	cultured rat hippocampal neurons	Gradinaru et al., 2010
				Zebrafish primary motor neurons (5–6 dpf) @ 20 mW/mm2 irradiance
			Opsin	Activation kinetics	Inactivation kinetics	Deactivation kinetics	Absolute peak photocurrent
			CheRiff	4.5 ms		14.9 ms	53 pA @ 488 nm
			CoChR	4.9 ms		20.1 ms	493 pA @ 488 nm
			ChR2(H134R)	4.0 ms		15.2 ms	138 pA @ 488 nm
			Chronos	4.2 ms		4.3 ms	36 pA @ 488 nm
			ChrimsonR	4.8 ms		17.7 ms	265 pA @ 575 nm
			GtACR2	1.7 ms	178.6 ms	54.2 ms	707 pA @ 488 nm
			GtACR1 Embryonic	1.9 ms	205 ms	72.4 ms	1514 pA @ 520 nm
			GtACR1 Larval	1.5 ms	165.1 ms	236.6 ms	313 pA @ 520 nm
			eArch3.0	17.6 ms	646 ms	29.1 ms	179 pA @ 543 nm
			eNpHR3.0	18.8 ms	N/A	14.5 ms	123 pA @ 543 nm
