# Supplementary material for: A calibrated optogenetic toolbox of stable zebrafish opsin lines
Source: eLife. 2020 Mar 27;9:e54937. doi: 10.7554/eLife.54937 (PMC7170653; doi:10.7554/eLife.54937)
Supplement: Supplementary file 2. [file elife-54937-supp2.xlsx]

## Sheet: Figure 2F
Figure 2F	CheRiff	CoChR	ChR2(H134R)	Chronos	ChrimsonR	GtACR2	GtACR1	Uninjected
Irradiance-dependent modulation of reponse probability - linear regression on log-log transformed data (470 nm, 5 ms pulse duration)										Comparison of response probability between opsins (470 nm, 5 ms pulse duration, 5 μW/mm2)												Comparison of response probability between opsins (470 nm, 5 ms pulse duration, 25 μW/mm2)												Comparison of response probability between opsins (470 nm, 5 ms pulse duration, 112 μW/mm2)												Comparison of response probability between opsins (470 nm, 5 ms pulse duration, 235 μW/mm2)
Comparison of Fits										Kruskal-Wallis test												Kruskal-Wallis test												Kruskal-Wallis test												Kruskal-Wallis test
Null hypothesis	Slope = 0	Slope = 0	Slope = 0	Slope = 0	Slope = 0	Slope = 0	Slope = 0	Slope = 0		P value	0.0009											P value	0.1569											P value	<0.0001											P value	<0.0001
Alternative hypothesis	Slope unconstrained	Slope unconstrained	Slope unconstrained	Slope unconstrained	Slope unconstrained	Slope unconstrained	Slope unconstrained	Slope unconstrained		Exact or approximate P value?	Approximate											Exact or approximate P value?	Approximate											Exact or approximate P value?	Approximate											Exact or approximate P value?	Approximate
P value	0.818	<0.0001	<0.0001	0.0005	0.7865	<0.0001	<0.0001	0.2115		P value summary	***											P value summary	ns											P value summary	****											P value summary	****
Conclusion (alpha = 0.05)	Do not reject null hypothesis	Reject null hypothesis	Reject null hypothesis	Reject null hypothesis	Do not reject null hypothesis	Reject null hypothesis	Reject null hypothesis	Do not reject null hypothesis		Do the medians vary signif. (P < 0.05)?	Yes											Do the medians vary signif. (P < 0.05)?	No											Do the medians vary signif. (P < 0.05)?	Yes											Do the medians vary signif. (P < 0.05)?	Yes
Preferred model	Slope = 0	Slope unconstrained	Slope unconstrained	Slope unconstrained	Slope = 0	Slope unconstrained	Slope unconstrained	Slope = 0		Number of groups	8											Number of groups	8											Number of groups	8											Number of groups	8
F (DFn, DFd)	0.05306 (1, 258)	381.8 (1, 263)	15.73 (1, 283)	12.49 (1, 283)	0.07350 (1, 368)	143.2 (1, 448)	136.1 (1, 258)	1.565 (1, 533)		Kruskal-Wallis statistic	24.7											Kruskal-Wallis statistic	10.6											Kruskal-Wallis statistic	129.5											Kruskal-Wallis statistic	180.7
Slope unconstrained										Dunn's multiple comparisons test	Mean rank diff.	Significant?	Summary	Adjusted P Value	Mean rank 1	Mean rank 2	Mean rank diff.	n1	n2	Z		Dunn's multiple comparisons test	Mean rank diff.	Significant?	Summary	Adjusted P Value	Mean rank 1	Mean rank 2	Mean rank diff.	n1	n2	Z		Dunn's multiple comparisons test	Mean rank diff.	Significant?	Summary	Adjusted P Value	Mean rank 1	Mean rank 2	Mean rank diff.	n1	n2	Z		Dunn's multiple comparisons test	Mean rank diff.	Significant?	Summary
Best-fit values										CheRiff vs. CoChR	21.31	No	ns	>0.9999	276.6	255.3	21.31	52	53	0.9892		CheRiff vs. CoChR	4.37	No	ns	>0.9999	289.1	284.7	4.37	52	53	0.1952		CheRiff vs. CoChR	-230.9	Yes	****	<0.0001	223.3	454.3	-230.9	52	53	8.99		CheRiff vs. CoChR	-265.1	Yes	****
YIntercept	-1.093	-1.135	-1.825	-1.567	-1.065	-1.942	-2.031	-0.9019		CheRiff vs. ChR2	5.405	No	ns	>0.9999	276.6	271.2	5.405	52	57	0.2553		CheRiff vs. ChR2	33.77	No	ns	>0.9999	289.1	255.3	33.77	52	57	1.535		CheRiff vs. ChR2	-0.1555	No	ns	>0.9999	223.3	223.5	-0.1555	52	57	0.006162		CheRiff vs. ChR2	-23.13	No	ns
Slope	0.01592	0.4362	0.4245	0.3113	0.01594	0.6346	0.687	-0.05683		CheRiff vs. Chronos	9.098	No	ns	>0.9999	276.6	267.5	9.098	52	57	0.4298		CheRiff vs. Chronos	22.46	No	ns	>0.9999	289.1	266.7	22.46	52	57	1.021		CheRiff vs. Chronos	-9.568	No	ns	>0.9999	223.3	232.9	-9.568	52	57	0.3791		CheRiff vs. Chronos	-21.51	No	ns
Goodness of Fit										CheRiff vs. ChrimsonR	-14.92	No	ns	>0.9999	276.6	291.5	-14.92	52	74	0.7468		CheRiff vs. ChrimsonR	23.67	No	ns	>0.9999	289.1	265.4	23.67	52	74	1.14		CheRiff vs. ChrimsonR	-18.99	No	ns	>0.9999	223.3	242.3	-18.99	52	74	0.7974		CheRiff vs. ChrimsonR	-4.851	No	ns
Degrees of Freedom	258	263	283	283	368	448	258	533		CheRiff vs. GtACR2	12.89	No	ns	>0.9999	276.6	263.7	12.89	52	90	0.6705		CheRiff vs. GtACR2	38.42	No	ns	>0.9999	289.1	250.7	38.42	52	90	1.923		CheRiff vs. GtACR2	-51.5	No	ns	0.6909	223.3	274.8	-51.5	52	90	2.246		CheRiff vs. GtACR2	-106.9	Yes	***
R squared	0.0002056	0.5921	0.05266	0.04226	0.0001997	0.2423	0.3453	0.002927		CheRiff vs. WT	-22.84	No	ns	>0.9999	276.6	299.5	-22.84	52	107	1.224		CheRiff vs. WT	15.79	No	ns	>0.9999	289.1	273.3	15.79	52	107	0.8142		CheRiff vs. WT	-31.03	No	ns	>0.9999	223.3	254.4	-31.03	52	107	1.395		CheRiff vs. WT	-11.22	No	ns
Sum of Squares	6.155	22.91	14.91	12.58	9.697	48.12	23.11	16.5		CheRiff vs. GtACR1	61.62	No	ns	0.1239	276.6	215	61.62	52	52	2.846		CheRiff vs. GtACR1	-15.15	No	ns	>0.9999	289.1	304.3	-15.15	52	52	0.6736		CheRiff vs. GtACR1	-76.05	No	ns	0.09	223.3	299.4	-76.05	52	52	2.946		CheRiff vs. GtACR1	-130.4	Yes	****
Normality of Residuals										CoChR vs. ChR2	-15.91	No	ns	>0.9999	255.3	271.2	-15.91	53	57	0.7552		CoChR vs. ChR2	29.4	No	ns	>0.9999	284.7	255.3	29.4	53	57	1.343		CoChR vs. ChR2	230.8	Yes	****	<0.0001	454.3	223.5	230.8	53	57	9.19		CoChR vs. ChR2	242	Yes	****
D'Agostino-Pearson omnibus (K2)	61.95	1.114	134.1	110	92.58	23.53	5.751	166.6		CoChR vs. Chronos	-12.22	No	ns	>0.9999	255.3	267.5	-12.22	53	57	0.5799		CoChR vs. Chronos	18.09	No	ns	>0.9999	284.7	266.7	18.09	53	57	0.8263		CoChR vs. Chronos	221.4	Yes	****	<0.0001	454.3	232.9	221.4	53	57	8.815		CoChR vs. Chronos	243.6	Yes	****
P value	<0.0001	0.5728	<0.0001	<0.0001	<0.0001	<0.0001	0.0564	<0.0001		CoChR vs. ChrimsonR	-36.23	No	ns	>0.9999	255.3	291.5	-36.23	53	74	1.824		CoChR vs. ChrimsonR	19.3	No	ns	>0.9999	284.7	265.4	19.3	53	74	0.9349		CoChR vs. ChrimsonR	212	Yes	****	<0.0001	454.3	242.3	212	53	74	8.95		CoChR vs. ChrimsonR	260.2	Yes	****
Passed normality test (alpha=0.05)?	No	Yes	No	No	No	No	Yes	No		CoChR vs. GtACR2	-8.42	No	ns	>0.9999	255.3	263.7	-8.42	53	90	0.4406		CoChR vs. GtACR2	34.05	No	ns	>0.9999	284.7	250.7	34.05	53	90	1.714		CoChR vs. GtACR2	179.4	Yes	****	<0.0001	454.3	274.8	179.4	53	90	7.875		CoChR vs. GtACR2	158.2	Yes	****
P value summary	****	ns	****	****	****	****	ns	****		CoChR vs. WT	-44.16	No	ns	0.4829	255.3	299.5	-44.16	53	107	2.381		CoChR vs. WT	11.42	No	ns	>0.9999	284.7	273.3	11.42	53	107	0.5926		CoChR vs. WT	199.9	Yes	****	<0.0001	454.3	254.4	199.9	53	107	9.043		CoChR vs. WT	253.9	Yes	****
Test for homoscedasticity										CoChR vs. GtACR1	40.3	No	ns	>0.9999	255.3	215	40.3	53	52	1.87		CoChR vs. GtACR1	-19.52	No	ns	>0.9999	284.7	304.3	-19.52	53	52	0.872		CoChR vs. GtACR1	154.9	Yes	****	<0.0001	454.3	299.4	154.9	53	52	6.03		CoChR vs. GtACR1	134.7	Yes	****
Rs of predicted Y vs. |residual|	0.5058	-0.1714	0.6238	0.6112	0.4872	0.7032	0.7209	0.5386		ChR2 vs. Chronos	3.693	No	ns	>0.9999	271.2	267.5	3.693	57	57	0.1786		ChR2 vs. Chronos	-11.32	No	ns	>0.9999	255.3	266.7	-11.32	57	57	0.5266		ChR2 vs. Chronos	-9.412	No	ns	>0.9999	223.5	232.9	-9.412	57	57	0.3818		ChR2 vs. Chronos	1.614	No	ns
P value (one tailed)	<0.0001	0.0026	<0.0001	<0.0001	<0.0001	<0.0001	<0.0001	<0.0001		ChR2 vs. ChrimsonR	-20.32	No	ns	>0.9999	271.2	291.5	-20.32	57	74	1.045		ChR2 vs. ChrimsonR	-10.1	No	ns	>0.9999	255.3	265.4	-10.1	57	74	0.4998		ChR2 vs. ChrimsonR	-18.84	No	ns	>0.9999	223.5	242.3	-18.84	57	74	0.8121		ChR2 vs. ChrimsonR	18.28	No	ns
Passed (P > 0.05)?	No	No	No	No	No	No	No	No		ChR2 vs. GtACR2	7.488	No	ns	>0.9999	271.2	263.7	7.488	57	90	0.4007		ChR2 vs. GtACR2	4.648	No	ns	>0.9999	255.3	250.7	4.648	57	90	0.2393		ChR2 vs. GtACR2	-51.35	No	ns	0.5932	223.5	274.8	-51.35	57	90	2.305		ChR2 vs. GtACR2	-83.76	Yes	*
										ChR2 vs. WT	-28.25	No	ns	>0.9999	271.2	299.5	-28.25	57	107	1.561		ChR2 vs. WT	-17.98	No	ns	>0.9999	255.3	273.3	-17.98	57	107	0.9561		ChR2 vs. WT	-30.88	No	ns	>0.9999	223.5	254.4	-30.88	57	107	1.431		ChR2 vs. WT	11.91	No	ns
Slope = 0										ChR2 vs. GtACR1	56.21	No	ns	0.2218	271.2	215	56.21	57	52	2.655		ChR2 vs. GtACR1	-48.93	No	ns	0.7318	255.3	304.3	-48.93	57	52	2.224		ChR2 vs. GtACR1	-75.89	No	ns	0.0739	223.5	299.4	-75.89	57	52	3.007		ChR2 vs. GtACR1	-107.2	Yes	**
Best-fit values										Chronos vs. ChrimsonR	-24.02	No	ns	>0.9999	267.5	291.5	-24.02	57	74	1.235		Chronos vs. ChrimsonR	1.212	No	ns	>0.9999	266.7	265.4	1.212	57	74	0.05995		Chronos vs. ChrimsonR	-9.423	No	ns	>0.9999	232.9	242.3	-9.423	57	74	0.4063		Chronos vs. ChrimsonR	16.66	No	ns
YIntercept	-1.063	-0.256	-0.9431	-0.9384	-1.036	-0.5942	-0.5678	-1.004		Chronos vs. GtACR2	3.795	No	ns	>0.9999	267.5	263.7	3.795	57	90	0.2031		Chronos vs. GtACR2	15.96	No	ns	>0.9999	266.7	250.7	15.96	57	90	0.8221		Chronos vs. GtACR2	-41.93	No	ns	>0.9999	232.9	274.8	-41.93	57	90	1.882		Chronos vs. GtACR2	-85.37	Yes	**
Slope	= 0.000	= 0.000	= 0.000	= 0.000	= 0.000	= 0.000	= 0.000	= 0.000		Chronos vs. WT	-31.94	No	ns	>0.9999	267.5	299.5	-31.94	57	107	1.765		Chronos vs. WT	-6.669	No	ns	>0.9999	266.7	273.3	-6.669	57	107	0.3545		Chronos vs. WT	-21.47	No	ns	>0.9999	232.9	254.4	-21.47	57	107	0.9946		Chronos vs. WT	10.3	No	ns
Goodness of Fit										Chronos vs. GtACR1	52.52	No	ns	0.3669	267.5	215	52.52	57	52	2.481		Chronos vs. GtACR1	-37.61	No	ns	>0.9999	266.7	304.3	-37.61	57	52	1.71		Chronos vs. GtACR1	-66.48	No	ns	0.2362	232.9	299.4	-66.48	57	52	2.634		Chronos vs. GtACR1	-108.9	Yes	**
Degrees of Freedom	259	264	284	284	369	449	259	534		ChrimsonR vs. GtACR2	27.81	No	ns	>0.9999	291.5	263.7	27.81	74	90	1.606		ChrimsonR vs. GtACR2	14.75	No	ns	>0.9999	265.4	250.7	14.75	74	90	0.8195		ChrimsonR vs. GtACR2	-32.51	No	ns	>0.9999	242.3	274.8	-32.51	74	90	1.574		ChrimsonR vs. GtACR2	-102	Yes	****
R squared	-1.11e-15	-5.773e-15	-1.11e-15	1.221e-15	-3.997e-15	-4.663e-15	0	1.887e-15		ChrimsonR vs. WT	-7.924	No	ns	>0.9999	291.5	299.5	-7.924	74	107	0.4748		ChrimsonR vs. WT	-7.881	No	ns	>0.9999	265.4	273.3	-7.881	74	107	0.4544		ChrimsonR vs. WT	-12.04	No	ns	>0.9999	242.3	254.4	-12.04	74	107	0.6052		ChrimsonR vs. WT	-6.366	No	ns
Sum of Squares	6.157	56.17	15.74	13.14	9.699	63.5	35.31	16.55		ChrimsonR vs. GtACR1	76.53	Yes	**	0.0036	291.5	215	76.53	74	52	3.831		ChrimsonR vs. GtACR1	-38.82	No	ns	>0.9999	265.4	304.3	-38.82	74	52	1.87		ChrimsonR vs. GtACR1	-57.06	No	ns	0.4644	242.3	299.4	-57.06	74	52	2.396		ChrimsonR vs. GtACR1	-125.5	Yes	****
Normality of Residuals										GtACR2 vs. WT	-35.74	No	ns	0.6611	263.7	299.5	-35.74	90	107	2.263		GtACR2 vs. WT	-22.63	No	ns	>0.9999	250.7	273.3	-22.63	90	107	1.379		GtACR2 vs. WT	20.47	No	ns	>0.9999	274.8	254.4	20.47	90	107	1.087		GtACR2 vs. WT	95.67	Yes	****
D'Agostino-Pearson omnibus (K2)	62.17	1513	159.6	127.9	92.91	69.43	37.72	167.2		GtACR2 vs. GtACR1	48.72	No	ns	0.3159	263.7	215	48.72	90	52	2.534		GtACR2 vs. GtACR1	-53.57	No	ns	0.2054	250.7	304.3	-53.57	90	52	2.681		GtACR2 vs. GtACR1	-24.55	No	ns	>0.9999	274.8	299.4	-24.55	90	52	1.071		GtACR2 vs. GtACR1	-23.48	No	ns
P value	<0.0001	<0.0001	<0.0001	<0.0001	<0.0001	<0.0001	<0.0001	<0.0001		WT vs. GtACR1	84.46	Yes	***	0.0002	299.5	215	84.46	107	52	4.526		WT vs. GtACR1	-30.94	No	ns	>0.9999	273.3	304.3	-30.94	107	52	1.596		WT vs. GtACR1	-45.02	No	ns	>0.9999	254.4	299.4	-45.02	107	52	2.023		WT vs. GtACR1	-119.1	Yes	****
Passed normality test (alpha=0.05)?	No	No	No	No	No	No	No	No
P value summary	****	****	****	****	****	****	****	****
Irradiance-dependent modulation of reponse probability - linear regression on log-log transformed data (470 nm, 40 ms pulse duration)										Comparison of response probability between opsins (470 nm, 40 ms pulse duration, 5 μW/mm2)												Comparison of response probability between opsins (470 nm, 40 ms pulse duration, 25 μW/mm2)												Comparison of response probability between opsins (470 nm, 40 ms pulse duration, 112 μW/mm2)												Comparison of response probability between opsins (470 nm, 40 ms pulse duration, 235 μW/mm2)
Comparison of Fits										Kruskal-Wallis test												Kruskal-Wallis test												Kruskal-Wallis test												Kruskal-Wallis test
Null hypothesis	Slope = 0	Slope = 0	Slope = 0	Slope = 0	Slope = 0	Slope = 0	Slope = 0	Slope = 0		P value	0.0165											P value	<0.0001											P value	<0.0001											P value	<0.0001
Alternative hypothesis	Slope unconstrained	Slope unconstrained	Slope unconstrained	Slope unconstrained	Slope unconstrained	Slope unconstrained	Slope unconstrained	Slope unconstrained		Exact or approximate P value?	Approximate											Exact or approximate P value?	Approximate											Exact or approximate P value?	Approximate											Exact or approximate P value?	Approximate
P value	<0.0001	<0.0001	<0.0001	<0.0001	<0.0001	<0.0001	<0.0001	0.8396		P value summary	*											P value summary	****											P value summary	****											P value summary	****
Conclusion (alpha = 0.05)	Reject null hypothesis	Reject null hypothesis	Reject null hypothesis	Reject null hypothesis	Reject null hypothesis	Reject null hypothesis	Reject null hypothesis	Do not reject null hypothesis		Do the medians vary signif. (P < 0.05)?	Yes											Do the medians vary signif. (P < 0.05)?	Yes											Do the medians vary signif. (P < 0.05)?	Yes											Do the medians vary signif. (P < 0.05)?	Yes
Preferred model	Slope unconstrained	Slope unconstrained	Slope unconstrained	Slope unconstrained	Slope unconstrained	Slope unconstrained	Slope unconstrained	Slope = 0		Number of groups	8											Number of groups	8											Number of groups	8											Number of groups	8
F (DFn, DFd)	155.4 (1, 258)	196.1 (1, 263)	298.5 (1, 283)	214.1 (1, 283)	193.7 (1, 368)	295.0 (1, 448)	226.5 (1, 258)	0.04099 (1, 533)		Kruskal-Wallis statistic	17.15											Kruskal-Wallis statistic	193.8											Kruskal-Wallis statistic	227.1											Kruskal-Wallis statistic	246.5
Slope unconstrained										Dunn's multiple comparisons test	Mean rank diff.	Significant?	Summary	Adjusted P Value	Mean rank 1	Mean rank 2	Mean rank diff.	n1	n2	Z		Dunn's multiple comparisons test	Mean rank diff.	Significant?	Summary	Adjusted P Value	Mean rank 1	Mean rank 2	Mean rank diff.	n1	n2	Z		Dunn's multiple comparisons test	Mean rank diff.	Significant?	Summary	Adjusted P Value	Mean rank 1	Mean rank 2	Mean rank diff.	n1	n2	Z		Dunn's multiple comparisons test	Mean rank diff.	Significant?	Summary
Best-fit values										CheRiff vs. CoChR	-47.56	No	ns	0.7654	270.8	318.3	-47.56	52	53	2.207		CheRiff vs. CoChR	-253	Yes	****	<0.0001	221.5	474.5	-253	52	53	10.15		CheRiff vs. CoChR	-222.5	Yes	****	<0.0001	228.8	451.3	-222.5	52	53	7.911		CheRiff vs. CoChR	-128.6	Yes	***
YIntercept	-1.947	-0.4616	-1.526	-1.961	-3.525	-1.016	-1.021	-1.193		CheRiff vs. ChR2	1.374	No	ns	>0.9999	270.8	269.4	1.374	52	57	0.06491		CheRiff vs. ChR2	-14.39	No	ns	>0.9999	221.5	235.9	-14.39	52	57	0.5874		CheRiff vs. ChR2	-57.73	No	ns	>0.9999	228.8	286.5	-57.73	52	57	2.089		CheRiff vs. ChR2	-57.28	No	ns
Slope	0.6871	0.1892	0.5594	0.7002	1.242	0.3708	0.3796	0.01154		CheRiff vs. Chronos	4.848	No	ns	>0.9999	270.8	265.9	4.848	52	57	0.229		CheRiff vs. Chronos	5.749	No	ns	>0.9999	221.5	215.8	5.749	52	57	0.2346		CheRiff vs. Chronos	-12.67	No	ns	>0.9999	228.8	241.4	-12.67	52	57	0.4584		CheRiff vs. Chronos	-0.0008435	No	ns
Goodness of Fit										CheRiff vs. ChrimsonR	19.11	No	ns	>0.9999	270.8	251.7	19.11	52	74	0.9562		CheRiff vs. ChrimsonR	0.3493	No	ns	>0.9999	221.5	221.2	0.3493	52	74	0.01511		CheRiff vs. ChrimsonR	56.45	No	ns	0.8515	228.8	172.3	56.45	52	74	2.165		CheRiff vs. ChrimsonR	97.85	Yes	**
Degrees of Freedom	258	263	283	283	368	448	258	533		CheRiff vs. GtACR2	16.18	No	ns	>0.9999	270.8	254.6	16.18	52	90	0.8412		CheRiff vs. GtACR2	-89.56	Yes	**	0.0016	221.5	311.1	-89.56	52	90	4.024		CheRiff vs. GtACR2	-126.6	Yes	****	<0.0001	228.8	355.4	-126.6	52	90	5.044		CheRiff vs. GtACR2	-63.29	No	ns
R squared	0.3759	0.4271	0.5133	0.4307	0.3449	0.397	0.4675	7.689e-05		CheRiff vs. WT	2.634	No	ns	>0.9999	270.8	268.1	2.634	52	107	0.1411		CheRiff vs. WT	-6.256	No	ns	>0.9999	221.5	227.8	-6.256	52	107	0.2897		CheRiff vs. WT	59.82	No	ns	0.3943	228.8	169	59.82	52	107	2.455		CheRiff vs. WT	159.6	Yes	****
Sum of Squares	29.14	21.09	26.51	28.35	28.61	56.63	27.05	10.6		CheRiff vs. GtACR1	-26.58	No	ns	>0.9999	270.8	297.3	-26.58	52	52	1.227		CheRiff vs. GtACR1	-86.03	Yes	*	0.0167	221.5	307.6	-86.03	52	52	3.433		CheRiff vs. GtACR1	-125.6	Yes	***	0.0002	228.8	354.4	-125.6	52	52	4.443		CheRiff vs. GtACR1	-86.26	No	ns
Normality of Residuals										CoChR vs. ChR2	48.94	No	ns	0.5659	318.3	269.4	48.94	53	57	2.322		CoChR vs. ChR2	238.6	Yes	****	<0.0001	474.5	235.9	238.6	53	57	9.787		CoChR vs. ChR2	164.8	Yes	****	<0.0001	451.3	286.5	164.8	53	57	5.993		CoChR vs. ChR2	71.28	No	ns
D'Agostino-Pearson omnibus (K2)	0.8786	14.16	0.8289	0.06132	15.98	4.088	1.138	184.8		CoChR vs. Chronos	52.41	No	ns	0.3604	318.3	265.9	52.41	53	57	2.487		CoChR vs. Chronos	258.7	Yes	****	<0.0001	474.5	215.8	258.7	53	57	10.61		CoChR vs. Chronos	209.9	Yes	****	<0.0001	451.3	241.4	209.9	53	57	7.631		CoChR vs. Chronos	128.6	Yes	***
P value	0.6445	0.0008	0.6607	0.9698	0.0003	0.1295	0.566	<0.0001		CoChR vs. ChrimsonR	66.67	Yes	*	0.0222	318.3	251.7	66.67	53	74	3.355		CoChR vs. ChrimsonR	253.3	Yes	****	<0.0001	474.5	221.2	253.3	53	74	11.02		CoChR vs. ChrimsonR	279	Yes	****	<0.0001	451.3	172.3	279	53	74	10.76		CoChR vs. ChrimsonR	226.4	Yes	****
Passed normality test (alpha=0.05)?	Yes	No	Yes	Yes	No	Yes	Yes	No		CoChR vs. GtACR2	63.74	Yes	*	0.024	318.3	254.6	63.74	53	90	3.334		CoChR vs. GtACR2	163.4	Yes	****	<0.0001	474.5	311.1	163.4	53	90	7.388		CoChR vs. GtACR2	95.92	Yes	**	0.0034	451.3	355.4	95.92	53	90	3.844		CoChR vs. GtACR2	65.26	No	ns
P value summary	ns	***	ns	ns	***	ns	ns	****		CoChR vs. WT	50.19	No	ns	0.1905	318.3	268.1	50.19	53	107	2.706		CoChR vs. WT	246.7	Yes	****	<0.0001	474.5	227.8	246.7	53	107	11.5		CoChR vs. WT	282.3	Yes	****	<0.0001	451.3	169	282.3	53	107	11.66		CoChR vs. WT	288.2	Yes	****
Test for homoscedasticity										CoChR vs. GtACR1	20.98	No	ns	>0.9999	318.3	297.3	20.98	53	52	0.9736		CoChR vs. GtACR1	167	Yes	****	<0.0001	474.5	307.6	167	53	52	6.695		CoChR vs. GtACR1	96.95	Yes	*	0.0159	451.3	354.4	96.95	53	52	3.446		CoChR vs. GtACR1	42.3	No	ns
Rs of predicted Y vs. |residual|	0.5887	-0.7199	0.3147	0.5772	0.7593	-0.1325	-0.138	0.6104		ChR2 vs. Chronos	3.474	No	ns	>0.9999	269.4	265.9	3.474	57	57	0.1679		ChR2 vs. Chronos	20.14	No	ns	>0.9999	235.9	215.8	20.14	57	57	0.8416		ChR2 vs. Chronos	45.06	No	ns	>0.9999	286.5	241.4	45.06	57	57	1.669		ChR2 vs. Chronos	57.28	No	ns
P value (one tailed)	<0.0001	<0.0001	<0.0001	<0.0001	<0.0001	0.0024	0.013	<0.0001		ChR2 vs. ChrimsonR	17.73	No	ns	>0.9999	269.4	251.7	17.73	57	74	0.9112		ChR2 vs. ChrimsonR	14.74	No	ns	>0.9999	235.9	221.2	14.74	57	74	0.6547		ChR2 vs. ChrimsonR	114.2	Yes	***	0.0002	286.5	172.3	114.2	57	74	4.496		ChR2 vs. ChrimsonR	155.1	Yes	****
Passed (P > 0.05)?	No	No	No	No	No	No	No	No		ChR2 vs. GtACR2	14.81	No	ns	>0.9999	269.4	254.6	14.81	57	90	0.7921		ChR2 vs. GtACR2	-75.17	Yes	*	0.0143	235.9	311.1	-75.17	57	90	3.476		ChR2 vs. GtACR2	-68.89	No	ns	0.133	286.5	355.4	-68.89	57	90	2.824		ChR2 vs. GtACR2	-6.011	No	ns
										ChR2 vs. WT	1.259	No	ns	>0.9999	269.4	268.1	1.259	57	107	0.06954		ChR2 vs. WT	8.135	No	ns	>0.9999	235.9	227.8	8.135	57	107	0.3883		ChR2 vs. WT	117.5	Yes	****	<0.0001	286.5	169	117.5	57	107	4.974		ChR2 vs. WT	216.9	Yes	****
Slope = 0										ChR2 vs. GtACR1	-27.95	No	ns	>0.9999	269.4	297.3	-27.95	57	52	1.32		ChR2 vs. GtACR1	-71.64	No	ns	0.0968	235.9	307.6	-71.64	57	52	2.924		ChR2 vs. GtACR1	-67.86	No	ns	0.3942	286.5	354.4	-67.86	57	52	2.455		ChR2 vs. GtACR1	-28.98	No	ns
Best-fit values										Chronos vs. ChrimsonR	14.26	No	ns	>0.9999	265.9	251.7	14.26	57	74	0.7327		Chronos vs. ChrimsonR	-5.4	No	ns	>0.9999	215.8	221.2	-5.4	57	74	0.2398		Chronos vs. ChrimsonR	69.12	No	ns	0.182	241.4	172.3	69.12	57	74	2.722		Chronos vs. ChrimsonR	97.85	Yes	**
YIntercept	-0.4808	-0.09824	-0.3638	-0.4654	-0.6823	-0.2742	-0.2596	-1.172		Chronos vs. GtACR2	11.33	No	ns	>0.9999	265.9	254.6	11.33	57	90	0.6063		Chronos vs. GtACR2	-95.31	Yes	***	0.0003	215.8	311.1	-95.31	57	90	4.407		Chronos vs. GtACR2	-113.9	Yes	****	<0.0001	241.4	355.4	-113.9	57	90	4.671		Chronos vs. GtACR2	-63.29	No	ns
Slope	= 0.000	= 0.000	= 0.000	= 0.000	= 0.000	= 0.000	= 0.000	= 0.000		Chronos vs. WT	-2.214	No	ns	>0.9999	265.9	268.1	-2.214	57	107	0.1223		Chronos vs. WT	-12	No	ns	>0.9999	215.8	227.8	-12	57	107	0.573		Chronos vs. WT	72.48	No	ns	0.0605	241.4	169	72.48	57	107	3.067		Chronos vs. WT	159.6	Yes	****
Goodness of Fit										Chronos vs. GtACR1	-31.43	No	ns	>0.9999	265.9	297.3	-31.43	57	52	1.484		Chronos vs. GtACR1	-91.78	Yes	**	0.005	215.8	307.6	-91.78	57	52	3.746		Chronos vs. GtACR1	-112.9	Yes	**	0.0012	241.4	354.4	-112.9	57	52	4.086		Chronos vs. GtACR1	-86.26	No	ns
Degrees of Freedom	259	264	284	284	369	449	259	534		ChrimsonR vs. GtACR2	-2.927	No	ns	>0.9999	251.7	254.6	-2.927	74	90	0.1689		ChrimsonR vs. GtACR2	-89.91	Yes	***	0.0002	221.2	311.1	-89.91	74	90	4.485		ChrimsonR vs. GtACR2	-183.1	Yes	****	<0.0001	172.3	355.4	-183.1	74	90	8.095		ChrimsonR vs. GtACR2	-161.1	Yes	****
R squared	1.776e-15	4.219e-15	-1.332e-15	-2.442e-15	-6.661e-16	0	0	-5.773e-15		ChrimsonR vs. WT	-16.47	No	ns	>0.9999	251.7	268.1	-16.47	74	107	0.9867		ChrimsonR vs. WT	-6.605	No	ns	>0.9999	221.2	227.8	-6.605	74	107	0.3419		ChrimsonR vs. WT	3.362	No	ns	>0.9999	172.3	169	3.362	74	107	0.1543		ChrimsonR vs. WT	61.77	No	ns
Sum of Squares	46.7	36.82	54.48	49.8	43.67	93.91	50.79	10.6		ChrimsonR vs. GtACR1	-45.68	No	ns	0.6226	251.7	297.3	-45.68	74	52	2.286		ChrimsonR vs. GtACR1	-86.38	Yes	**	0.0052	221.2	307.6	-86.38	74	52	3.736		ChrimsonR vs. GtACR1	-182	Yes	****	<0.0001	172.3	354.4	-182	74	52	6.98		ChrimsonR vs. GtACR1	-184.1	Yes	****
Normality of Residuals										GtACR2 vs. WT	-13.55	No	ns	>0.9999	254.6	268.1	-13.55	90	107	0.8577		GtACR2 vs. WT	83.31	Yes	***	0.0001	311.1	227.8	83.31	90	107	4.559		GtACR2 vs. WT	186.4	Yes	****	<0.0001	355.4	169	186.4	90	107	9.044		GtACR2 vs. WT	222.9	Yes	****
D'Agostino-Pearson omnibus (K2)	165.1	60.79	1916	232.2	81.68	2196	1667	185		GtACR2 vs. GtACR1	-42.76	No	ns	0.7341	254.6	297.3	-42.76	90	52	2.223		GtACR2 vs. GtACR1	3.533	No	ns	>0.9999	311.1	307.6	3.533	90	52	0.1587		GtACR2 vs. GtACR1	1.029	No	ns	>0.9999	355.4	354.4	1.029	90	52	0.04099		GtACR2 vs. GtACR1	-22.97	No	ns
P value	<0.0001	<0.0001	<0.0001	<0.0001	<0.0001	<0.0001	<0.0001	<0.0001		WT vs. GtACR1	-29.21	No	ns	>0.9999	268.1	297.3	-29.21	107	52	1.565		WT vs. GtACR1	-79.77	Yes	**	0.0062	227.8	307.6	-79.77	107	52	3.694		WT vs. GtACR1	-185.4	Yes	****	<0.0001	169	354.4	-185.4	107	52	7.61		WT vs. GtACR1	-245.9	Yes	****
Passed normality test (alpha=0.05)?	No	No	No	No	No	No	No	No
P value summary	****	****	****	****	****	****	****	****
Irradiance-dependent modulation of reponse probability - linear regression on log-log transformed data (590 nm, 40 ms pulse duration)										Comparison of response probability between opsins (590 nm, 40 ms pulse duration, 4.5 μW/mm2)												Comparison of response probability between opsins (590 nm, 40 ms pulse duration, 19 μW/mm2)												Comparison of response probability between opsins (590 nm, 40 ms pulse duration, 107 μW/mm2)												Comparison of response probability between opsins (590 nm, 40 ms pulse duration, 246 μW/mm2)
Comparison of Fits										Kruskal-Wallis test												Kruskal-Wallis test												Kruskal-Wallis test												Kruskal-Wallis test
Null hypothesis	Slope = 0	Slope = 0	Slope = 0	Slope = 0	Slope = 0	Slope = 0	Slope = 0	Slope = 0		P value	0.0001											P value	0.0256											P value	<0.0001											P value	<0.0001
Alternative hypothesis	Slope unconstrained	Slope unconstrained	Slope unconstrained	Slope unconstrained	Slope unconstrained	Slope unconstrained	Slope unconstrained	Slope unconstrained		Exact or approximate P value?	Approximate											Exact or approximate P value?	Approximate											Exact or approximate P value?	Approximate											Exact or approximate P value?	Approximate
P value	0.557	0.093	0.037	0.5822	<0.0001	0.9024	<0.0001	0.2223		P value summary	***											P value summary	*											P value summary	****											P value summary	****
Conclusion (alpha = 0.05)	Do not reject null hypothesis	Do not reject null hypothesis	Reject null hypothesis	Do not reject null hypothesis	Reject null hypothesis	Do not reject null hypothesis	Reject null hypothesis	Do not reject null hypothesis		Do the medians vary signif. (P < 0.05)?	Yes											Do the medians vary signif. (P < 0.05)?	Yes											Do the medians vary signif. (P < 0.05)?	Yes											Do the medians vary signif. (P < 0.05)?	Yes
Preferred model	Slope = 0	Slope = 0	Slope unconstrained	Slope = 0	Slope unconstrained	Slope = 0	Slope unconstrained	Slope = 0		Number of groups	8											Number of groups	8											Number of groups	8											Number of groups	8
F (DFn, DFd)	0.3458 (1, 258)	2.842 (1, 263)	4.390 (1, 283)	0.3034 (1, 283)	284.9 (1, 553)	0.01505 (1, 448)	33.34 (1, 258)	1.493 (1, 533)		Kruskal-Wallis statistic	29.32											Kruskal-Wallis statistic	15.94											Kruskal-Wallis statistic	80.08											Kruskal-Wallis statistic	155.3
Slope unconstrained										Dunn's multiple comparisons test	Mean rank diff.	Significant?	Summary	Adjusted P Value	Mean rank 1	Mean rank 2	Mean rank diff.	n1	n2	Z		Dunn's multiple comparisons test	Mean rank diff.	Significant?	Summary	Adjusted P Value	Mean rank 1	Mean rank 2	Mean rank diff.	n1	n2	Z		Dunn's multiple comparisons test	Mean rank diff.	Significant?	Summary	Adjusted P Value	Mean rank 1	Mean rank 2	Mean rank diff.	n1	n2	Z		Dunn's multiple comparisons test	Mean rank diff.	Significant?	Summary
Best-fit values										CheRiff vs. CoChR	23	No	ns	>0.9999	267.8	244.8	23	52	53	0.9387		CheRiff vs. CoChR	76.51	No	ns	0.091	336.6	260.1	76.51	52	53	2.943		CheRiff vs. CoChR	27.22	No	ns	>0.9999	280.1	252.9	27.22	52	53	1.007		CheRiff vs. CoChR	34.52	No	ns
YIntercept	-0.9808	-1.424	-1.441	-0.8321	-1.454	-1.09	-1.613	-0.995		CheRiff vs. ChR2	24.81	No	ns	>0.9999	267.8	242.9	24.81	52	57	1.03		CheRiff vs. ChR2	62.8	No	ns	0.3906	336.6	273.8	62.8	52	57	2.459		CheRiff vs. ChR2	40.14	No	ns	>0.9999	280.1	240	40.14	52	57	1.511		CheRiff vs. ChR2	7.088	No	ns
Slope	0.03302	0.1373	0.1642	-0.03036	0.5119	-0.007613	0.44	0.05474		CheRiff vs. Chronos	-55.29	No	ns	0.6063	267.8	323.1	-55.29	52	57	2.296		CheRiff vs. Chronos	38.81	No	ns	>0.9999	336.6	297.8	38.81	52	57	1.519		CheRiff vs. Chronos	-4.648	No	ns	>0.9999	280.1	284.8	-4.648	52	57	0.1749		CheRiff vs. Chronos	-11.22	No	ns
Goodness of Fit										CheRiff vs. ChrimsonR	-30.65	No	ns	>0.9999	267.8	298.4	-30.65	52	111	1.453		CheRiff vs. ChrimsonR	25.59	No	ns	>0.9999	336.6	311	25.59	52	111	1.143		CheRiff vs. ChrimsonR	-108	Yes	****	<0.0001	280.1	388.1	-108	52	111	4.64		CheRiff vs. ChrimsonR	-175.9	Yes	****
Degrees of Freedom	258	263	283	283	553	448	258	533		CheRiff vs. GtACR2	-11.49	No	ns	>0.9999	267.8	279.3	-11.49	52	90	0.5254		CheRiff vs. GtACR2	63.71	No	ns	0.1689	336.6	272.9	63.71	52	90	2.746		CheRiff vs. GtACR2	39.35	No	ns	>0.9999	280.1	240.8	39.35	52	90	1.631		CheRiff vs. GtACR2	39.34	No	ns
R squared	0.001339	0.01069	0.01528	0.001071	0.34	3.359e-05	0.1144	0.002793		CheRiff vs. WT	-50.78	No	ns	0.4688	267.8	318.5	-50.78	52	107	2.392		CheRiff vs. WT	61.71	No	ns	0.1716	336.6	274.9	61.71	52	107	2.741		CheRiff vs. WT	3.728	No	ns	>0.9999	280.1	276.4	3.728	52	107	0.1592		CheRiff vs. WT	-13.81	No	ns
Sum of Squares	9.039	5.314	6.393	10.82	57.53	12.31	17.32	20.8		CheRiff vs. GtACR1	-47.88	No	ns	>0.9999	267.8	315.6	-47.88	52	52	1.944		CheRiff vs. GtACR1	37.49	No	ns	>0.9999	336.6	299.1	37.49	52	52	1.435		CheRiff vs. GtACR1	-21.88	No	ns	>0.9999	280.1	302	-21.88	52	52	0.8051		CheRiff vs. GtACR1	-92.33	Yes	*
Normality of Residuals										CoChR vs. ChR2	1.807	No	ns	>0.9999	244.8	242.9	1.807	53	57	0.07543		CoChR vs. ChR2	-13.71	No	ns	>0.9999	260.1	273.8	-13.71	53	57	0.5396		CoChR vs. ChR2	12.92	No	ns	>0.9999	252.9	240	12.92	53	57	0.4888		CoChR vs. ChR2	-27.43	No	ns
D'Agostino-Pearson omnibus (K2)	54	103.6	106.5	51.29	22.14	203.6	53.34	103.7		CoChR vs. Chronos	-78.3	Yes	*	0.0303	244.8	323.1	-78.3	53	57	3.268		CoChR vs. Chronos	-37.71	No	ns	>0.9999	260.1	297.8	-37.71	53	57	1.484		CoChR vs. Chronos	-31.87	No	ns	>0.9999	252.9	284.8	-31.87	53	57	1.205		CoChR vs. Chronos	-45.73	No	ns
P value	<0.0001	<0.0001	<0.0001	<0.0001	<0.0001	<0.0001	<0.0001	<0.0001		CoChR vs. ChrimsonR	-53.66	No	ns	0.2936	244.8	298.4	-53.66	53	111	2.559		CoChR vs. ChrimsonR	-50.92	No	ns	0.6171	260.1	311	-50.92	53	111	2.29		CoChR vs. ChrimsonR	-135.3	Yes	****	<0.0001	252.9	388.1	-135.3	53	111	5.847		CoChR vs. ChrimsonR	-210.4	Yes	****
Passed normality test (alpha=0.05)?	No	No	No	No	No	No	No	No		CoChR vs. GtACR2	-34.5	No	ns	>0.9999	244.8	279.3	-34.5	53	90	1.587		CoChR vs. GtACR2	-12.8	No	ns	>0.9999	260.1	272.9	-12.8	53	90	0.5551		CoChR vs. GtACR2	12.13	No	ns	>0.9999	252.9	240.8	12.13	53	90	0.5057		CoChR vs. GtACR2	4.826	No	ns
P value summary	****	****	****	****	****	****	****	****		CoChR vs. WT	-73.78	Yes	*	0.0131	244.8	318.5	-73.78	53	107	3.498		CoChR vs. WT	-14.8	No	ns	>0.9999	260.1	274.9	-14.8	53	107	0.6615		CoChR vs. WT	-23.49	No	ns	>0.9999	252.9	276.4	-23.49	53	107	1.009		CoChR vs. WT	-48.33	No	ns
Test for homoscedasticity										CoChR vs. GtACR1	-70.88	No	ns	0.1071	244.8	315.6	-70.88	53	52	2.892		CoChR vs. GtACR1	-39.02	No	ns	>0.9999	260.1	299.1	-39.02	53	52	1.501		CoChR vs. GtACR1	-49.09	No	ns	>0.9999	252.9	302	-49.09	53	52	1.815		CoChR vs. GtACR1	-126.8	Yes	***
Rs of predicted Y vs. |residual|	0.4382	0.7009	0.6848	0.3648	0.461	0.5843	0.2945	0.4098		ChR2 vs. Chronos	-80.11	Yes	*	0.0185	242.9	323.1	-80.11	57	57	3.406		ChR2 vs. Chronos	-23.99	No	ns	>0.9999	273.8	297.8	-23.99	57	57	0.9616		ChR2 vs. Chronos	-44.79	No	ns	>0.9999	240	284.8	-44.79	57	57	1.726		ChR2 vs. Chronos	-18.31	No	ns
P value (one tailed)	<0.0001	<0.0001	<0.0001	<0.0001	<0.0001	<0.0001	<0.0001	<0.0001		ChR2 vs. ChrimsonR	-55.46	No	ns	0.1879	242.9	298.4	-55.46	57	111	2.711		ChR2 vs. ChrimsonR	-37.21	No	ns	>0.9999	273.8	311	-37.21	57	111	1.714		ChR2 vs. ChrimsonR	-148.2	Yes	****	<0.0001	240	388.1	-148.2	57	111	6.563		ChR2 vs. ChrimsonR	-183	Yes	****
Passed (P > 0.05)?	No	No	No	No	No	No	No	No		ChR2 vs. GtACR2	-36.3	No	ns	>0.9999	242.9	279.3	-36.3	57	90	1.708		ChR2 vs. GtACR2	0.9117	No	ns	>0.9999	273.8	272.9	0.9117	57	90	0.04044		ChR2 vs. GtACR2	-0.793	No	ns	>0.9999	240	240.8	-0.793	57	90	0.03381		ChR2 vs. GtACR2	32.25	No	ns
										ChR2 vs. WT	-75.59	Yes	**	0.0068	242.9	318.5	-75.59	57	107	3.671		ChR2 vs. WT	-1.084	No	ns	>0.9999	273.8	274.9	-1.084	57	107	0.04965		ChR2 vs. WT	-36.41	No	ns	>0.9999	240	276.4	-36.41	57	107	1.603		ChR2 vs. WT	-20.9	No	ns
Slope = 0										ChR2 vs. GtACR1	-72.69	No	ns	0.0711	242.9	315.6	-72.69	57	52	3.019		ChR2 vs. GtACR1	-25.31	No	ns	>0.9999	273.8	299.1	-25.31	57	52	0.9908		ChR2 vs. GtACR1	-62.02	No	ns	0.5483	240	302	-62.02	57	52	2.334		ChR2 vs. GtACR1	-99.42	Yes	*
Best-fit values										Chronos vs. ChrimsonR	24.64	No	ns	>0.9999	323.1	298.4	24.64	57	111	1.204		Chronos vs. ChrimsonR	-13.21	No	ns	>0.9999	297.8	311	-13.21	57	111	0.6089		Chronos vs. ChrimsonR	-103.4	Yes	***	0.0001	284.8	388.1	-103.4	57	111	4.58		Chronos vs. ChrimsonR	-164.6	Yes	****
YIntercept	-0.9218	-1.172	-1.136	-0.8854	-0.4224	-1.104	-0.7277	-0.8961		Chronos vs. GtACR2	43.8	No	ns	>0.9999	323.1	279.3	43.8	57	90	2.061		Chronos vs. GtACR2	24.9	No	ns	>0.9999	297.8	272.9	24.9	57	90	1.104		Chronos vs. GtACR2	44	No	ns	>0.9999	284.8	240.8	44	57	90	1.876		Chronos vs. GtACR2	50.56	No	ns
Slope	= 0.000	= 0.000	= 0.000	= 0.000	= 0.000	= 0.000	= 0.000	= 0.000		Chronos vs. WT	4.515	No	ns	>0.9999	323.1	318.5	4.515	57	107	0.2193		Chronos vs. WT	22.91	No	ns	>0.9999	297.8	274.9	22.91	57	107	1.049		Chronos vs. WT	8.375	No	ns	>0.9999	284.8	276.4	8.375	57	107	0.3687		Chronos vs. WT	-2.595	No	ns
Goodness of Fit										Chronos vs. GtACR1	7.418	No	ns	>0.9999	323.1	315.6	7.418	57	52	0.3081		Chronos vs. GtACR1	-1.315	No	ns	>0.9999	297.8	299.1	-1.315	57	52	0.0515		Chronos vs. GtACR1	-17.23	No	ns	>0.9999	284.8	302	-17.23	57	52	0.6484		Chronos vs. GtACR1	-81.11	No	ns
Degrees of Freedom	259	264	284	284	554	449	259	534		ChrimsonR vs. GtACR2	19.16	No	ns	>0.9999	298.4	279.3	19.16	111	90	1.076		ChrimsonR vs. GtACR2	38.12	No	ns	>0.9999	311	272.9	38.12	111	90	2.018		ChrimsonR vs. GtACR2	147.4	Yes	****	<0.0001	388.1	240.8	147.4	111	90	7.5		ChrimsonR vs. GtACR2	215.2	Yes	****
R squared	1.554e-15	2.442e-15	9.992e-16	-3.109e-15	-5.995e-15	4.996e-15	-6.661e-16	3.775e-15		ChrimsonR vs. WT	-20.13	No	ns	>0.9999	298.4	318.5	-20.13	111	107	1.183		ChrimsonR vs. WT	36.12	No	ns	>0.9999	311	274.9	36.12	111	107	2.002		ChrimsonR vs. WT	111.8	Yes	****	<0.0001	388.1	276.4	111.8	111	107	5.954		ChrimsonR vs. WT	162.1	Yes	****
Sum of Squares	9.051	5.372	6.492	10.83	87.16	12.31	19.56	20.86		ChrimsonR vs. GtACR1	-17.22	No	ns	>0.9999	298.4	315.6	-17.22	111	52	0.8163		ChrimsonR vs. GtACR1	11.9	No	ns	>0.9999	311	299.1	11.9	111	52	0.5316		ChrimsonR vs. GtACR1	86.16	Yes	**	0.006	388.1	302	86.16	111	52	3.701		ChrimsonR vs. GtACR1	83.54	Yes	*
Normality of Residuals										GtACR2 vs. WT	-39.29	No	ns	0.8034	279.3	318.5	-39.29	90	107	2.188		GtACR2 vs. WT	-1.996	No	ns	>0.9999	272.9	274.9	-1.996	90	107	0.1048		GtACR2 vs. WT	-35.62	No	ns	>0.9999	240.8	276.4	-35.62	90	107	1.798		GtACR2 vs. WT	-53.15	No	ns
D'Agostino-Pearson omnibus (K2)	53.25	102.8	110.8	51.99	777.8	203.4	82.26	105.2		GtACR2 vs. GtACR1	-36.38	No	ns	>0.9999	279.3	315.6	-36.38	90	52	1.664		GtACR2 vs. GtACR1	-26.22	No	ns	>0.9999	272.9	299.1	-26.22	90	52	1.13		GtACR2 vs. GtACR1	-61.22	No	ns	0.3131	240.8	302	-61.22	90	52	2.537		GtACR2 vs. GtACR1	-131.7	Yes	****
P value	<0.0001	<0.0001	<0.0001	<0.0001	<0.0001	<0.0001	<0.0001	<0.0001		WT vs. GtACR1	2.903	No	ns	>0.9999	318.5	315.6	2.903	107	52	0.1368		WT vs. GtACR1	-24.22	No	ns	>0.9999	274.9	299.1	-24.22	107	52	1.076		WT vs. GtACR1	-25.6	No	ns	>0.9999	276.4	302	-25.6	107	52	1.093		WT vs. GtACR1	-78.51	Yes	*
Passed normality test (alpha=0.05)?	No	No	No	No	No	No	No	No
P value summary	****	****	****	****	****	****	****	****
[truncated: 20 more columns]

## Sheet: Figure 2G
Figure 2G	CheRiff	CoChR	ChR2(H134R)	Chronos	ChrimsonR	GtACR2	GtACR1	WT
Irradiance-dependent modulation of reponse probability - linear regression on log-log transformed data (470 nm, 5 ms pulse duration)										Comparison of response probability between opsins (470 nm, 5 ms pulse duration, 5 μW/mm2)												Comparison of response probability between opsins (470 nm, 5 ms pulse duration, 25 μW/mm2)												Comparison of response probability between opsins (470 nm, 5 ms pulse duration, 112 μW/mm2)												Comparison of response probability between opsins (470 nm, 5 ms pulse duration, 235 μW/mm2)
Comparison of Fits										Kruskal-Wallis test												Kruskal-Wallis test												Kruskal-Wallis test												Kruskal-Wallis test
Null hypothesis	Slope = 0	Slope = 0	Slope = 0	Slope = 0	Slope = 0	Slope = 0	Slope = 0	Slope = 0		P value	0.1742											P value	<0.0001											P value	<0.0001											P value	<0.0001
Alternative hypothesis	Slope unconstrained	Slope unconstrained	Slope unconstrained	Slope unconstrained	Slope unconstrained	Slope unconstrained	Slope unconstrained	Slope unconstrained		Exact or approximate P value?	Approximate											Exact or approximate P value?	Approximate											Exact or approximate P value?	Approximate											Exact or approximate P value?	Approximate
P value	0.4676	<0.0001	<0.0001	0.0331	0.709	<0.0001	<0.0001	0.5339		P value summary	ns											P value summary	****											P value summary	****											P value summary	****
Conclusion (alpha = 0.05)	Do not reject null hypothesis	Reject null hypothesis	Reject null hypothesis	Reject null hypothesis	Do not reject null hypothesis	Reject null hypothesis	Reject null hypothesis	Do not reject null hypothesis		Do the medians vary signif. (P < 0.05)?	No											Do the medians vary signif. (P < 0.05)?	Yes											Do the medians vary signif. (P < 0.05)?	Yes											Do the medians vary signif. (P < 0.05)?	Yes
Preferred model	Slope = 0	Slope unconstrained	Slope unconstrained	Slope unconstrained	Slope = 0	Slope unconstrained	Slope unconstrained	Slope = 0		Number of groups	8											Number of groups	8											Number of groups	8											Number of groups	8
F (DFn, DFd)	0.5311 (1, 118)	409.8 (1, 718)	60.15 (1, 173)	4.747 (1, 63)	0.1396 (1, 258)	40.52 (1, 493)	46.52 (1, 373)	0.3877 (1, 368)		Kruskal-Wallis statistic	10.26											Kruskal-Wallis statistic	45.82											Kruskal-Wallis statistic	183											Kruskal-Wallis statistic	176.8
Slope unconstrained										Dunn's multiple comparisons test	Mean rank diff.	Significant?	Summary	Adjusted P Value	Mean rank 1	Mean rank 2	Mean rank diff.	n1	n2	Z		Dunn's multiple comparisons test	Mean rank diff.	Significant?	Summary	Adjusted P Value	Mean rank 1	Mean rank 2	Mean rank diff.	n1	n2	Z		Dunn's multiple comparisons test	Mean rank diff.	Significant?	Summary	Adjusted P Value	Mean rank 1	Mean rank 2	Mean rank diff.	n1	n2	Z		Dunn's multiple comparisons test	Mean rank diff.	Significant?	Summary
Best-fit values										CheRiff vs. CoChR	10.87	No	ns	>0.9999	263.8	252.9	10.87	24	144	0.5313		CheRiff vs. CoChR	-78.7	Yes	*	0.0322	230.9	309.6	-78.7	24	144	3.251		CheRiff vs. CoChR	-163	Yes	****	<0.0001	214.9	377.8	-163	24	144	5.742		CheRiff vs. CoChR	-189.7	Yes	****
YIntercept	-1.36	-1.084	-3.653	-2.134	-1.221	-2.194	-1.538	-1.205		CheRiff vs. ChR2	31.19	No	ns	>0.9999	263.8	232.6	31.19	24	35	1.269		CheRiff vs. ChR2	-18.89	No	ns	>0.9999	230.9	249.8	-18.89	24	35	0.6492		CheRiff vs. ChR2	32.55	No	ns	>0.9999	214.9	182.3	32.55	24	35	0.954		CheRiff vs. ChR2	-36.86	No	ns
Slope	0.0879	0.383	1.22	0.4627	-0.03438	0.6047	0.4185	0.04134		CheRiff vs. Chronos	44.25	No	ns	>0.9999	263.8	219.5	44.25	24	13	1.385		CheRiff vs. Chronos	-16.64	No	ns	>0.9999	230.9	247.6	-16.64	24	13	0.44		CheRiff vs. Chronos	39.03	No	ns	>0.9999	214.9	175.8	39.03	24	13	0.8804		CheRiff vs. Chronos	-8.22	No	ns
Goodness of Fit										CheRiff vs. ChrimsonR	3.413	No	ns	>0.9999	263.8	260.3	3.413	24	52	0.1491		CheRiff vs. ChrimsonR	11.7	No	ns	>0.9999	230.9	219.2	11.7	24	52	0.4317		CheRiff vs. ChrimsonR	19.01	No	ns	>0.9999	214.9	195.9	19.01	24	52	0.5984		CheRiff vs. ChrimsonR	6.04	No	ns
Degrees of Freedom	118	718	173	63	258	493	373	368		CheRiff vs. GtACR2	-14.75	No	ns	>0.9999	263.8	278.5	-14.75	24	99	0.6988		CheRiff vs. GtACR2	-7.603	No	ns	>0.9999	230.9	238.5	-7.603	24	99	0.3043		CheRiff vs. GtACR2	8.476	No	ns	>0.9999	214.9	206.4	8.476	24	99	0.2894		CheRiff vs. GtACR2	-21.47	No	ns
R squared	0.004481	0.3634	0.258	0.07006	0.0005408	0.07594	0.1109	0.001052		CheRiff vs. WT	4.885	No	ns	>0.9999	263.8	258.9	4.885	24	74	0.2242		CheRiff vs. WT	-11.6	No	ns	>0.9999	230.9	242.5	-11.6	24	74	0.4498		CheRiff vs. WT	3.97	No	ns	>0.9999	214.9	210.9	3.97	24	74	0.1313		CheRiff vs. WT	-0.7866	No	ns
Sum of Squares	2.056	95.15	8.13	1.267	4.219	32.19	42.59	9.107		CheRiff vs. GtACR1	5.31	No	ns	>0.9999	263.8	258.4	5.31	24	75	0.2441		CheRiff vs. GtACR1	-13.44	No	ns	>0.9999	230.9	244.4	-13.44	24	75	0.522		CheRiff vs. GtACR1	-37.47	No	ns	>0.9999	214.9	252.3	-37.47	24	75	1.241		CheRiff vs. GtACR1	-67.73	No	ns
Normality of Residuals										CoChR vs. ChR2	20.32	No	ns	>0.9999	252.9	232.6	20.32	144	35	1.163		CoChR vs. ChR2	59.81	No	ns	0.1077	309.6	249.8	59.81	144	35	2.891		CoChR vs. ChR2	195.5	Yes	****	<0.0001	377.8	182.3	195.5	144	35	8.06		CoChR vs. ChR2	152.8	Yes	****
D'Agostino-Pearson omnibus (K2)	32.44	26.69	34.99	30.65	130.9	162.1	53.9	151.2		CoChR vs. Chronos	33.38	No	ns	>0.9999	252.9	219.5	33.38	144	13	1.243		CoChR vs. Chronos	62.07	No	ns	>0.9999	309.6	247.6	62.07	144	13	1.952		CoChR vs. Chronos	202	Yes	****	<0.0001	377.8	175.8	202	144	13	5.419		CoChR vs. Chronos	181.4	Yes	****
P value	<0.0001	<0.0001	<0.0001	<0.0001	<0.0001	<0.0001	<0.0001	<0.0001		CoChR vs. ChrimsonR	-7.455	No	ns	>0.9999	252.9	260.3	-7.455	144	52	0.4967		CoChR vs. ChrimsonR	90.4	Yes	****	<0.0001	309.6	219.2	90.4	144	52	5.089		CoChR vs. ChrimsonR	182	Yes	****	<0.0001	377.8	195.9	182	144	52	8.738		CoChR vs. ChrimsonR	195.7	Yes	****
Passed normality test (alpha=0.05)?	No	No	No	No	No	No	No	No		CoChR vs. GtACR2	-25.62	No	ns	0.9638	252.9	278.5	-25.62	144	99	2.115		CoChR vs. GtACR2	71.1	Yes	****	<0.0001	309.6	238.5	71.1	144	99	4.96		CoChR vs. GtACR2	171.4	Yes	****	<0.0001	377.8	206.4	171.4	144	99	10.2		CoChR vs. GtACR2	168.2	Yes	****
P value summary	****	****	****	****	****	****	****	****		CoChR vs. WT	-5.983	No	ns	>0.9999	252.9	258.9	-5.983	144	74	0.4509		CoChR vs. WT	67.1	Yes	***	0.0005	309.6	242.5	67.1	144	74	4.273		CoChR vs. WT	166.9	Yes	****	<0.0001	377.8	210.9	166.9	144	74	9.067		CoChR vs. WT	188.9	Yes	****
Test for homoscedasticity										CoChR vs. GtACR1	-5.558	No	ns	>0.9999	252.9	258.4	-5.558	144	75	0.4207		CoChR vs. GtACR1	65.26	Yes	***	0.0008	309.6	244.4	65.26	144	75	4.174		CoChR vs. GtACR1	125.5	Yes	****	<0.0001	377.8	252.3	125.5	144	75	6.847		CoChR vs. GtACR1	121.9	Yes	****
Rs of predicted Y vs. |residual|	0.6562	0.1519	0.7332	0.8097	0.726	0.6499	0.7562	0.6317		ChR2 vs. Chronos	13.06	No	ns	>0.9999	232.6	219.5	13.06	35	13	0.4333		ChR2 vs. Chronos	2.252	No	ns	>0.9999	249.8	247.6	2.252	35	13	0.06314		ChR2 vs. Chronos	6.482	No	ns	>0.9999	182.3	175.8	6.482	35	13	0.155		ChR2 vs. Chronos	28.64	No	ns
P value (one tailed)	<0.0001	<0.0001	<0.0001	<0.0001	<0.0001	<0.0001	<0.0001	<0.0001		ChR2 vs. ChrimsonR	-27.78	No	ns	>0.9999	232.6	260.3	-27.78	35	52	1.37		ChR2 vs. ChrimsonR	30.59	No	ns	>0.9999	249.8	219.2	30.59	35	52	1.274		ChR2 vs. ChrimsonR	-13.54	No	ns	>0.9999	182.3	195.9	-13.54	35	52	0.481		ChR2 vs. ChrimsonR	42.9	No	ns
Passed (P > 0.05)?	No	No	No	No	No	No	No	No		ChR2 vs. GtACR2	-45.94	No	ns	0.3302	232.6	278.5	-45.94	35	99	2.518		ChR2 vs. GtACR2	11.29	No	ns	>0.9999	249.8	238.5	11.29	35	99	0.5228		ChR2 vs. GtACR2	-24.07	No	ns	>0.9999	182.3	206.4	-24.07	35	99	0.9509		ChR2 vs. GtACR2	15.39	No	ns
										ChR2 vs. WT	-26.31	No	ns	>0.9999	232.6	258.9	-26.31	35	74	1.382		ChR2 vs. WT	7.288	No	ns	>0.9999	249.8	242.5	7.288	35	74	0.3235		ChR2 vs. WT	-28.58	No	ns	>0.9999	182.3	210.9	-28.58	35	74	1.082		ChR2 vs. WT	36.07	No	ns
Slope = 0										ChR2 vs. GtACR1	-25.88	No	ns	>0.9999	232.6	258.4	-25.88	35	75	1.363		ChR2 vs. GtACR1	5.449	No	ns	>0.9999	249.8	244.4	5.449	35	75	0.2424		ChR2 vs. GtACR1	-70.02	No	ns	0.2206	182.3	252.3	-70.02	35	75	2.657		ChR2 vs. GtACR1	-30.87	No	ns
Best-fit values										Chronos vs. ChrimsonR	-40.84	No	ns	>0.9999	219.5	260.3	-40.84	13	52	1.42		Chronos vs. ChrimsonR	28.34	No	ns	>0.9999	247.6	219.2	28.34	13	52	0.8322		Chronos vs. ChrimsonR	-20.02	No	ns	>0.9999	175.8	195.9	-20.02	13	52	0.5015		Chronos vs. ChrimsonR	14.26	No	ns
YIntercept	-1.195	-0.3195	-0.8525	-1.179	-1.283	-0.8884	-0.6913	-1.128		Chronos vs. GtACR2	-59	No	ns	0.8706	219.5	278.5	-59	13	99	2.156		Chronos vs. GtACR2	9.037	No	ns	>0.9999	247.6	238.5	9.037	13	99	0.279		Chronos vs. GtACR2	-30.55	No	ns	>0.9999	175.8	206.4	-30.55	13	99	0.8046		Chronos vs. GtACR2	-13.25	No	ns
Slope	= 0.000	= 0.000	= 0.000	= 0.000	= 0.000	= 0.000	= 0.000	= 0.000		Chronos vs. WT	-39.36	No	ns	>0.9999	219.5	258.9	-39.36	13	74	1.411		Chronos vs. WT	5.036	No	ns	>0.9999	247.6	242.5	5.036	13	74	0.1525		Chronos vs. WT	-35.06	No	ns	>0.9999	175.8	210.9	-35.06	13	74	0.9057		Chronos vs. WT	7.433	No	ns
Goodness of Fit										Chronos vs. GtACR1	-38.94	No	ns	>0.9999	219.5	258.4	-38.94	13	75	1.397		Chronos vs. GtACR1	3.197	No	ns	>0.9999	247.6	244.4	3.197	13	75	0.09691		Chronos vs. GtACR1	-76.5	No	ns	>0.9999	175.8	252.3	-76.5	13	75	1.978		Chronos vs. GtACR1	-59.51	No	ns
Degrees of Freedom	119	719	174	64	259	494	374	369		ChrimsonR vs. GtACR2	-18.16	No	ns	>0.9999	260.3	278.5	-18.16	52	99	1.143		ChrimsonR vs. GtACR2	-19.3	No	ns	>0.9999	219.2	238.5	-19.3	52	99	1.026		ChrimsonR vs. GtACR2	-10.53	No	ns	>0.9999	195.9	206.4	-10.53	52	99	0.4778		ChrimsonR vs. GtACR2	-27.51	No	ns
R squared	1.665e-15	6.661e-15	3.331e-16	0	-4.219e-15	2.887e-15	2.22e-15	-5.329e-15		ChrimsonR vs. WT	1.472	No	ns	>0.9999	260.3	258.9	1.472	52	74	0.08767		ChrimsonR vs. WT	-23.3	No	ns	>0.9999	219.2	242.5	-23.3	52	74	1.173		ChrimsonR vs. WT	-15.04	No	ns	>0.9999	195.9	210.9	-15.04	52	74	0.6457		ChrimsonR vs. WT	-6.827	No	ns
Sum of Squares	2.066	149.5	10.96	1.362	4.221	34.84	47.91	9.117		ChrimsonR vs. GtACR1	1.897	No	ns	>0.9999	260.3	258.4	1.897	52	75	0.1133		ChrimsonR vs. GtACR1	-25.14	No	ns	>0.9999	219.2	244.4	-25.14	52	75	1.269		ChrimsonR vs. GtACR1	-56.48	No	ns	0.421	195.9	252.3	-56.48	52	75	2.432		ChrimsonR vs. GtACR1	-73.77	No	ns
Normality of Residuals										GtACR2 vs. WT	19.64	No	ns	>0.9999	278.5	258.9	19.64	99	74	1.377		GtACR2 vs. WT	-4	No	ns	>0.9999	238.5	242.5	-4	99	74	0.2371		GtACR2 vs. WT	-4.506	No	ns	>0.9999	206.4	210.9	-4.506	99	74	0.2278		GtACR2 vs. WT	20.69	No	ns
D'Agostino-Pearson omnibus (K2)	32.75	3228	72.83	38.26	131.2	225.6	85.54	151.2		GtACR2 vs. GtACR1	20.06	No	ns	>0.9999	278.5	258.4	20.06	99	75	1.413		GtACR2 vs. GtACR1	-5.84	No	ns	>0.9999	238.5	244.4	-5.84	99	75	0.3474		GtACR2 vs. GtACR1	-45.95	No	ns	0.552	206.4	252.3	-45.95	99	75	2.332		GtACR2 vs. GtACR1	-46.26	No	ns
P value	<0.0001	<0.0001	<0.0001	<0.0001	<0.0001	<0.0001	<0.0001	<0.0001		WT vs. GtACR1	0.4249	No	ns	>0.9999	258.9	258.4	0.4249	74	75	0.02795		WT vs. GtACR1	-1.839	No	ns	>0.9999	242.5	244.4	-1.839	74	75	0.1022		WT vs. GtACR1	-41.44	No	ns	>0.9999	210.9	252.3	-41.44	74	75	1.965		WT vs. GtACR1	-66.94	No	ns
Passed normality test (alpha=0.05)?	No	No	No	No	No	No	No	No
P value summary	****	****	****	****	****	****	****	****
Irradiance-dependent modulation of reponse probability - linear regression on log-log transformed data (470 nm, 40 ms pulse duration)										Comparison of response probability between opsins (470 nm, 40 ms pulse duration, 5 μW/mm2)												Comparison of response probability between opsins (470 nm, 40 ms pulse duration, 25 μW/mm2)												Comparison of response probability between opsins (470 nm, 40 ms pulse duration, 112 μW/mm2)												Comparison of response probability between opsins (470 nm, 40 ms pulse duration, 235 μW/mm2)
Comparison of Fits										Kruskal-Wallis test												Kruskal-Wallis test												Kruskal-Wallis test												Kruskal-Wallis test
Null hypothesis	Slope = 0	Slope = 0	Slope = 0	Slope = 0	Slope = 0	Slope = 0	Slope = 0	Slope = 0		P value	<0.0001											P value	<0.0001											P value	<0.0001											P value	<0.0001
Alternative hypothesis	Slope unconstrained	Slope unconstrained	Slope unconstrained	Slope unconstrained	Slope unconstrained	Slope unconstrained	Slope unconstrained	Slope unconstrained		Exact or approximate P value?	Approximate											Exact or approximate P value?	Approximate											Exact or approximate P value?	Approximate											Exact or approximate P value?	Approximate
P value	<0.0001	<0.0001	<0.0001	<0.0001	<0.0001	<0.0001	<0.0001	0.5036		P value summary	****											P value summary	****											P value summary	****											P value summary	****
Conclusion (alpha = 0.05)	Reject null hypothesis	Reject null hypothesis	Reject null hypothesis	Reject null hypothesis	Reject null hypothesis	Reject null hypothesis	Reject null hypothesis	Do not reject null hypothesis		Do the medians vary signif. (P < 0.05)?	Yes											Do the medians vary signif. (P < 0.05)?	Yes											Do the medians vary signif. (P < 0.05)?	Yes											Do the medians vary signif. (P < 0.05)?	Yes
Preferred model	Slope unconstrained	Slope unconstrained	Slope unconstrained	Slope unconstrained	Slope unconstrained	Slope unconstrained	Slope unconstrained	Slope = 0		Number of groups	8											Number of groups	8											Number of groups	8											Number of groups	8
F (DFn, DFd)	70.17 (1, 98)	276.4 (1, 718)	246.4 (1, 173)	174.0 (1, 63)	127.7 (1, 258)	79.37 (1, 493)	40.12 (1, 373)	0.4483 (1, 368)		Kruskal-Wallis statistic	37.52											Kruskal-Wallis statistic	208											Kruskal-Wallis statistic	199											Kruskal-Wallis statistic	182.8
Slope unconstrained										Dunn's multiple comparisons test	Mean rank diff.	Significant?	Summary	Adjusted P Value	Mean rank 1	Mean rank 2	Mean rank diff.	n1	n2	Z		Dunn's multiple comparisons test	Mean rank diff.	Significant?	Summary	Adjusted P Value	Mean rank 1	Mean rank 2	Mean rank diff.	n1	n2	Z		Dunn's multiple comparisons test	Mean rank diff.	Significant?	Summary	Adjusted P Value	Mean rank 1	Mean rank 2	Mean rank diff.	n1	n2	Z		Dunn's multiple comparisons test	Mean rank diff.	Significant?	Summary
Best-fit values										CheRiff vs. CoChR	-67.94	No	ns	0.0717	228.1	296	-67.94	20	144	3.016		CheRiff vs. CoChR	-183.2	Yes	****	<0.0001	193	376.2	-183.2	20	144	6.286		CheRiff vs. CoChR	-196.8	Yes	****	<0.0001	170.9	367.7	-196.8	20	144	6.196		CheRiff vs. CoChR	-177.4	Yes	****
YIntercept	-3.951	-0.5713	-1.551	-3.793	-3.436	-1.464	-1.001	-1.434		CheRiff vs. ChR2	6.164	No	ns	>0.9999	228.1	221.9	6.164	20	35	0.233		CheRiff vs. ChR2	-0.6286	No	ns	>0.9999	193	193.6	-0.6286	20	35	0.01836		CheRiff vs. ChR2	-126.7	Yes	*	0.0191	170.9	297.6	-126.7	20	35	3.396		CheRiff vs. ChR2	-148.3	Yes	**
Slope	1.373	0.2095	0.58	1.396	1.198	0.4226	0.2693	0.05858		CheRiff vs. Chronos	-4.642	No	ns	>0.9999	228.1	232.7	-4.642	20	13	0.138		CheRiff vs. Chronos	6.115	No	ns	>0.9999	193	186.9	6.115	20	13	0.1405		CheRiff vs. Chronos	-0.1769	No	ns	>0.9999	170.9	171.1	-0.1769	20	13	0.003731		CheRiff vs. Chronos	-46.49	No	ns
Goodness of Fit										CheRiff vs. ChrimsonR	-13.24	No	ns	>0.9999	228.1	241.3	-13.24	20	52	0.533		CheRiff vs. ChrimsonR	6.115	No	ns	>0.9999	193	186.9	6.115	20	52	0.1903		CheRiff vs. ChrimsonR	16.61	No	ns	>0.9999	170.9	154.3	16.61	20	52	0.4744		CheRiff vs. ChrimsonR	-18.26	No	ns
Degrees of Freedom	98	718	173	63	258	493	373	368		CheRiff vs. GtACR2	-15.34	No	ns	>0.9999	228.1	243.4	-15.34	20	99	0.6628		CheRiff vs. GtACR2	-10.66	No	ns	>0.9999	193	203.7	-10.66	20	99	0.356		CheRiff vs. GtACR2	-63.88	No	ns	>0.9999	170.9	234.8	-63.88	20	99	1.958		CheRiff vs. GtACR2	-38.37	No	ns
R squared	0.4173	0.278	0.5875	0.7341	0.331	0.1387	0.09711	0.001217		CheRiff vs. WT	-18.02	No	ns	>0.9999	228.1	246.1	-18.02	20	74	0.7576		CheRiff vs. WT	-7.885	No	ns	>0.9999	193	200.9	-7.885	20	74	0.2561		CheRiff vs. WT	21.31	No	ns	>0.9999	170.9	149.6	21.31	20	74	0.6354		CheRiff vs. WT	56.16	No	ns
Sum of Squares	4.206	95.92	15.1	2.056	20.51	67.41	68.82	5.193		CheRiff vs. GtACR1	-18.64	No	ns	>0.9999	228.1	246.7	-18.64	20	75	0.7845		CheRiff vs. GtACR1	-64.83	No	ns	0.9783	193	257.8	-64.83	20	75	2.109		CheRiff vs. GtACR1	-95.58	No	ns	0.121	170.9	266.5	-95.58	20	75	2.854		CheRiff vs. GtACR1	-55.12	No	ns
Normality of Residuals										CoChR vs. ChR2	74.1	Yes	***	0.0009	296	221.9	74.1	144	35	4.165		CoChR vs. ChR2	182.6	Yes	****	<0.0001	376.2	193.6	182.6	144	35	7.933		CoChR vs. ChR2	70.1	No	ns	0.1454	367.7	297.6	70.1	144	35	2.795		CoChR vs. ChR2	29.13	No	ns
D'Agostino-Pearson omnibus (K2)	29.35	48.63	0.2989	11.61	17.27	58.13	294.6	166.7		CoChR vs. Chronos	63.3	No	ns	0.5767	296	232.7	63.3	144	13	2.315		CoChR vs. Chronos	189.4	Yes	****	<0.0001	376.2	186.9	189.4	144	13	5.353		CoChR vs. Chronos	196.6	Yes	****	<0.0001	367.7	171.1	196.6	144	13	5.101		CoChR vs. Chronos	130.9	Yes	*
P value	<0.0001	<0.0001	0.8612	0.003	0.0002	<0.0001	<0.0001	<0.0001		CoChR vs. ChrimsonR	54.7	Yes	**	0.0096	296	241.3	54.7	144	52	3.582		CoChR vs. ChrimsonR	189.4	Yes	****	<0.0001	376.2	186.9	189.4	144	52	9.581		CoChR vs. ChrimsonR	213.4	Yes	****	<0.0001	367.7	154.3	213.4	144	52	9.911		CoChR vs. ChrimsonR	159.2	Yes	****
Passed normality test (alpha=0.05)?	No	No	Yes	No	No	No	No	No		CoChR vs. GtACR2	52.6	Yes	***	0.0006	296	243.4	52.6	144	99	4.268		CoChR vs. GtACR2	172.6	Yes	****	<0.0001	376.2	203.7	172.6	144	99	10.82		CoChR vs. GtACR2	132.9	Yes	****	<0.0001	367.7	234.8	132.9	144	99	7.65		CoChR vs. GtACR2	139	Yes	****
P value summary	****	****	ns	**	***	****	****	****		CoChR vs. WT	49.92	Yes	**	0.0061	296	246.1	49.92	144	74	3.697		CoChR vs. WT	175.4	Yes	****	<0.0001	376.2	200.9	175.4	144	74	10.04		CoChR vs. WT	218.1	Yes	****	<0.0001	367.7	149.6	218.1	144	74	11.46		CoChR vs. WT	233.6	Yes	****
Test for homoscedasticity										CoChR vs. GtACR1	49.3	Yes	**	0.0069	296	246.7	49.3	144	75	3.668		CoChR vs. GtACR1	118.4	Yes	****	<0.0001	376.2	257.8	118.4	144	75	6.807		CoChR vs. GtACR1	101.2	Yes	****	<0.0001	367.7	266.5	101.2	144	75	5.341		CoChR vs. GtACR1	122.3	Yes	****
Rs of predicted Y vs. |residual|	0.8147	-0.571	0.08481	0.4376	0.8423	0.6765	0.5518	0.733		ChR2 vs. Chronos	-10.81	No	ns	>0.9999	221.9	232.7	-10.81	35	13	0.3524		ChR2 vs. Chronos	6.744	No	ns	>0.9999	193.6	186.9	6.744	35	13	0.17		ChR2 vs. Chronos	126.5	No	ns	0.0959	297.6	171.1	126.5	35	13	2.927		ChR2 vs. Chronos	101.8	No	ns
P value (one tailed)	<0.0001	<0.0001	0.1322	0.0001	<0.0001	<0.0001	<0.0001	<0.0001		ChR2 vs. ChrimsonR	-19.4	No	ns	>0.9999	221.9	241.3	-19.4	35	52	0.9401		ChR2 vs. ChrimsonR	6.744	No	ns	>0.9999	193.6	186.9	6.744	35	52	0.2525		ChR2 vs. ChrimsonR	143.3	Yes	****	<0.0001	297.6	154.3	143.3	35	52	4.925		ChR2 vs. ChrimsonR	130	Yes	***
Passed (P > 0.05)?	No	No	Yes	No	No	No	No	No		ChR2 vs. GtACR2	-21.5	No	ns	>0.9999	221.9	243.4	-21.5	35	99	1.158		ChR2 vs. GtACR2	-10.03	No	ns	>0.9999	193.6	203.7	-10.03	35	99	0.4177		ChR2 vs. GtACR2	62.82	No	ns	0.4587	297.6	234.8	62.82	35	99	2.4		ChR2 vs. GtACR2	109.9	Yes	**
										ChR2 vs. WT	-24.19	No	ns	>0.9999	221.9	246.1	-24.19	35	74	1.249		ChR2 vs. WT	-7.257	No	ns	>0.9999	193.6	200.9	-7.257	35	74	0.2896		ChR2 vs. WT	148	Yes	****	<0.0001	297.6	149.6	148	35	74	5.421		ChR2 vs. WT	204.5	Yes	****
Slope = 0										ChR2 vs. GtACR1	-24.8	No	ns	>0.9999	221.9	246.7	-24.8	35	75	1.283		ChR2 vs. GtACR1	-64.2	No	ns	0.2867	193.6	257.8	-64.2	35	75	2.568		ChR2 vs. GtACR1	31.12	No	ns	>0.9999	297.6	266.5	31.12	35	75	1.142		ChR2 vs. GtACR1	93.17	Yes	*
Best-fit values										Chronos vs. ChrimsonR	-8.596	No	ns	>0.9999	232.7	241.3	-8.596	13	52	0.2937		Chronos vs. ChrimsonR	0	No	ns	>0.9999	186.9	186.9	0	13	52	0		Chronos vs. ChrimsonR	16.79	No	ns	>0.9999	171.1	154.3	16.79	13	52	0.4068		Chronos vs. ChrimsonR	28.23	No	ns
YIntercept	-0.7959	-0.1668	-0.3508	-0.592	-0.7254	-0.6106	-0.4748	-1.324		Chronos vs. GtACR2	-10.7	No	ns	>0.9999	232.7	243.4	-10.7	13	99	0.3841		Chronos vs. GtACR2	-16.78	No	ns	>0.9999	186.9	203.7	-16.78	13	99	0.4656		Chronos vs. GtACR2	-63.7	No	ns	>0.9999	171.1	234.8	-63.7	13	99	1.622		Chronos vs. GtACR2	8.114	No	ns
Slope	= 0.000	= 0.000	= 0.000	= 0.000	= 0.000	= 0.000	= 0.000	= 0.000		Chronos vs. WT	-13.38	No	ns	>0.9999	232.7	246.1	-13.38	13	74	0.4714		Chronos vs. WT	-14	No	ns	>0.9999	186.9	200.9	-14	13	74	0.3811		Chronos vs. WT	21.49	No	ns	>0.9999	171.1	149.6	21.49	13	74	0.5369		Chronos vs. WT	102.6	No	ns
Goodness of Fit										Chronos vs. GtACR1	-13.99	No	ns	>0.9999	232.7	246.7	-13.99	13	75	0.4934		Chronos vs. GtACR1	-70.95	No	ns	>0.9999	186.9	257.8	-70.95	13	75	1.933		Chronos vs. GtACR1	-95.4	No	ns	0.4769	171.1	266.5	-95.4	13	75	2.386		Chronos vs. GtACR1	-8.635	No	ns
Degrees of Freedom	99	719	174	64	259	494	374	369		ChrimsonR vs. GtACR2	-2.1	No	ns	>0.9999	241.3	243.4	-2.1	52	99	0.1299		ChrimsonR vs. GtACR2	-16.78	No	ns	>0.9999	186.9	203.7	-16.78	52	99	0.802		ChrimsonR vs. GtACR2	-80.49	Yes	*	0.0116	154.3	234.8	-80.49	52	99	3.531		ChrimsonR vs. GtACR2	-20.12	No	ns
R squared	-4.441e-16	1.332e-15	-6.661e-16	0	-1.11e-15	1.221e-15	4.885e-15	5.329e-15		ChrimsonR vs. WT	-4.786	No	ns	>0.9999	241.3	246.1	-4.786	52	74	0.2802		ChrimsonR vs. WT	-14	No	ns	>0.9999	186.9	200.9	-14	52	74	0.6334		ChrimsonR vs. WT	4.701	No	ns	>0.9999	154.3	149.6	4.701	52	74	0.1952		ChrimsonR vs. WT	74.42	No	ns
Sum of Squares	7.218	132.9	36.6	7.732	30.66	78.26	76.22	5.2		ChrimsonR vs. GtACR1	-5.398	No	ns	>0.9999	241.3	246.7	-5.398	52	75	0.3169		ChrimsonR vs. GtACR1	-70.95	Yes	*	0.0361	186.9	257.8	-70.95	52	75	3.219		ChrimsonR vs. GtACR1	-112.2	Yes	****	<0.0001	154.3	266.5	-112.2	52	75	4.671		ChrimsonR vs. GtACR1	-36.87	No	ns
Normality of Residuals										GtACR2 vs. WT	-2.685	No	ns	>0.9999	243.4	246.1	-2.685	99	74	0.1851		GtACR2 vs. WT	2.776	No	ns	>0.9999	203.7	200.9	2.776	99	74	0.1479		GtACR2 vs. WT	85.19	Yes	***	0.0009	234.8	149.6	85.19	99	74	4.165		GtACR2 vs. WT	94.53	Yes	***
D'Agostino-Pearson omnibus (K2)	46.77	632.8	1233	12.31	72.29	83.44	2484	167.5		GtACR2 vs. GtACR1	-3.298	No	ns	>0.9999	243.4	246.7	-3.298	99	75	0.2282		GtACR2 vs. GtACR1	-54.17	No	ns	0.1055	203.7	257.8	-54.17	99	75	2.897		GtACR2 vs. GtACR1	-31.7	No	ns	>0.9999	234.8	266.5	-31.7	99	75	1.556		GtACR2 vs. GtACR1	-16.75	No	ns
P value	<0.0001	<0.0001	<0.0001	0.0021	<0.0001	<0.0001	<0.0001	<0.0001		WT vs. GtACR1	-0.6123	No	ns	>0.9999	246.1	246.7	-0.6123	74	75	0.03959		WT vs. GtACR1	-56.95	No	ns	0.1242	200.9	257.8	-56.95	74	75	2.845		WT vs. GtACR1	-116.9	Yes	****	<0.0001	149.6	266.5	-116.9	74	75	5.36		WT vs. GtACR1	-111.3	Yes	****
Passed normality test (alpha=0.05)?	No	No	No	No	No	No	No	No
P value summary	****	****	****	**	****	****	****	****
Irradiance-dependent modulation of reponse probability - linear regression on log-log transformed data (590 nm, 40 ms pulse duration)										Comparison of response probability between opsins (590 nm, 40 ms pulse duration, 4.5 μW/mm2)												Comparison of response probability between opsins (590 nm, 40 ms pulse duration, 19 μW/mm2)												Comparison of response probability between opsins (590 nm, 40 ms pulse duration, 107 μW/mm2)												Comparison of response probability between opsins (590 nm, 40 ms pulse duration, 246 μW/mm2)
Comparison of Fits										Kruskal-Wallis test												Kruskal-Wallis test												Kruskal-Wallis test												Kruskal-Wallis test
Null hypothesis	Slope = 0	Slope = 0	Slope = 0	Slope = 0	Slope = 0	Slope = 0	Slope = 0	Slope = 0		P value	0.4946											P value	0.6616											P value	<0.0001											P value	<0.0001
Alternative hypothesis	Slope unconstrained	Slope unconstrained	Slope unconstrained	Slope unconstrained	Slope unconstrained	Slope unconstrained	Slope unconstrained	Slope unconstrained		Exact or approximate P value?	Approximate											Exact or approximate P value?	Approximate											Exact or approximate P value?	Approximate											Exact or approximate P value?	Approximate
P value	0.1239	<0.0001	0.0114	0.2701	<0.0001	0.4528	<0.0001	0.7851		P value summary	ns											P value summary	ns											P value summary	****											P value summary	****
Conclusion (alpha = 0.05)	Do not reject null hypothesis	Reject null hypothesis	Reject null hypothesis	Do not reject null hypothesis	Reject null hypothesis	Do not reject null hypothesis	Reject null hypothesis	Do not reject null hypothesis		Do the medians vary signif. (P < 0.05)?	No											Do the medians vary signif. (P < 0.05)?	No											Do the medians vary signif. (P < 0.05)?	Yes											Do the medians vary signif. (P < 0.05)?	Yes
Preferred model	Slope = 0	Slope unconstrained	Slope unconstrained	Slope = 0	Slope unconstrained	Slope = 0	Slope unconstrained	Slope = 0		Number of groups	8											Number of groups	8											Number of groups	8											Number of groups	8
F (DFn, DFd)	2.397 (1, 138)	18.97 (1, 718)	6.537 (1, 173)	1.238 (1, 63)	148.4 (1, 258)	0.5646 (1, 493)	44.97 (1, 373)	0.07446 (1, 368)		Kruskal-Wallis statistic	6.394											Kruskal-Wallis statistic	4.986											Kruskal-Wallis statistic	44.52											Kruskal-Wallis statistic	95.45
Slope unconstrained										Dunn's multiple comparisons test	Mean rank diff.	Significant?	Summary	Adjusted P Value	Mean rank 1	Mean rank 2	Mean rank diff.	n1	n2	Z		Dunn's multiple comparisons test	Mean rank diff.	Significant?	Summary	Adjusted P Value	Mean rank 1	Mean rank 2	Mean rank diff.	n1	n2	Z		Dunn's multiple comparisons test	Mean rank diff.	Significant?	Summary	Adjusted P Value	Mean rank 1	Mean rank 2	Mean rank diff.	n1	n2	Z		Dunn's multiple comparisons test	Mean rank diff.	Significant?	Summary
Best-fit values										CheRiff vs. CoChR	-6.31	No	ns	>0.9999	248.9	255.2	-6.31	28	144	0.2974		CheRiff vs. CoChR	12.33	No	ns	>0.9999	279.3	266.9	12.33	28	144	0.5861		CheRiff vs. CoChR	-1.303	No	ns	>0.9999	240.6	241.9	-1.303	28	144	0.05562		CheRiff vs. CoChR	-13.19	No	ns
YIntercept	-1.412	-1.471	-1.695	-1.406	-1.555	-1.124	-1.692	-1.127		CheRiff vs. ChR2	18.83	No	ns	>0.9999	248.9	230	18.83	28	35	0.7229		CheRiff vs. ChR2	15.94	No	ns	>0.9999	279.3	263.3	15.94	28	35	0.6169		CheRiff vs. ChR2	14.82	No	ns	>0.9999	240.6	225.8	14.82	28	35	0.5156		CheRiff vs. ChR2	19.6	No	ns
Slope	0.1715	0.2298	0.2903	0.2061	0.564	0.04056	0.4812	0.01933		CheRiff vs. Chronos	-19.84	No	ns	>0.9999	248.9	268.7	-19.84	28	13	0.5753		CheRiff vs. Chronos	49.98	No	ns	>0.9999	279.3	229.3	49.98	28	13	1.462		CheRiff vs. Chronos	-18.97	No	ns	>0.9999	240.6	259.6	-18.97	28	13	0.4985		CheRiff vs. Chronos	17.11	No	ns
Goodness of Fit										CheRiff vs. ChrimsonR	-12.34	No	ns	>0.9999	248.9	261.2	-12.34	28	52	0.5123		CheRiff vs. ChrimsonR	16.61	No	ns	>0.9999	279.3	262.6	16.61	28	52	0.6953		CheRiff vs. ChrimsonR	-103.7	Yes	**	0.0027	240.6	344.3	-103.7	28	52	3.903		CheRiff vs. ChrimsonR	-178.7	Yes	****
Degrees of Freedom	138	718	173	63	258	493	373	368		CheRiff vs. GtACR2	-27.43	No	ns	>0.9999	248.9	276.3	-27.43	28	99	1.247		CheRiff vs. GtACR2	14.94	No	ns	>0.9999	279.3	264.3	14.94	28	99	0.6849		CheRiff vs. GtACR2	-16.56	No	ns	>0.9999	240.6	257.2	-16.56	28	99	0.6824		CheRiff vs. GtACR2	-1.539	No	ns
R squared	0.01707	0.02574	0.03641	0.01927	0.3652	0.001144	0.1076	0.0002023		CheRiff vs. WT	-13.78	No	ns	>0.9999	248.9	262.6	-13.78	28	74	0.6045		CheRiff vs. WT	24.8	No	ns	>0.9999	279.3	254.4	24.8	28	74	1.097		CheRiff vs. WT	3.472	No	ns	>0.9999	240.6	237.1	3.472	28	74	0.138		CheRiff vs. WT	0.3345	No	ns
Sum of Squares	3.248	23	3.623	2.11	30.73	13.41	37.31	10.19		CheRiff vs. GtACR1	-15.6	No	ns	>0.9999	248.9	264.5	-15.6	28	75	0.6858		CheRiff vs. GtACR1	34.52	No	ns	>0.9999	279.3	244.7	34.52	28	75	1.53		CheRiff vs. GtACR1	-48.69	No	ns	>0.9999	240.6	289.3	-48.69	28	75	1.939		CheRiff vs. GtACR1	-56.21	No	ns
Normality of Residuals										CoChR vs. ChR2	25.14	No	ns	>0.9999	255.2	230	25.14	144	35	1.298		CoChR vs. ChR2	3.602	No	ns	>0.9999	266.9	263.3	3.602	144	35	0.1876		CoChR vs. ChR2	16.12	No	ns	>0.9999	241.9	225.8	16.12	144	35	0.7546		CoChR vs. ChR2	32.79	No	ns
D'Agostino-Pearson omnibus (K2)	41.46	310.1	54.66	28.51	9.596	144.5	61.53	146.8		CoChR vs. Chronos	-13.53	No	ns	>0.9999	255.2	268.7	-13.53	144	13	0.4546		CoChR vs. Chronos	37.65	No	ns	>0.9999	266.9	229.3	37.65	144	13	1.276		CoChR vs. Chronos	-17.67	No	ns	>0.9999	241.9	259.6	-17.67	144	13	0.5381		CoChR vs. Chronos	30.29	No	ns
P value	<0.0001	<0.0001	<0.0001	<0.0001	0.0082	<0.0001	<0.0001	<0.0001		CoChR vs. ChrimsonR	-6.026	No	ns	>0.9999	255.2	261.2	-6.026	144	52	0.3625		CoChR vs. ChrimsonR	4.272	No	ns	>0.9999	266.9	262.6	4.272	144	52	0.2592		CoChR vs. ChrimsonR	-102.4	Yes	****	<0.0001	241.9	344.3	-102.4	144	52	5.584		CoChR vs. ChrimsonR	-165.5	Yes	****
Passed normality test (alpha=0.05)?	No	No	No	No	No	No	No	No		CoChR vs. GtACR2	-21.12	No	ns	>0.9999	255.2	276.3	-21.12	144	99	1.575		CoChR vs. GtACR2	2.604	No	ns	>0.9999	266.9	264.3	2.604	144	99	0.1957		CoChR vs. GtACR2	-15.26	No	ns	>0.9999	241.9	257.2	-15.26	144	99	1.031		CoChR vs. GtACR2	11.65	No	ns
P value summary	****	****	****	****	**	****	****	****		CoChR vs. WT	-7.468	No	ns	>0.9999	255.2	262.6	-7.468	144	74	0.5083		CoChR vs. WT	12.47	No	ns	>0.9999	266.9	254.4	12.47	144	74	0.8557		CoChR vs. WT	4.775	No	ns	>0.9999	241.9	237.1	4.775	144	74	0.2944		CoChR vs. WT	13.52	No	ns
Test for homoscedasticity										CoChR vs. GtACR1	-9.293	No	ns	>0.9999	255.2	264.5	-9.293	144	75	0.6353		CoChR vs. GtACR1	22.18	No	ns	>0.9999	266.9	244.7	22.18	144	75	1.529		CoChR vs. GtACR1	-47.39	No	ns	0.0933	241.9	289.3	-47.39	144	75	2.935		CoChR vs. GtACR1	-43.02	No	ns
Rs of predicted Y vs. |residual|	0.6355	0.6393	0.714	0.6268	0.4942	0.5484	0.6907	0.6163		ChR2 vs. Chronos	-38.66	No	ns	>0.9999	230	268.7	-38.66	35	13	1.159		ChR2 vs. Chronos	34.05	No	ns	>0.9999	263.3	229.3	34.05	35	13	1.029		ChR2 vs. Chronos	-33.79	No	ns	>0.9999	225.8	259.6	-33.79	35	13	0.9176		ChR2 vs. Chronos	-2.498	No	ns
P value (one tailed)	<0.0001	<0.0001	<0.0001	<0.0001	<0.0001	<0.0001	<0.0001	<0.0001		ChR2 vs. ChrimsonR	-31.16	No	ns	>0.9999	230	261.2	-31.16	35	52	1.387		ChR2 vs. ChrimsonR	0.6701	No	ns	>0.9999	263.3	262.6	0.6701	35	52	0.03008		ChR2 vs. ChrimsonR	-118.6	Yes	****	<0.0001	225.8	344.3	-118.6	35	52	4.783		ChR2 vs. ChrimsonR	-198.3	Yes	****
Passed (P > 0.05)?	No	No	No	No	No	No	No	No		ChR2 vs. GtACR2	-46.26	No	ns	0.6169	230	276.3	-46.26	35	99	2.29		ChR2 vs. GtACR2	-0.9988	No	ns	>0.9999	263.3	264.3	-0.9988	35	99	0.04985		ChR2 vs. GtACR2	-31.38	No	ns	>0.9999	225.8	257.2	-31.38	35	99	1.407		ChR2 vs. GtACR2	-21.14	No	ns
										ChR2 vs. WT	-32.61	No	ns	>0.9999	230	262.6	-32.61	35	74	1.547		ChR2 vs. WT	8.868	No	ns	>0.9999	263.3	254.4	8.868	35	74	0.4243		ChR2 vs. WT	-11.35	No	ns	>0.9999	225.8	237.1	-11.35	35	74	0.488		ChR2 vs. WT	-19.27	No	ns
Slope = 0										ChR2 vs. GtACR1	-34.43	No	ns	>0.9999	230	264.5	-34.43	35	75	1.637		ChR2 vs. GtACR1	18.58	No	ns	>0.9999	263.3	244.7	18.58	35	75	0.8909		ChR2 vs. GtACR1	-63.51	No	ns	0.1738	225.8	289.3	-63.51	35	75	2.737		ChR2 vs. GtACR1	-75.82	No	ns
Best-fit values										Chronos vs. ChrimsonR	7.5	No	ns	>0.9999	268.7	261.2	7.5	13	52	0.2354		Chronos vs. ChrimsonR	-33.38	No	ns	>0.9999	229.3	262.6	-33.38	13	52	1.056		Chronos vs. ChrimsonR	-84.77	No	ns	0.4453	259.6	344.3	-84.77	13	52	2.411		Chronos vs. ChrimsonR	-195.8	Yes	****
YIntercept	-1.092	-1.033	-1.133	-1.014	-0.4123	-1.051	-0.7269	-1.093		Chronos vs. GtACR2	-7.596	No	ns	>0.9999	268.7	276.3	-7.596	13	99	0.2506		Chronos vs. GtACR2	-35.04	No	ns	>0.9999	229.3	264.3	-35.04	13	99	1.166		Chronos vs. GtACR2	2.41	No	ns	>0.9999	259.6	257.2	2.41	13	99	0.07206		Chronos vs. GtACR2	-18.64	No	ns
Slope	= 0.000	= 0.000	= 0.000	= 0.000	= 0.000	= 0.000	= 0.000	= 0.000		Chronos vs. WT	6.057	No	ns	>0.9999	268.7	262.6	6.057	13	74	0.1961		Chronos vs. WT	-25.18	No	ns	>0.9999	229.3	254.4	-25.18	13	74	0.8217		Chronos vs. WT	22.44	No	ns	>0.9999	259.6	237.1	22.44	13	74	0.6582		Chronos vs. WT	-16.77	No	ns
Goodness of Fit										Chronos vs. GtACR1	4.232	No	ns	>0.9999	268.7	264.5	4.232	13	75	0.1371		Chronos vs. GtACR1	-15.46	No	ns	>0.9999	229.3	244.7	-15.46	13	75	0.5052		Chronos vs. GtACR1	-29.72	No	ns	>0.9999	259.6	289.3	-29.72	13	75	0.8726		Chronos vs. GtACR1	-73.32	No	ns
Degrees of Freedom	139	719	174	64	259	494	374	369		ChrimsonR vs. GtACR2	-15.1	No	ns	>0.9999	261.2	276.3	-15.1	52	99	0.858		ChrimsonR vs. GtACR2	-1.669	No	ns	>0.9999	262.6	264.3	-1.669	52	99	0.09564		ChrimsonR vs. GtACR2	87.18	Yes	***	0.0002	344.3	257.2	87.18	52	99	4.49		ChrimsonR vs. GtACR2	177.1	Yes	****
R squared	1.998e-15	4.219e-15	-1.776e-15	1.221e-15	-4.219e-15	5.662e-15	-1.776e-15	5.218e-15		ChrimsonR vs. WT	-1.443	No	ns	>0.9999	261.2	262.6	-1.443	52	74	0.07762		ChrimsonR vs. WT	8.198	No	ns	>0.9999	262.6	254.4	8.198	52	74	0.4447		ChrimsonR vs. WT	107.2	Yes	****	<0.0001	344.3	237.1	107.2	52	74	5.226		ChrimsonR vs. WT	179	Yes	****
Sum of Squares	3.305	23.6	3.76	2.152	48.41	13.42	41.81	10.19		ChrimsonR vs. GtACR1	-3.268	No	ns	>0.9999	261.2	264.5	-3.268	52	75	0.1763		ChrimsonR vs. GtACR1	17.91	No	ns	>0.9999	262.6	244.7	17.91	52	75	0.9742		ChrimsonR vs. GtACR1	55.05	No	ns	0.1998	344.3	289.3	55.05	52	75	2.69		ChrimsonR vs. GtACR1	122.5	Yes	****
Normality of Residuals										GtACR2 vs. WT	13.65	No	ns	>0.9999	276.3	262.6	13.65	99	74	0.8648		GtACR2 vs. WT	9.867	No	ns	>0.9999	264.3	254.4	9.867	99	74	0.6302		GtACR2 vs. WT	20.03	No	ns	>0.9999	257.2	237.1	20.03	99	74	1.15		GtACR2 vs. WT	1.874	No	ns
D'Agostino-Pearson omnibus (K2)	45.49	326.9	61.47	28.92	3104	144.2	99.18	146.2		GtACR2 vs. GtACR1	11.83	No	ns	>0.9999	276.3	264.5	11.83	99	75	0.7521		GtACR2 vs. GtACR1	19.58	No	ns	>0.9999	264.3	244.7	19.58	99	75	1.255		GtACR2 vs. GtACR1	-32.13	No	ns	>0.9999	257.2	289.3	-32.13	99	75	1.851		GtACR2 vs. GtACR1	-54.67	No	ns
P value	<0.0001	<0.0001	<0.0001	<0.0001	<0.0001	<0.0001	<0.0001	<0.0001		WT vs. GtACR1	-1.825	No	ns	>0.9999	262.6	264.5	-1.825	74	75	0.1084		WT vs. GtACR1	9.713	No	ns	>0.9999	254.4	244.7	9.713	74	75	0.5818		WT vs. GtACR1	-52.16	No	ns	0.1396	237.1	289.3	-52.16	74	75	2.808		WT vs. GtACR1	-56.55	No	ns
Passed normality test (alpha=0.05)?	No	No	No	No	No	No	No	No
P value summary	****	****	****	****	****	****	****	****
[truncated: 20 more columns]

## Sheet: Figure 3F
Figure 3F	CheRiff	CoChR	ChR2(H134R)	Chronos	ChrimsonR	WT
Irradiance-dependent modulation of reponse probability - linear regression on log-log transformed data (459 nm, 2 ms pulse duration)								Comparison of response probability between opsins (459 nm, 2 ms pulse duration, 0.04 mW/mm2)												Comparison of response probability between opsins (459 nm, 2 ms pulse duration, 0.63 mW/mm2)												Comparison of response probability between opsins (459 nm, 2 ms pulse duration, 1.31 mW/mm2)												Comparison of response probability between opsins (459 nm, 2 ms pulse duration, 1.84 mW/mm2)
Comparison of Fits								Kruskal-Wallis test												Kruskal-Wallis test												Kruskal-Wallis test												Kruskal-Wallis test
Null hypothesis	Slope = 0	Slope = 0	Slope = 0	Slope = 0	Slope = 0	Slope = 0		P value	0.4486											P value	<0.0001											P value	<0.0001											P value	<0.0001
Alternative hypothesis	Slope unconstrained	Slope unconstrained	Slope unconstrained	Slope unconstrained	Slope unconstrained	Slope unconstrained		Exact or approximate P value?	Approximate											Exact or approximate P value?	Approximate											Exact or approximate P value?	Approximate											Exact or approximate P value?	Approximate
P value	<0.0001	<0.0001	<0.0001	<0.0001	0.9707	0.6048		P value summary	ns											P value summary	****											P value summary	****											P value summary	****
Conclusion (alpha = 0.05)	Reject null hypothesis	Reject null hypothesis	Reject null hypothesis	Reject null hypothesis	Do not reject null hypothesis	Do not reject null hypothesis		Do the medians vary signif. (P < 0.05)?	No											Do the medians vary signif. (P < 0.05)?	Yes											Do the medians vary signif. (P < 0.05)?	Yes											Do the medians vary signif. (P < 0.05)?	Yes
Preferred model	Slope unconstrained	Slope unconstrained	Slope unconstrained	Slope unconstrained	Slope = 0	Slope = 0		Number of groups	6											Number of groups	6											Number of groups	6											Number of groups	6
F (DFn, DFd)	44.74 (1, 88)	272.6 (1, 88)	287.2 (1, 173)	129.4 (1, 93)	0.001353 (1, 113)	0.2687 (1, 193)		Kruskal-Wallis statistic	4.739											Kruskal-Wallis statistic	105.4											Kruskal-Wallis statistic	109.5											Kruskal-Wallis statistic	113.9
Slope unconstrained								Dunn's multiple comparisons test	Mean rank diff.	Significant?	Summary	Adjusted P Value	Mean rank 1	Mean rank 2	Mean rank diff.	n1	n2	Z		Dunn's multiple comparisons test	Mean rank diff.	Significant?	Summary	Adjusted P Value	Mean rank 1	Mean rank 2	Mean rank diff.	n1	n2	Z		Dunn's multiple comparisons test	Mean rank diff.	Significant?	Summary	Adjusted P Value	Mean rank 1	Mean rank 2	Mean rank diff.	n1	n2	Z		Dunn's multiple comparisons test	Mean rank diff.	Significant?	Summary	Adjusted P Value	Mean rank 1
Best-fit values								CheRiff vs. CoChR	-4.222	No	ns	>0.9999	77.72	81.94	-4.222	18	18	0.8531		CheRiff vs. CoChR	-80.5	Yes	****	<0.0001	61	141.5	-80.5	18	18	7.811		CheRiff vs. CoChR	-77.31	Yes	****	<0.0001	53	130.3	-77.31	18	18	6.538		CheRiff vs. CoChR	-55.78	Yes	***	0.0003	67.72
YIntercept	-1.308	-0.08074	-0.2977	-1.215	-2.842	-1.976		CheRiff vs. ChR2	-0.1206	No	ns	>0.9999	77.72	77.84	-0.1206	18	35	0.02801		CheRiff vs. ChR2	-24.17	No	ns	0.1054	61	85.17	-24.17	18	35	2.696		CheRiff vs. ChR2	-56.94	Yes	****	<0.0001	53	109.9	-56.94	18	35	5.535		CheRiff vs. ChR2	-50.46	Yes	***	0.0001	67.72
Slope	2.475	0.3345	0.7958	2.793	-0.01751	0.1851		CheRiff vs. Chronos	4.222	No	ns	>0.9999	77.72	73.5	4.222	18	19	0.8646		CheRiff vs. Chronos	0	No	ns	>0.9999	61	61	0	18	19	0		CheRiff vs. Chronos	-4.132	No	ns	>0.9999	53	57.13	-4.132	18	19	0.3541		CheRiff vs. Chronos	-8.62	No	ns	>0.9999	67.72
Goodness of Fit								CheRiff vs. ChrimsonR	4.222	No	ns	>0.9999	77.72	73.5	4.222	18	23	0.9036		CheRiff vs. ChrimsonR	-2.652	No	ns	>0.9999	61	63.65	-2.652	18	23	0.2726		CheRiff vs. ChrimsonR	0	No	ns	>0.9999	53	53	0	18	23	0		CheRiff vs. ChrimsonR	27.22	No	ns	0.4182	67.72
Degrees of Freedom	88	88	173	93	113	193		CheRiff vs. WT	2.274	No	ns	>0.9999	77.72	75.45	2.274	18	39	0.5374		CheRiff vs. WT	0	No	ns	>0.9999	61	61	0	18	39	0		CheRiff vs. WT	-2.795	No	ns	>0.9999	53	55.79	-2.795	18	39	0.2765		CheRiff vs. WT	24.97	No	ns	0.389	67.72
R squared	0.3371	0.756	0.6241	0.5818	1.198e-05	0.00139		CoChR vs. ChR2	4.102	No	ns	>0.9999	81.94	77.84	4.102	18	35	0.9524		CoChR vs. ChR2	56.33	Yes	****	<0.0001	141.5	85.17	56.33	18	35	6.282		CoChR vs. ChR2	20.36	No	ns	0.717	130.3	109.9	20.36	18	35	1.979		CoChR vs. ChR2	5.314	No	ns	>0.9999	123.5
Sum of Squares	6.371	3.346	14.52	6.92	0.02754	0.6453		CoChR vs. Chronos	8.444	No	ns	>0.9999	81.94	73.5	8.444	18	19	1.729		CoChR vs. Chronos	80.5	Yes	****	<0.0001	141.5	61	80.5	18	19	7.916		CoChR vs. Chronos	73.17	Yes	****	<0.0001	130.3	57.13	73.17	18	19	6.272		CoChR vs. Chronos	47.16	Yes	**	0.004	123.5
Normality of Residuals								CoChR vs. ChrimsonR	8.444	No	ns	>0.9999	81.94	73.5	8.444	18	23	1.807		CoChR vs. ChrimsonR	77.85	Yes	****	<0.0001	141.5	63.65	77.85	18	23	8.001		CoChR vs. ChrimsonR	77.31	Yes	****	<0.0001	130.3	53	77.31	18	23	6.925		CoChR vs. ChrimsonR	83	Yes	****	<0.0001	123.5
D'Agostino-Pearson omnibus (K2)	15.06	11.91	2.871	15.68	248.5	241.1		CoChR vs. WT	6.496	No	ns	>0.9999	81.94	75.45	6.496	18	39	1.535		CoChR vs. WT	80.5	Yes	****	<0.0001	141.5	61	80.5	18	39	9.138		CoChR vs. WT	74.51	Yes	****	<0.0001	130.3	55.79	74.51	18	39	7.372		CoChR vs. WT	80.74	Yes	****	<0.0001	123.5
P value	0.0005	0.0026	0.238	0.0004	<0.0001	<0.0001		ChR2 vs. Chronos	4.343	No	ns	>0.9999	77.84	73.5	4.343	35	19	1.026		ChR2 vs. Chronos	24.17	No	ns	0.0911	85.17	61	24.17	35	19	2.744		ChR2 vs. Chronos	52.81	Yes	****	<0.0001	109.9	57.13	52.81	35	19	5.225		ChR2 vs. Chronos	41.84	Yes	**	0.0028	118.2
Passed normality test (alpha=0.05)?	No	No	Yes	No	No	No		ChR2 vs. ChrimsonR	4.343	No	ns	>0.9999	77.84	73.5	4.343	35	23	1.09		ChR2 vs. ChrimsonR	21.52	No	ns	0.1427	85.17	63.65	21.52	35	23	2.593		ChR2 vs. ChrimsonR	56.94	Yes	****	<0.0001	109.9	53	56.94	35	23	5.98		ChR2 vs. ChrimsonR	77.69	Yes	****	<0.0001	118.2
P value summary	***	**	ns	***	****	****		ChR2 vs. WT	2.394	No	ns	>0.9999	77.84	75.45	2.394	35	39	0.6925		ChR2 vs. WT	24.17	Yes	*	0.0118	85.17	61	24.17	35	39	3.358		ChR2 vs. WT	54.15	Yes	****	<0.0001	109.9	55.79	54.15	35	39	6.556		ChR2 vs. WT	75.43	Yes	****	<0.0001	118.2
Test for homoscedasticity								Chronos vs. ChrimsonR	0	No	ns	>0.9999	73.5	73.5	0	19	23	0		Chronos vs. ChrimsonR	-2.652	No	ns	>0.9999	61	63.65	-2.652	19	23	0.2767		Chronos vs. ChrimsonR	4.132	No	ns	>0.9999	57.13	53	4.132	19	23	0.3757		Chronos vs. ChrimsonR	35.84	Yes	*	0.0494	76.34
Rs of predicted Y vs. |residual|	0.9169	-0.5431	0.1391	0.8594	0.9951	0.9521		Chronos vs. WT	-1.949	No	ns	>0.9999	73.5	75.45	-1.949	19	39	0.4691		Chronos vs. WT	0	No	ns	>0.9999	61	61	0	19	39	0		Chronos vs. WT	1.337	No	ns	>0.9999	57.13	55.79	1.337	19	39	0.1347		Chronos vs. WT	33.59	Yes	*	0.0341	76.34
P value (one tailed)	<0.0001	<0.0001	0.0332	<0.0001	<0.0001	<0.0001		ChrimsonR vs. WT	-1.949	No	ns	>0.9999	73.5	75.45	-1.949	23	39	0.4992		ChrimsonR vs. WT	2.652	No	ns	>0.9999	63.65	61	2.652	23	39	0.3263		ChrimsonR vs. WT	-2.795	No	ns	>0.9999	53	55.79	-2.795	23	39	0.2997		ChrimsonR vs. WT	-2.256	No	ns	>0.9999	40.5
Passed (P > 0.05)?	No	No	No	No	No	No
Slope = 0
Best-fit values
YIntercept	-0.7879	-0.09893	-0.243	-0.5915	-2.839	-1.989
Slope	= 0.000	= 0.000	= 0.000	= 0.000	= 0.000	= 0.000
Goodness of Fit
Degrees of Freedom	89	89	174	94	114	194
R squared	0	-2.442e-15	2.442e-15	6.661e-16	3.886e-15	-1.554e-15
Sum of Squares	9.61	13.71	38.63	16.55	0.02754	0.6462
Normality of Residuals
D'Agostino-Pearson omnibus (K2)	33.03	22.83	1211	18.49	248.5	241.5
P value	<0.0001	<0.0001	<0.0001	<0.0001	<0.0001	<0.0001
Passed normality test (alpha=0.05)?	No	No	No	No	No	No
P value summary	****	****	****	****	****	****
Irradiance-dependent modulation of reponse probability - linear regression on log-log transformed data (459 nm, 10 ms pulse duration)								Comparison of response probability between opsins (459 nm, 10 ms pulse duration, 0.04 mW/mm2)												Comparison of response probability between opsins (459 nm, 10 ms pulse duration, 0.63 mW/mm2)												Comparison of response probability between opsins (459 nm, 10 ms pulse duration, 1.31 mW/mm2)												Comparison of response probability between opsins (459 nm, 10 ms pulse duration, 1.84 mW/mm2)
Comparison of Fits								Kruskal-Wallis test												Kruskal-Wallis test												Kruskal-Wallis test												Kruskal-Wallis test
Null hypothesis	Slope = 0	Slope = 0	Slope = 0	Slope = 0	Slope = 0	Slope = 0		P value	0.5737											P value	<0.0001											P value	<0.0001											P value	<0.0001
Alternative hypothesis	Slope unconstrained	Slope unconstrained	Slope unconstrained	Slope unconstrained	Slope unconstrained	Slope unconstrained		Exact or approximate P value?	Approximate											Exact or approximate P value?	Approximate											Exact or approximate P value?	Approximate											Exact or approximate P value?	Approximate
P value	<0.0001	<0.0001	<0.0001	<0.0001	<0.0001	0.9708		P value summary	ns											P value summary	****											P value summary	****											P value summary	****
Conclusion (alpha = 0.05)	Reject null hypothesis	Reject null hypothesis	Reject null hypothesis	Reject null hypothesis	Reject null hypothesis	Do not reject null hypothesis		Do the medians vary signif. (P < 0.05)?	No											Do the medians vary signif. (P < 0.05)?	Yes											Do the medians vary signif. (P < 0.05)?	Yes											Do the medians vary signif. (P < 0.05)?	Yes
Preferred model	Slope unconstrained	Slope unconstrained	Slope unconstrained	Slope unconstrained	Slope unconstrained	Slope = 0		Number of groups	6											Number of groups	6											Number of groups	6											Number of groups	6
F (DFn, DFd)	35.15 (1, 88)	124.0 (1, 38)	99.43 (1, 43)	85.14 (1, 78)	32.96 (1, 93)	0.001349 (1, 83)		Kruskal-Wallis statistic	3.833											Kruskal-Wallis statistic	56.26											Kruskal-Wallis statistic	51.29											Kruskal-Wallis statistic	44.84
Slope unconstrained								Dunn's multiple comparisons test	Mean rank diff.	Significant?	Summary	Adjusted P Value	Mean rank 1	Mean rank 2	Mean rank diff.	n1	n2	Z		Dunn's multiple comparisons test	Mean rank diff.	Significant?	Summary	Adjusted P Value	Mean rank 1	Mean rank 2	Mean rank diff.	n1	n2	Z		Dunn's multiple comparisons test	Mean rank diff.	Significant?	Summary	Adjusted P Value	Mean rank 1	Mean rank 2	Mean rank diff.	n1	n2	Z		Dunn's multiple comparisons test	Mean rank diff.	Significant?	Summary	Adjusted P Value	Mean rank 1
Best-fit values								CheRiff vs. CoChR	2.417	No	ns	>0.9999	45.92	43.5	2.417	18	8	1.219		CheRiff vs. CoChR	-42.97	Yes	****	<0.0001	38.53	81.5	-42.97	18	8	5.943		CheRiff vs. CoChR	-29.58	Yes	*	0.0186	46.42	76	-29.58	18	8	3.229		CheRiff vs. CoChR	-25.81	No	ns	0.1277	44.69
YIntercept	-0.672	-0.07776	-0.1899	-0.6774	-1.408	-2.409		CheRiff vs. ChR2	2.417	No	ns	>0.9999	45.92	43.5	2.417	18	9	1.269		CheRiff vs. ChR2	-21.08	Yes	*	0.0361	38.53	59.61	-21.08	18	9	3.035		CheRiff vs. ChR2	-26.19	Yes	*	0.0438	46.42	72.61	-26.19	18	9	2.976		CheRiff vs. ChR2	-23.58	No	ns	0.1849	44.69
Slope	1.165	0.3389	0.5661	1.53	2.557	-0.0175		CheRiff vs. Chronos	2.417	No	ns	>0.9999	45.92	43.5	2.417	18	16	1.508		CheRiff vs. Chronos	0.2153	No	ns	>0.9999	38.53	38.31	0.2153	18	16	0.03682		CheRiff vs. Chronos	3.417	No	ns	>0.9999	46.42	43	3.417	18	16	0.4612		CheRiff vs. Chronos	-9.306	No	ns	>0.9999	44.69
Goodness of Fit								CheRiff vs. ChrimsonR	2.417	No	ns	>0.9999	45.92	43.5	2.417	18	19	1.575		CheRiff vs. ChrimsonR	2.528	No	ns	>0.9999	38.53	36	2.528	18	19	0.4516		CheRiff vs. ChrimsonR	16.57	No	ns	0.2914	46.42	29.84	16.57	18	19	2.337		CheRiff vs. ChrimsonR	11.85	No	ns	>0.9999	44.69
Degrees of Freedom	88	38	43	78	93	83		CheRiff vs. WT	2.417	No	ns	>0.9999	45.92	43.5	2.417	18	17	1.532		CheRiff vs. WT	0.3513	No	ns	>0.9999	38.53	38.18	0.3513	18	17	0.06104		CheRiff vs. WT	18.42	No	ns	0.1732	46.42	28	18.42	18	17	2.526		CheRiff vs. WT	23.69	Yes	*	0.0361	44.69
R squared	0.2855	0.7654	0.6981	0.5219	0.2617	1.626e-05		CoChR vs. ChR2	0	No	ns	>0.9999	43.5	43.5	0	8	9	0		CoChR vs. ChR2	21.89	No	ns	0.1217	81.5	59.61	21.89	8	9	2.647		CoChR vs. ChR2	3.389	No	ns	>0.9999	76	72.61	3.389	8	9	0.3235		CoChR vs. ChR2	2.222	No	ns	>0.9999	70.5
Sum of Squares	11.5	1.501	2.716	7.945	7.136	0.1098		CoChR vs. Chronos	0	No	ns	>0.9999	43.5	43.5	0	8	16	0		CoChR vs. Chronos	43.19	Yes	****	<0.0001	81.5	38.31	43.19	8	16	5.861		CoChR vs. Chronos	33	Yes	**	0.0061	76	43	33	8	16	3.535		CoChR vs. Chronos	16.5	No	ns	>0.9999	70.5
Normality of Residuals								CoChR vs. ChrimsonR	0	No	ns	>0.9999	43.5	43.5	0	8	19	0		CoChR vs. ChrimsonR	45.5	Yes	****	<0.0001	81.5	36	45.5	8	19	6.344		CoChR vs. ChrimsonR	46.16	Yes	****	<0.0001	76	29.84	46.16	8	19	5.08		CoChR vs. ChrimsonR	37.66	Yes	**	0.0016	70.5
D'Agostino-Pearson omnibus (K2)	2.93	5.905	0.2824	1.957	26.76	184.1		CoChR vs. WT	0	No	ns	>0.9999	43.5	43.5	0	8	17	0		CoChR vs. WT	43.32	Yes	****	<0.0001	81.5	38.18	43.32	8	17	5.938		CoChR vs. WT	48	Yes	****	<0.0001	76	28	48	8	17	5.193		CoChR vs. WT	49.5	Yes	****	<0.0001	70.5
P value	0.2311	0.0522	0.8683	0.376	<0.0001	<0.0001		ChR2 vs. Chronos	0	No	ns	>0.9999	43.5	43.5	0	9	16	0		ChR2 vs. Chronos	21.3	Yes	*	0.04	59.61	38.31	21.3	9	16	3.004		ChR2 vs. Chronos	29.61	Yes	*	0.0147	72.61	43	29.61	9	16	3.296		ChR2 vs. Chronos	14.28	No	ns	>0.9999	68.28
Passed normality test (alpha=0.05)?	Yes	Yes	Yes	Yes	No	No		ChR2 vs. ChrimsonR	0	No	ns	>0.9999	43.5	43.5	0	9	19	0		ChR2 vs. ChrimsonR	23.61	Yes	**	0.0091	59.61	36	23.61	9	19	3.429		ChR2 vs. ChrimsonR	42.77	Yes	****	<0.0001	72.61	29.84	42.77	9	19	4.902		ChR2 vs. ChrimsonR	35.44	Yes	**	0.0022	68.28
P value summary	ns	ns	ns	ns	****	****		ChR2 vs. WT	0	No	ns	>0.9999	43.5	43.5	0	9	17	0		ChR2 vs. WT	21.43	Yes	*	0.0337	59.61	38.18	21.43	9	17	3.056		ChR2 vs. WT	44.61	Yes	****	<0.0001	72.61	28	44.61	9	17	5.019		ChR2 vs. WT	47.28	Yes	****	<0.0001	68.28
Test for homoscedasticity								Chronos vs. ChrimsonR	0	No	ns	>0.9999	43.5	43.5	0	16	19	0		Chronos vs. ChrimsonR	2.313	No	ns	>0.9999	38.31	36	2.313	16	19	0.4005		Chronos vs. ChrimsonR	13.16	No	ns	>0.9999	43	29.84	13.16	16	19	1.799		Chronos vs. ChrimsonR	21.16	No	ns	0.1036	54
Rs of predicted Y vs. |residual|	0.6671	-0.6	-0.5394	0.7061	0.9469	0.9934		Chronos vs. WT	0	No	ns	>0.9999	43.5	43.5	0	16	17	0		Chronos vs. WT	0.136	No	ns	>0.9999	38.31	38.18	0.136	16	17	0.02295		Chronos vs. WT	15	No	ns	0.6867	43	28	15	16	17	1.997		Chronos vs. WT	33	Yes	***	0.0006	54
P value (one tailed)	<0.0001	<0.0001	<0.0001	<0.0001	<0.0001	<0.0001		ChrimsonR vs. WT	0	No	ns	>0.9999	43.5	43.5	0	19	17	0		ChrimsonR vs. WT	-2.176	No	ns	>0.9999	36	38.18	-2.176	19	17	0.3831		ChrimsonR vs. WT	1.842	No	ns	>0.9999	29.84	28	1.842	19	17	0.2559		ChrimsonR vs. WT	11.84	No	ns	>0.9999	32.84
Passed (P > 0.05)?	No	No	No	No	No	No
Slope = 0
Best-fit values
YIntercept	-0.5283	-0.09691	-0.1809	-0.4457	-0.8638	-2.407
Slope	= 0.000	= 0.000	= 0.000	= 0.000	= 0.000	= 0.000
Goodness of Fit
Degrees of Freedom	89	39	44	79	94	84
R squared	8.882e-16	0	-8.882e-16	-6.661e-16	0	0
Sum of Squares	16.1	6.4	8.998	16.62	9.665	0.1098
Normality of Residuals
D'Agostino-Pearson omnibus (K2)	24.32	13.26	27.95	169.6	48.8	184.1
P value	<0.0001	0.0013	<0.0001	<0.0001	<0.0001	<0.0001
Passed normality test (alpha=0.05)?	No	No	No	No	No	No
P value summary	****	**	****	****	****	****
Irradiance-dependent modulation of reponse probability - linear regression on log-log transformed data (617 nm, 10 ms pulse duration)								Comparison of response probability between opsins (617 nm, 10 ms pulse duration, 0.04 mW/mm2)												Comparison of response probability between opsins (617 nm, 10 ms pulse duration, 0.24 mW/mm2)												Comparison of response probability between opsins (617 nm, 10 ms pulse duration, 0.63 mW/mm2)												Comparison of response probability between opsins (617 nm, 10 ms pulse duration, 0.88 mW/mm2)
Comparison of Fits								All the values are the same, so no statistical test is needed.												All the values are the same, so no statistical test is needed.												Kruskal-Wallis test												Kruskal-Wallis test
Null hypothesis	Slope = 0	Slope = 0	Slope = 0	Slope = 0	Slope = 0	Slope = 0																										P value	<0.0001											P value	<0.0001
Alternative hypothesis	Slope unconstrained	Slope unconstrained	Slope unconstrained	Slope unconstrained	Slope unconstrained	Slope unconstrained																										Exact or approximate P value?	Approximate											Exact or approximate P value?	Approximate
P value		0.3804		0.3807	<0.0001	0.6853																										P value summary	****											P value summary	****
Conclusion (alpha = 0.05)		Do not reject null hypothesis		Do not reject null hypothesis	Reject null hypothesis	Do not reject null hypothesis																										Do the medians vary signif. (P < 0.05)?	Yes											Do the medians vary signif. (P < 0.05)?	Yes
Preferred model		Slope = 0		Slope = 0	Slope unconstrained	Slope = 0																										Number of groups	6											Number of groups	6
F (DFn, DFd)		0.7795 (1, 68)		0.7793 (1, 63)	162.3 (1, 148)	0.1652 (1, 93)																										Kruskal-Wallis statistic	34.53											Kruskal-Wallis statistic	70.98
Slope unconstrained	Not converged		Not converged																													Dunn's multiple comparisons test	Mean rank diff.	Significant?	Summary	Adjusted P Value	Mean rank 1	Mean rank 2	Mean rank diff.	n1	n2	Z		Dunn's multiple comparisons test	Mean rank diff.	Significant?	Summary	Adjusted P Value	Mean rank 1
Best-fit values																																CheRiff vs. CoChR	0	No	ns	>0.9999	43.5	43.5	0	9	14	0		CheRiff vs. CoChR	-2.893	No	ns	>0.9999	37.5
YIntercept		-1.998		-1.966	-0.09017	-2.326																										CheRiff vs. ChR2	0	No	ns	>0.9999	43.5	43.5	0	9	16	0		CheRiff vs. ChR2	0	No	ns	>0.9999	37.5
Slope		1.411		1.408	1.873	0.311																										CheRiff vs. Chronos	0	No	ns	>0.9999	43.5	43.5	0	9	13	0		CheRiff vs. Chronos	-3.115	No	ns	>0.9999	37.5
Goodness of Fit																																CheRiff vs. ChrimsonR	-23.73	Yes	**	0.0085	43.5	67.23	-23.73	9	30	3.448		CheRiff vs. ChrimsonR	-42.75	Yes	****	<0.0001	37.5
Degrees of Freedom		68		63	148	93																										CheRiff vs. WT	-2.395	No	ns	>0.9999	43.5	45.89	-2.395	9	19	0.3268		CheRiff vs. WT	0	No	ns	>0.9999	37.5
R squared		0.01133		0.01222	0.523	0.001774																										CoChR vs. ChR2	0	No	ns	>0.9999	43.5	43.5	0	14	16	0		CoChR vs. ChR2	2.893	No	ns	>0.9999	40.39
Sum of Squares		0.1083		0.1081	14.67	0.1097																										CoChR vs. Chronos	0	No	ns	>0.9999	43.5	43.5	0	14	13	0		CoChR vs. Chronos	-0.2225	No	ns	>0.9999	40.39
Normality of Residuals																																CoChR vs. ChrimsonR	-23.73	Yes	***	0.0008	43.5	67.23	-23.73	14	30	4.049		CoChR vs. ChrimsonR	-39.86	Yes	****	<0.0001	40.39
D'Agostino-Pearson omnibus (K2)		151.6		141.3	4.647	205.1																										CoChR vs. WT	-2.395	No	ns	>0.9999	43.5	45.89	-2.395	14	19	0.3754		CoChR vs. WT	2.893	No	ns	>0.9999	40.39
P value		<0.0001		<0.0001	0.0979	<0.0001																										ChR2 vs. Chronos	0	No	ns	>0.9999	43.5	43.5	0	16	13	0		ChR2 vs. Chronos	-3.115	No	ns	>0.9999	37.5
Passed normality test (alpha=0.05)?		No		No	Yes	No																										ChR2 vs. ChrimsonR	-23.73	Yes	***	0.0003	43.5	67.23	-23.73	16	30	4.233		ChR2 vs. ChrimsonR	-42.75	Yes	****	<0.0001	37.5
P value summary		****		****	ns	****																										ChR2 vs. WT	-2.395	No	ns	>0.9999	43.5	45.89	-2.395	16	19	0.3897		ChR2 vs. WT	0	No	ns	>0.9999	37.5
Test for homoscedasticity																																Chronos vs. ChrimsonR	-23.73	Yes	**	0.0012	43.5	67.23	-23.73	13	30	3.947		Chronos vs. ChrimsonR	-39.63	Yes	****	<0.0001	40.62
Rs of predicted Y vs. |residual|		0.992		0.9914	0.7043	0.9836																										Chronos vs. WT	-2.395	No	ns	>0.9999	43.5	45.89	-2.395	13	19	0.3674		Chronos vs. WT	3.115	No	ns	>0.9999	40.62
P value (one tailed)		<0.0001		<0.0001	<0.0001	<0.0001																										ChrimsonR vs. WT	21.34	Yes	***	0.0009	67.23	45.89	21.34	30	19	4.019		ChrimsonR vs. WT	42.75	Yes	****	<0.0001	80.25
Passed (P > 0.05)?		No		No	No	No
Slope = 0	Perfect fit		Perfect fit
Best-fit values
YIntercept	-162	-2.322	-162	-2.29	-0.4384	-2.455
Slope	= 0.000	= 0.000	= 0.000	= 0.000	= 0.000	= 0.000
Goodness of Fit
Degrees of Freedom	44	69	79	64	149	94
R squared	1	0	1	-6.661e-16	-1.332e-15	-4.441e-16
Sum of Squares	0	0.1095	0	0.1094	30.74	0.1099
Normality of Residuals
D'Agostino-Pearson omnibus (K2)		152.9		142.6	3554	205.3
P value		<0.0001		<0.0001	<0.0001	<0.0001
Passed normality test (alpha=0.05)?		No		No	No	No
P value summary		****		****	****	****
[truncated: 16 more columns]

## Sheet: Figure 3G-K
Figure 3G	CheRiff	CoChR	ChR2(H134R)	Chronos			Figure 3H	CheRiff	CoChR	ChR2(H134R)	Chronos			Figure 3I	CheRiff	CoChR	ChR2(H134R)	Chronos			Figure 3J	CheRiff	CoChR	ChR2(H134R)	Chronos			Figure 3K	CheRiff	CoChR	ChR2(H134R)	Chronos
Irradiance-dependent modulation of reponse latency - linear regression on log-log transformed data (459 nm, 2 ms pulse duration)							Irradiance-dependent modulation of bout duration - linear regression on log-log transformed data (459 nm, 2 ms pulse duration)							Irradiance-dependent modulation of theta-1 angle - linear regression on log-log transformed data (459 nm, 2 ms pulse duration)							Irradiance-dependent modulation of tail cycles - linear regression on log-log transformed data (459 nm, 2 ms pulse duration)							Irradiance-dependent modulation of tail beat frequency - linear regression on log-log transformed data (459 nm, 2 ms pulse duration)
Comparison of Fits							Comparison of Fits							Comparison of Fits							Comparison of Fits							Comparison of Fits
Null hypothesis	Slope = 0	Slope = 0	Slope = 0	Slope = 0			Null hypothesis	Slope = 0	Slope = 0	Slope = 0	Slope = 0			Null hypothesis	Slope = 0	Slope = 0	Slope = 0	Slope = 0			Null hypothesis	Slope = 0	Slope = 0	Slope = 0	Slope = 0			Null hypothesis	Slope = 0	Slope = 0	Slope = 0	Slope = 0
Alternative hypothesis	Slope unconstrained	Slope unconstrained	Slope unconstrained	Slope unconstrained			Alternative hypothesis	Slope unconstrained	Slope unconstrained	Slope unconstrained	Slope unconstrained			Alternative hypothesis	Slope unconstrained	Slope unconstrained	Slope unconstrained	Slope unconstrained			Alternative hypothesis	Slope unconstrained	Slope unconstrained	Slope unconstrained	Slope unconstrained			Alternative hypothesis	Slope unconstrained	Slope unconstrained	Slope unconstrained	Slope unconstrained
P value	0.3593	0.3626	<0.0001	0.3872			P value	0.5873	0.1768	0.0115	0.9143			P value	0.6256	0.8704	<0.0001	0.7467			P value	0.8007	0.0618	0.0265	0.7797			P value	0.7644	0.1875	0.1163	0.242
Conclusion (alpha = 0.05)	Do not reject null hypothesis	Do not reject null hypothesis	Reject null hypothesis	Do not reject null hypothesis			Conclusion (alpha = 0.05)	Do not reject null hypothesis	Do not reject null hypothesis	Reject null hypothesis	Do not reject null hypothesis			Conclusion (alpha = 0.05)	Do not reject null hypothesis	Do not reject null hypothesis	Reject null hypothesis	Do not reject null hypothesis			Conclusion (alpha = 0.05)	Do not reject null hypothesis	Do not reject null hypothesis	Reject null hypothesis	Do not reject null hypothesis			Conclusion (alpha = 0.05)	Do not reject null hypothesis	Do not reject null hypothesis	Do not reject null hypothesis	Do not reject null hypothesis
Preferred model	Slope = 0	Slope = 0	Slope unconstrained	Slope = 0			Preferred model	Slope = 0	Slope = 0	Slope unconstrained	Slope = 0			Preferred model	Slope = 0	Slope = 0	Slope unconstrained	Slope = 0			Preferred model	Slope = 0	Slope = 0	Slope unconstrained	Slope = 0			Preferred model	Slope = 0	Slope = 0	Slope = 0	Slope = 0
F (DFn, DFd)	0.8879 (1, 17)	0.8397 (1, 70)	65.31 (1, 105)	0.7744 (1, 25)			F (DFn, DFd)	0.3061 (1, 17)	1.862 (1, 70)	6.606 (1, 108)	0.01181 (1, 25)			F (DFn, DFd)	0.2469 (1, 17)	0.02682 (1, 70)	16.94 (1, 108)	0.1067 (1, 25)			F (DFn, DFd)	0.06573 (1, 17)	3.602 (1, 70)	5.064 (1, 108)	0.07997 (1, 25)			F (DFn, DFd)	0.09341 (1, 14)	1.777 (1, 61)	2.518 (1, 85)	1.464 (1, 18)
Slope unconstrained							Slope unconstrained							Slope unconstrained							Slope unconstrained							Slope unconstrained
Best-fit values							Best-fit values							Best-fit values							Best-fit values							Best-fit values
YIntercept	1.281	0.6952	1.077	1.098			YIntercept	1.84	2.135	2.002	2.259			YIntercept	1.752	1.445	1.288	1.436			YIntercept	0.4657	0.59	0.4781	0.7877			YIntercept	1.593	1.534	1.584	1.681
Slope	-0.8668	-0.1472	-0.9089	-0.5869			Slope	0.6401	-0.2051	0.4009	-0.1365			Slope	-0.4623	0.02785	0.6396	0.3223			Slope	0.255	-0.3041	0.3479	-0.3115			Slope	-0.09446	-0.06886	-0.1184	-0.3448
Goodness of Fit							Goodness of Fit							Goodness of Fit							Goodness of Fit							Goodness of Fit
Degrees of Freedom	17	70	105	25			Degrees of Freedom	17	70	108	25			Degrees of Freedom	17	70	108	25			Degrees of Freedom	17	70	108	25			Degrees of Freedom	14	61	85	18
R squared	0.04964	0.01185	0.3835	0.03005			R squared	0.01769	0.02591	0.05764	0.0004721			R squared	0.01431	0.0003829	0.1356	0.004249			R squared	0.003852	0.04893	0.04479	0.003189			R squared	0.006628	0.0283	0.02877	0.0752
Sum of Squares	672.5	789.5	2183	468.2			Sum of Squares	144514	531217	823566	699762			Sum of Squares	11267	29567	35328	19926			Sum of Squares	104.6	485.8	721.4	469.2			Sum of Squares	702.1	3037	3537	950.4
Normality of Residuals							Normality of Residuals							Normality of Residuals							Normality of Residuals							Normality of Residuals
D'Agostino-Pearson omnibus (K2)	17.05	54.24	27.29	7.822			D'Agostino-Pearson omnibus (K2)	12.62	15.4	21.41	24.46			D'Agostino-Pearson omnibus (K2)	1.966	12.95	18.78	12.53			D'Agostino-Pearson omnibus (K2)	5.254	25.69	24.96	13.74			D'Agostino-Pearson omnibus (K2)	11.46	0.9633	0.3381	0.6339
P value	0.0002	<0.0001	<0.0001	0.02			P value	0.0018	0.0005	<0.0001	<0.0001			P value	0.3742	0.0015	<0.0001	0.0019			P value	0.0723	<0.0001	<0.0001	0.001			P value	0.0032	0.6178	0.8445	0.7284
Passed normality test (alpha=0.05)?	No	No	No	No			Passed normality test (alpha=0.05)?	No	No	No	No			Passed normality test (alpha=0.05)?	Yes	No	No	No			Passed normality test (alpha=0.05)?	Yes	No	No	No			Passed normality test (alpha=0.05)?	No	Yes	Yes	Yes
P value summary	***	****	****	*			P value summary	**	***	****	****			P value summary	ns	**	****	**			P value summary	ns	****	****	**			P value summary	**	ns	ns	ns
Test for homoscedasticity							Test for homoscedasticity							Test for homoscedasticity							Test for homoscedasticity							Test for homoscedasticity
Rs of predicted Y vs. |residual|	-0.09761	0.1424	0.2598	0.1482			Rs of predicted Y vs. |residual|	0.331	0.1142	-0.06768	0.2856			Rs of predicted Y vs. |residual|	0.3309	0.1148	0.04687	-0.01969			Rs of predicted Y vs. |residual|	0.2341	0.1076	0.03146	0.435			Rs of predicted Y vs. |residual|	-0.3643	0.236	-0.1602	0.2272
P value (one tailed)	0.3455	0.1164	0.0034	0.2304			P value (one tailed)	0.0831	0.1698	0.2412	0.0743			P value (one tailed)	0.0832	0.1685	0.3134	0.4612			P value (one tailed)	0.1674	0.1841	0.3721	0.0117			P value (one tailed)	0.0864	0.0313	0.0691	0.1676
Passed (P > 0.05)?	Yes	Yes	No	Yes			Passed (P > 0.05)?	Yes	Yes	Yes	Yes			Passed (P > 0.05)?	Yes	Yes	Yes	Yes			Passed (P > 0.05)?	Yes	Yes	Yes	No			Passed (P > 0.05)?	Yes	No	Yes	Yes
Slope = 0							Slope = 0							Slope = 0							Slope = 0							Slope = 0
Best-fit values							Best-fit values							Best-fit values							Best-fit values							Best-fit values
YIntercept	0.9829	0.6746	0.9172	0.8909			YIntercept	2.065	2.107	2.098	2.21			YIntercept	1.593	1.45	1.445	1.551			YIntercept	0.5548	0.5501	0.5601	0.6775			YIntercept	1.559	1.524	1.551	1.558
Slope	= 0.000	= 0.000	= 0.000	= 0.000			Slope	= 0.000	= 0.000	= 0.000	= 0.000			Slope	= 0.000	= 0.000	= 0.000	= 0.000			Slope	= 0.000	= 0.000	= 0.000	= 0.000			Slope	= 0.000	= 0.000	= 0.000	= 0.000
Goodness of Fit							Goodness of Fit							Goodness of Fit							Goodness of Fit							Goodness of Fit
Degrees of Freedom	18	71	106	26			Degrees of Freedom	18	71	109	26			Degrees of Freedom	18	71	109	26			Degrees of Freedom	18	71	109	26			Degrees of Freedom	15	62	86	19
R squared	3.331e-16	4.441e-16	6.661e-16	0			R squared	0	0	4.441e-16	4.441e-16			R squared	0	0	0	0			R squared	0	0	3.331e-16	0			R squared	0	0	0	0
Sum of Squares	707.6	799	3541	482.7			Sum of Squares	147116	545346	873941	700093			Sum of Squares	11431	29578	40870	20011			Sum of Squares	105	510.8	755.2	470.7			Sum of Squares	706.8	3126	3641	1028
Normality of Residuals							Normality of Residuals							Normality of Residuals							Normality of Residuals							Normality of Residuals
D'Agostino-Pearson omnibus (K2)	10.24	56.46	40.08	5.235			D'Agostino-Pearson omnibus (K2)	15.2	18.3	18.7	24.9			D'Agostino-Pearson omnibus (K2)	2.163	13.18	12.44	11.06			D'Agostino-Pearson omnibus (K2)	6.002	29.64	22.14	14.84			D'Agostino-Pearson omnibus (K2)	9.571	2.056	0.2428	2.247
P value	0.006	<0.0001	<0.0001	0.073			P value	0.0005	0.0001	<0.0001	<0.0001			P value	0.3391	0.0014	0.002	0.004			P value	0.0497	<0.0001	<0.0001	0.0006			P value	0.0083	0.3578	0.8857	0.3252
Passed normality test (alpha=0.05)?	No	No	No	Yes			Passed normality test (alpha=0.05)?	No	No	No	No			Passed normality test (alpha=0.05)?	Yes	No	No	No			Passed normality test (alpha=0.05)?	No	No	No	No			Passed normality test (alpha=0.05)?	No	Yes	Yes	Yes
P value summary	**	****	****	ns			P value summary	***	***	****	****			P value summary	ns	**	**	**			P value summary	*	****	****	***			P value summary	**	ns	ns	ns
	CheRiff	CoChR	ChR2(H134R)	Chronos	ChrimsonR			CheRiff	CoChR	ChR2(H134R)	Chronos	ChrimsonR			CheRiff	CoChR	ChR2(H134R)	Chronos	ChrimsonR			CheRiff	CoChR	ChR2(H134R)	Chronos	ChrimsonR			CheRiff	CoChR	ChR2(H134R)	Chronos	ChrimsonR
Irradiance-dependent modulation of reponse latency - linear regression on log-log transformed data (459 nm, 10 ms pulse duration)							Irradiance-dependent modulation of bout duration - linear regression on log-log transformed data (459 nm, 10 ms pulse duration)							Irradiance-dependent modulation of theta-1 angle - linear regression on log-log transformed data (459 nm, 10 ms pulse duration)							Irradiance-dependent modulation of tail cycles - linear regression on log-log transformed data (459 nm, 10 ms pulse duration)							Irradiance-dependent modulation of tail beat frequency - linear regression on log-log transformed data (459 nm, 10 ms pulse duration)
Comparison of Fits							Comparison of Fits							Comparison of Fits							Comparison of Fits							Comparison of Fits
Null hypothesis	Slope = 0	Slope = 0	Slope = 0	Slope = 0	Slope = 0		Null hypothesis	Slope = 0	Slope = 0	Slope = 0	Slope = 0	Slope = 0		Null hypothesis	Slope = 0	Slope = 0	Slope = 0	Slope = 0	Slope = 0		Null hypothesis	Slope = 0	Slope = 0	Slope = 0	Slope = 0	Slope = 0		Null hypothesis	Slope = 0	Slope = 0	Slope = 0	Slope = 0	Slope = 0
Alternative hypothesis	Slope unconstrained	Slope unconstrained	Slope unconstrained	Slope unconstrained	Slope unconstrained		Alternative hypothesis	Slope unconstrained	Slope unconstrained	Slope unconstrained	Slope unconstrained	Slope unconstrained		Alternative hypothesis	Slope unconstrained	Slope unconstrained	Slope unconstrained	Slope unconstrained	Slope unconstrained		Alternative hypothesis	Slope unconstrained	Slope unconstrained	Slope unconstrained	Slope unconstrained	Slope unconstrained		Alternative hypothesis	Slope unconstrained	Slope unconstrained	Slope unconstrained	Slope unconstrained	Slope unconstrained
P value	0.5168	0.9478	0.003	0.1096	0.7038		P value	0.7218	0.263	0.4548	0.2736	0.782		P value	0.7823	0.7422	0.2365	0.1522	0.7858		P value	0.8506	0.267	0.5856	0.2756	0.7761		P value	0.2924	0.784	0.8385	0.9864	0.4707
Conclusion (alpha = 0.05)	Do not reject null hypothesis	Do not reject null hypothesis	Reject null hypothesis	Do not reject null hypothesis	Do not reject null hypothesis		Conclusion (alpha = 0.05)	Do not reject null hypothesis	Do not reject null hypothesis	Do not reject null hypothesis	Do not reject null hypothesis	Do not reject null hypothesis		Conclusion (alpha = 0.05)	Do not reject null hypothesis	Do not reject null hypothesis	Do not reject null hypothesis	Do not reject null hypothesis	Do not reject null hypothesis		Conclusion (alpha = 0.05)	Do not reject null hypothesis	Do not reject null hypothesis	Do not reject null hypothesis	Do not reject null hypothesis	Do not reject null hypothesis		Conclusion (alpha = 0.05)	Do not reject null hypothesis	Do not reject null hypothesis	Do not reject null hypothesis	Do not reject null hypothesis	Do not reject null hypothesis
Preferred model	Slope = 0	Slope = 0	Slope unconstrained	Slope = 0	Slope = 0		Preferred model	Slope = 0	Slope = 0	Slope = 0	Slope = 0	Slope = 0		Preferred model	Slope = 0	Slope = 0	Slope = 0	Slope = 0	Slope = 0		Preferred model	Slope = 0	Slope = 0	Slope = 0	Slope = 0	Slope = 0		Preferred model	Slope = 0	Slope = 0	Slope = 0	Slope = 0	Slope = 0
F (DFn, DFd)	0.4307 (1, 29)	0.004356 (1, 30)	10.41 (1, 30)	2.720 (1, 30)	0.1506 (1, 14)		F (DFn, DFd)	0.1293 (1, 29)	1.301 (1, 30)	0.5718 (1, 34)	1.244 (1, 30)	0.07961 (1, 14)		F (DFn, DFd)	0.07780 (1, 29)	0.1102 (1, 30)	1.452 (1, 34)	2.158 (1, 30)	0.07672 (1, 14)		F (DFn, DFd)	0.03610 (1, 29)	1.279 (1, 30)	0.3030 (1, 34)	1.233 (1, 30)	0.08409 (1, 14)		F (DFn, DFd)	1.161 (1, 23)	0.07664 (1, 27)	0.04251 (1, 23)	0.0002970 (1, 24)	0.5548 (1, 12)
Slope unconstrained							Slope unconstrained							Slope unconstrained							Slope unconstrained							Slope unconstrained
Best-fit values							Best-fit values							Best-fit values							Best-fit values							Best-fit values
YIntercept	1.056	0.5355	1.087	1	1.184		YIntercept	2.126	2.008	1.959	1.931	2.118		YIntercept	1.716	1.496	1.606	1.343	1.499		YIntercept	0.5516	0.4726	0.4556	0.4237	0.6545		YIntercept	1.503	1.559	1.545	1.555	1.642
Slope	-0.2714	0.01364	-0.7028	-0.5746	0.1601		Slope	-0.1227	0.334	0.2033	0.8414	-0.3515		Slope	-0.09399	-0.06186	0.1724	0.7199	0.3176		Slope	0.06252	0.3062	0.136	0.7266	-0.3886		Slope	0.1162	0.01811	-0.02586	0.002772	-0.1958
Goodness of Fit							Goodness of Fit							Goodness of Fit							Goodness of Fit							Goodness of Fit
Degrees of Freedom	29	30	30	30	14		Degrees of Freedom	29	30	34	30	14		Degrees of Freedom	29	30	34	30	14		Degrees of Freedom	29	30	34	30	14		Degrees of Freedom	23	27	23	24	12
R squared	0.01463	0.0001452	0.2577	0.08312	0.01064		R squared	0.004438	0.04157	0.01654	0.03981	0.005654		R squared	0.002675	0.00366	0.04096	0.06711	0.00545		R squared	0.001243	0.0409	0.008833	0.03949	0.00597		R squared	0.04805	0.00283	0.001845	1.238e-05	0.04419
Sum of Squares	1034	141.9	1010	396.8	282.3		Sum of Squares	111842	261806	207015	759915	86211		Sum of Squares	18582	8741	11273	16602	11931		Sum of Squares	95.05	187.2	167.4	477.1	111.3		Sum of Squares	392.2	1251	788.5	1259	400.4
Normality of Residuals							Normality of Residuals							Normality of Residuals							Normality of Residuals							Normality of Residuals
D'Agostino-Pearson omnibus (K2)	8.4	23.61	5.086	7.592	0.6313		D'Agostino-Pearson omnibus (K2)	4.77	12.54	7.973	33.54	5.168		D'Agostino-Pearson omnibus (K2)	8.584	6.184	1.374	2.933	2.475		D'Agostino-Pearson omnibus (K2)	0.8743	5.483	8.629	26.84	5.186		D'Agostino-Pearson omnibus (K2)	0.8392	1.835	1.947	0.4028	0.4969
P value	0.015	<0.0001	0.0786	0.0225	0.7293		P value	0.0921	0.0019	0.0186	<0.0001	0.0755		P value	0.0137	0.0454	0.5032	0.2307	0.2902		P value	0.6459	0.0645	0.0134	<0.0001	0.0748		P value	0.6573	0.3995	0.3777	0.8176	0.78
Passed normality test (alpha=0.05)?	No	No	Yes	No	Yes		Passed normality test (alpha=0.05)?	Yes	No	No	No	Yes		Passed normality test (alpha=0.05)?	No	No	Yes	Yes	Yes		Passed normality test (alpha=0.05)?	Yes	Yes	No	No	Yes		Passed normality test (alpha=0.05)?	Yes	Yes	Yes	Yes	Yes
P value summary	*	****	ns	*	ns		P value summary	ns	**	*	****	ns		P value summary	*	*	ns	ns	ns		P value summary	ns	ns	*	****	ns		P value summary	ns	ns	ns	ns	ns
Test for homoscedasticity							Test for homoscedasticity							Test for homoscedasticity							Test for homoscedasticity							Test for homoscedasticity
Rs of predicted Y vs. |residual|	-0.04942	0.2643	0.2297	0.1557	-0.1401		Rs of predicted Y vs. |residual|	-0.007303	0.5207	0.1168	-0.04631	0.5881		Rs of predicted Y vs. |residual|	0.1489	0.1877	-0.1056	-0.1168	0.02801		Rs of predicted Y vs. |residual|	-0.2341	0.5906	-0.01761	-0.09705	0.6207		Rs of predicted Y vs. |residual|	0.0473	-0.07045	-0.3467	0.05213	0.3883
P value (one tailed)	0.3959	0.0719	0.103	0.1975	0.3083		P value (one tailed)	0.4844	0.0011	0.2487	0.4006	0.0112		P value (one tailed)	0.2121	0.1518	0.27	0.2623	0.4789		P value (one tailed)	0.1025	0.0002	0.4594	0.2986	0.0069		P value (one tailed)	0.4112	0.3583	0.0448	0.4002	0.0949
Passed (P > 0.05)?	Yes	Yes	Yes	Yes	Yes		Passed (P > 0.05)?	Yes	No	Yes	Yes	No		Passed (P > 0.05)?	Yes	Yes	Yes	Yes	Yes		Passed (P > 0.05)?	Yes	No	Yes	Yes	No		Passed (P > 0.05)?	Yes	Yes	No	Yes	Yes
Slope = 0							Slope = 0							Slope = 0							Slope = 0							Slope = 0
Best-fit values							Best-fit values							Best-fit values							Best-fit values							Best-fit values
YIntercept	0.9799	0.5376	0.9787	0.8313	1.24		YIntercept	2.092	2.064	1.999	2.193	1.994		YIntercept	1.689	1.487	1.639	1.567	1.613		YIntercept	0.5693	0.5236	0.4818	0.6487	0.5174		YIntercept	1.539	1.562	1.539	1.556	1.572
Slope	= 0.000	= 0.000	= 0.000	= 0.000	= 0.000		Slope	= 0.000	= 0.000	= 0.000	= 0.000	= 0.000		Slope	= 0.000	= 0.000	= 0.000	= 0.000	= 0.000		Slope	= 0.000	= 0.000	= 0.000	= 0.000	= 0.000		Slope	= 0.000	= 0.000	= 0.000	= 0.000	= 0.000
Goodness of Fit							Goodness of Fit							Goodness of Fit							Goodness of Fit							Goodness of Fit
Degrees of Freedom	30	31	31	31	15		Degrees of Freedom	30	31	35	31	15		Degrees of Freedom	30	31	35	31	15		Degrees of Freedom	30	31	35	31	15		Degrees of Freedom	24	28	24	25	13
R squared	0	0	-4.441e-16	0	0		R squared	0	0	0	0	0		R squared	0	0	0	0	0		R squared	3.331e-16	0	0	0	0		R squared	0	0	0	0	0
Sum of Squares	1049	141.9	1361	432.8	285.4		Sum of Squares	112341	273160	210496	791422	86701		Sum of Squares	18631	8773	11754	17796	11997		Sum of Squares	95.16	195.1	168.9	496.7	112		Sum of Squares	412	1254	789.9	1259	418.9
Normality of Residuals							Normality of Residuals							Normality of Residuals							Normality of Residuals							Normality of Residuals
D'Agostino-Pearson omnibus (K2)	7.431	23.8	9.953	5.826	0.5427		D'Agostino-Pearson omnibus (K2)	4.894	15	8.683	33.87	5.782		D'Agostino-Pearson omnibus (K2)	9.184	7.112	1.249	1.655	2.342		D'Agostino-Pearson omnibus (K2)	0.8721	7.066	8.562	26.41	5.866		D'Agostino-Pearson omnibus (K2)	1.824	1.511	1.434	0.4087	0.2707
P value	0.0243	<0.0001	0.0069	0.0543	0.7623		P value	0.0865	0.0006	0.013	<0.0001	0.0555		P value	0.0101	0.0286	0.5356	0.4372	0.31		P value	0.6466	0.0292	0.0138	<0.0001	0.0532		P value	0.4017	0.4698	0.4881	0.8152	0.8734
Passed normality test (alpha=0.05)?	No	No	No	Yes	Yes		Passed normality test (alpha=0.05)?	Yes	No	No	No	Yes		Passed normality test (alpha=0.05)?	No	No	Yes	Yes	Yes		Passed normality test (alpha=0.05)?	Yes	No	No	No	Yes		Passed normality test (alpha=0.05)?	Yes	Yes	Yes	Yes	Yes
P value summary	*	****	**	ns	ns		P value summary	ns	***	*	****	ns		P value summary	*	*	ns	ns	ns		P value summary	ns	*	*	****	ns		P value summary	ns	ns	ns	ns	ns
	ChrimsonR							ChrimsonR							ChrimsonR							ChrimsonR							ChrimsonR
Irradiance-dependent modulation of reponse latency - linear regression on log-log transformed data (617 nm, 10 ms pulse duration)							Irradiance-dependent modulation of bout duration - linear regression on log-log transformed data (617 nm, 10 ms pulse duration)							Irradiance-dependent modulation of theta-1 angle - linear regression on log-log transformed data (617 nm, 10 ms pulse duration)							Irradiance-dependent modulation of tail cycles - linear regression on log-log transformed data (617 nm, 10 ms pulse duration)							Irradiance-dependent modulation of tail beat frequency - linear regression on log-log transformed data (617 nm, 10 ms pulse duration)
Comparison of Fits							Comparison of Fits							Comparison of Fits							Comparison of Fits							Comparison of Fits
Null hypothesis	Slope = 0						Null hypothesis	Slope = 0						Null hypothesis	Slope = 0						Null hypothesis	Slope = 0						Null hypothesis	Slope = 0
Alternative hypothesis	Slope unconstrained						Alternative hypothesis	Slope unconstrained						Alternative hypothesis	Slope unconstrained						Alternative hypothesis	Slope unconstrained						Alternative hypothesis	Slope unconstrained
P value	0.0003						P value	0.2602						P value	0.5703						P value	0.2687						P value	0.9984
Conclusion (alpha = 0.05)	Reject null hypothesis						Conclusion (alpha = 0.05)	Do not reject null hypothesis						Conclusion (alpha = 0.05)	Do not reject null hypothesis						Conclusion (alpha = 0.05)	Do not reject null hypothesis						Conclusion (alpha = 0.05)	Do not reject null hypothesis
Preferred model	Slope unconstrained						Preferred model	Slope = 0						Preferred model	Slope = 0						Preferred model	Slope = 0						Preferred model	Slope = 0
F (DFn, DFd)	14.46 (1, 62)						F (DFn, DFd)	1.291 (1, 62)						F (DFn, DFd)	0.3256 (1, 62)						F (DFn, DFd)	1.246 (1, 62)						F (DFn, DFd)	4.084e-006 (1, 51)
Slope unconstrained							Slope unconstrained							Slope unconstrained							Slope unconstrained							Slope unconstrained
Best-fit values							Best-fit values							Best-fit values							Best-fit values							Best-fit values
YIntercept	1.138						YIntercept	1.967						YIntercept	1.582						YIntercept	0.4752						YIntercept	1.571
Slope	-0.9358						Slope	-0.4278						Slope	-0.2926						Slope	-0.4285						Slope	-0.0003008
Goodness of Fit							Goodness of Fit							Goodness of Fit							Goodness of Fit							Goodness of Fit
Degrees of Freedom	62						Degrees of Freedom	62						Degrees of Freedom	62						Degrees of Freedom	62						Degrees of Freedom	51
R squared	0.1891						R squared	0.0204						R squared	0.005224						R squared	0.01969						R squared	8.008e-08
Sum of Squares	2139						Sum of Squares	175093						Sum of Squares	52016						Sum of Squares	185.8						Sum of Squares	2372
Normality of Residuals							Normality of Residuals							Normality of Residuals							Normality of Residuals							Normality of Residuals
D'Agostino-Pearson omnibus (K2)	32.95						D'Agostino-Pearson omnibus (K2)	10.11						D'Agostino-Pearson omnibus (K2)	5.919						D'Agostino-Pearson omnibus (K2)	8.897						D'Agostino-Pearson omnibus (K2)	0.8535
P value	<0.0001						P value	0.0064						P value	0.0518						P value	0.0117						P value	0.6526
Passed normality test (alpha=0.05)?	No						Passed normality test (alpha=0.05)?	No						Passed normality test (alpha=0.05)?	Yes						Passed normality test (alpha=0.05)?	No						Passed normality test (alpha=0.05)?	Yes
P value summary	****						P value summary	**						P value summary	ns						P value summary	*						P value summary	ns
Test for homoscedasticity							Test for homoscedasticity							Test for homoscedasticity							Test for homoscedasticity							Test for homoscedasticity
Rs of predicted Y vs. |residual|	0.1716						Rs of predicted Y vs. |residual|	0.2377						Rs of predicted Y vs. |residual|	0.1173						Rs of predicted Y vs. |residual|	0.1835						Rs of predicted Y vs. |residual|	-0.3307
P value (one tailed)	0.0876						P value (one tailed)	0.0293						P value (one tailed)	0.178						P value (one tailed)	0.0734						P value (one tailed)	0.0078
Passed (P > 0.05)?	Yes						Passed (P > 0.05)?	No						Passed (P > 0.05)?	Yes						Passed (P > 0.05)?	Yes						Passed (P > 0.05)?	No
Slope = 0							Slope = 0							Slope = 0							Slope = 0							Slope = 0
Best-fit values							Best-fit values							Best-fit values							Best-fit values							Best-fit values
YIntercept	1.203						YIntercept	1.995						YIntercept	1.601						YIntercept	0.5038						YIntercept	1.571
Slope	= 0.000						Slope	= 0.000						Slope	= 0.000						Slope	= 0.000						Slope	= 0.000
Goodness of Fit							Goodness of Fit							Goodness of Fit							Goodness of Fit							Goodness of Fit
Degrees of Freedom	63						Degrees of Freedom	63						Degrees of Freedom	63						Degrees of Freedom	63						Degrees of Freedom	52
R squared	-4.441e-16						R squared	4.441e-16						R squared	0						R squared	3.331e-16						R squared	0
Sum of Squares	2638						Sum of Squares	178740						Sum of Squares	52289						Sum of Squares	189.5						Sum of Squares	2372
Normality of Residuals							Normality of Residuals							Normality of Residuals							Normality of Residuals							Normality of Residuals
D'Agostino-Pearson omnibus (K2)	26.66						D'Agostino-Pearson omnibus (K2)	7.298						D'Agostino-Pearson omnibus (K2)	6.536						D'Agostino-Pearson omnibus (K2)	5.978						D'Agostino-Pearson omnibus (K2)	0.8533
P value	<0.0001						P value	0.026						P value	0.0381						P value	0.0503						P value	0.6527
Passed normality test (alpha=0.05)?	No						Passed normality test (alpha=0.05)?	No						Passed normality test (alpha=0.05)?	No						Passed normality test (alpha=0.05)?	Yes						Passed normality test (alpha=0.05)?	Yes
P value summary	****						P value summary	*						P value summary	*						P value summary	ns						P value summary	ns

## Sheet: Figure 3L-Q
Figure 3L	CheRiff	CoChR	ChR2(H134R)	Chronos	ChrimsonR		Figure 3M	CheRiff	CoChR	ChR2(H134R)	Chronos	ChrimsonR		Figure 3N	CheRiff	CoChR	ChR2(H134R)	Chronos	ChrimsonR		Figure 3O	CheRiff	CoChR	ChR2(H134R)	Chronos	ChrimsonR		Figure 3P	CheRiff	CoChR	ChR2(H134R)	Chronos	ChrimsonR		Figure 3Q	CheRiff	CoChR	ChR2(H134R)	Chronos	ChrimsonR
Irradiance-dependent modulation of reponse probability - linear regression (20 vs. 40 Hz pulse train stimulation)							Irradiance-dependent modulation of reponse latency - linear regression (20 vs. 40 Hz pulse train stimulation)							Irradiance-dependent modulation of reponse duration - linear regression (20 vs. 40 Hz pulse train stimulation)							Irradiance-dependent modulation of theta-1 angle - linear regression (20 vs. 40 Hz pulse train stimulation)							Irradiance-dependent modulation of tail cycles - linear regression (20 vs. 40 Hz pulse train stimulation)							Irradiance-dependent modulation of tail beat frequency - linear regression (20 vs. 40 Hz pulse train stimulation)
Comparison of Fits							Comparison of Fits							Comparison of Fits							Comparison of Fits							Comparison of Fits							Comparison of Fits
Null hypothesis	Slope = 0	Slope = 0	Slope = 0	Slope = 0	Slope = 0		Null hypothesis	Slope = 0	Slope = 0	Slope = 0	Slope = 0	Slope = 0		Null hypothesis	Slope = 0	Slope = 0	Slope = 0	Slope = 0	Slope = 0		Null hypothesis	Slope = 0	Slope = 0	Slope = 0	Slope = 0	Slope = 0		Null hypothesis	Slope = 0	Slope = 0	Slope = 0	Slope = 0	Slope = 0		Null hypothesis	Slope = 0	Slope = 0	Slope = 0	Slope = 0	Slope = 0
Alternative hypothesis	Slope unconstrained	Slope unconstrained	Slope unconstrained	Slope unconstrained	Slope unconstrained		Alternative hypothesis	Slope unconstrained	Slope unconstrained	Slope unconstrained	Slope unconstrained	Slope unconstrained		Alternative hypothesis	Slope unconstrained	Slope unconstrained	Slope unconstrained	Slope unconstrained	Slope unconstrained		Alternative hypothesis	Slope unconstrained	Slope unconstrained	Slope unconstrained	Slope unconstrained	Slope unconstrained		Alternative hypothesis	Slope unconstrained	Slope unconstrained	Slope unconstrained	Slope unconstrained	Slope unconstrained		Alternative hypothesis	Slope unconstrained	Slope unconstrained	Slope unconstrained	Slope unconstrained	Slope unconstrained
P value	0.6067	0.3216	0.4202	0.028	0.4804		P value	0.9956	0.8358	0.9983	0.3227	0.4108		P value	0.4153	0.0447	0.4338	0.0632	0.0565		P value	0.7507	0.7795	0.6846	0.1825	0.2775		P value	0.4584	0.013	0.3026	0.113	0.0256		P value	0.5233	0.298	0.8334	0.6886	0.5595
Conclusion (alpha = 0.05)	Do not reject null hypothesis	Do not reject null hypothesis	Do not reject null hypothesis	Reject null hypothesis	Do not reject null hypothesis		Conclusion (alpha = 0.05)	Do not reject null hypothesis	Do not reject null hypothesis	Do not reject null hypothesis	Do not reject null hypothesis	Do not reject null hypothesis		Conclusion (alpha = 0.05)	Do not reject null hypothesis	Reject null hypothesis	Do not reject null hypothesis	Do not reject null hypothesis	Do not reject null hypothesis		Conclusion (alpha = 0.05)	Do not reject null hypothesis	Do not reject null hypothesis	Do not reject null hypothesis	Do not reject null hypothesis	Do not reject null hypothesis		Conclusion (alpha = 0.05)	Do not reject null hypothesis	Reject null hypothesis	Do not reject null hypothesis	Do not reject null hypothesis	Reject null hypothesis		Conclusion (alpha = 0.05)	Do not reject null hypothesis	Do not reject null hypothesis	Do not reject null hypothesis	Do not reject null hypothesis	Do not reject null hypothesis
Preferred model	Slope = 0	Slope = 0	Slope = 0	Slope unconstrained	Slope = 0		Preferred model	Slope = 0	Slope = 0	Slope = 0	Slope = 0	Slope = 0		Preferred model	Slope = 0	Slope unconstrained	Slope = 0	Slope = 0	Slope = 0		Preferred model	Slope = 0	Slope = 0	Slope = 0	Slope = 0	Slope = 0		Preferred model	Slope = 0	Slope unconstrained	Slope = 0	Slope = 0	Slope unconstrained		Preferred model	Slope = 0	Slope = 0	Slope = 0	Slope = 0	Slope = 0
F (DFn, DFd)	0.2700 (1, 34)	1.000 (1, 56)	0.6581 (1, 64)	5.245 (1, 36)	0.5106 (1, 30)		F (DFn, DFd)	3.151e-005 (1, 16)	0.04338 (1, 56)	4.419e-006 (1, 64)	1.019 (1, 24)	0.7058 (1, 20)		F (DFn, DFd)	0.6935 (1, 19)	4.216 (1, 56)	0.6204 (1, 64)	3.767 (1, 26)	4.000 (1, 25)		F (DFn, DFd)	0.1040 (1, 19)	0.07911 (1, 56)	0.1666 (1, 64)	1.876 (1, 26)	1.232 (1, 25)		F (DFn, DFd)	0.5729 (1, 19)	6.586 (1, 56)	1.080 (1, 64)	2.690 (1, 26)	5.637 (1, 25)		F (DFn, DFd)	0.4259 (1, 16)	1.104 (1, 54)	0.04464 (1, 63)	0.1647 (1, 23)	0.3518 (1, 21)
Slope unconstrained							Slope unconstrained							Slope unconstrained							Slope unconstrained							Slope unconstrained							Slope unconstrained
Best-fit values							Best-fit values							Best-fit values							Best-fit values							Best-fit values							Best-fit values
YIntercept	-0.7113	0.01299	-0.06881	-1.374	-0.4827		YIntercept	1.007	0.8281	0.8267	0.3162	0.8244		YIntercept	2.672	1.83	2.171	1.159	1.235		YIntercept	1.821	1.557	1.36	0.6727	2.165		YIntercept	1.062	0.1519	0.5515	-0.1991	-0.3978		YIntercept	1.435	1.467	1.524	1.493	1.495
Slope	0.25	-0.009984	0.0363	0.759	0.2141		Slope	-0.001903	-0.06063	0.0004338	0.4365	0.2061		Slope	-0.3276	0.373	0.15	0.6433	0.6464		Slope	-0.09819	-0.07059	0.08585	0.557	-0.4259		Slope	-0.276	0.474	0.1963	0.5422	0.7301		Slope	0.06594	0.05618	0.009099	0.04796	0.04123
Goodness of Fit							Goodness of Fit							Goodness of Fit							Goodness of Fit							Goodness of Fit							Goodness of Fit
Degrees of Freedom	34	56	64	36	30		Degrees of Freedom	16	56	64	24	20		Degrees of Freedom	19	56	64	26	25		Degrees of Freedom	19	56	64	26	25		Degrees of Freedom	19	56	64	26	25		Degrees of Freedom	16	54	63	23	21
R squared	0.007879	0.01754	0.01018	0.1272	0.01674		R squared	1.97e-06	0.0007741	6.905e-08	0.04075	0.03409		R squared	0.03522	0.07001	0.009601	0.1265	0.1379		R squared	0.005442	0.001411	0.002596	0.06729	0.04698		R squared	0.02927	0.1052	0.01659	0.09376	0.184		R squared	0.02593	0.02004	0.000708	0.007111	0.01647
Sum of Squares	6.856	0.03862	0.943	5.267	4.7		Sum of Squares	401.2	999	975.3	1114	544.5		Sum of Squares	183601	714745	1104579	146406	191218		Sum of Squares	10082	19900	20943	13154	14859		Sum of Squares	134	642.5	853.6	142	165		Sum of Squares	401.7	1296	1084	1236	359.7
Normality of Residuals							Normality of Residuals							Normality of Residuals							Normality of Residuals							Normality of Residuals							Normality of Residuals
D'Agostino-Pearson omnibus (K2)	92.14	126.3	95.72	4.193	6.779		D'Agostino-Pearson omnibus (K2)	1.082	75.63	32.8	14.1	1.544		D'Agostino-Pearson omnibus (K2)	0.5279	1.191	18.33	1.177	0.03717		D'Agostino-Pearson omnibus (K2)	3.155	4.092	10.35	2.595	13.01		D'Agostino-Pearson omnibus (K2)	0.7088	0.8785	33.39	2.822	0.5545		D'Agostino-Pearson omnibus (K2)	5.345	4.763	1.673	0.1206	2.505
P value	<0.0001	<0.0001	<0.0001	0.1229	0.0337		P value	0.5821	<0.0001	<0.0001	0.0009	0.462		P value	0.768	0.5513	0.0001	0.5553	0.9816		P value	0.2065	0.1293	0.0057	0.2733	0.0015		P value	0.7016	0.6445	<0.0001	0.2438	0.7579		P value	0.0691	0.0924	0.4332	0.9415	0.2858
Passed normality test (alpha=0.05)?	No	No	No	Yes	No		Passed normality test (alpha=0.05)?	Yes	No	No	No	Yes		Passed normality test (alpha=0.05)?	Yes	Yes	No	Yes	Yes		Passed normality test (alpha=0.05)?	Yes	Yes	No	Yes	No		Passed normality test (alpha=0.05)?	Yes	Yes	No	Yes	Yes		Passed normality test (alpha=0.05)?	Yes	Yes	Yes	Yes	Yes
P value summary	****	****	****	ns	*		P value summary	ns	****	****	***	ns		P value summary	ns	ns	***	ns	ns		P value summary	ns	ns	**	ns	**		P value summary	ns	ns	****	ns	ns		P value summary	ns	ns	ns	ns	ns
Test for homoscedasticity							Test for homoscedasticity							Test for homoscedasticity							Test for homoscedasticity							Test for homoscedasticity							Test for homoscedasticity
Rs of predicted Y vs. |residual|	0.3145	-0.9918	-0.7832	-0.08496	-0.4542		Rs of predicted Y vs. |residual|	0.06465	0.1025	0.01989	0.4223	0.09475		Rs of predicted Y vs. |residual|	0.09448	-0.38	0.0167	-0.1787	0.5139		Rs of predicted Y vs. |residual|	-0.3936	0.09372	-0.1964	-0.06254	0.1047		Rs of predicted Y vs. |residual|	0.07888	-0.2338	-0.1169	-0.1431	0.3808		Rs of predicted Y vs. |residual|	-0.1293	-0.2863	-0.06725	-0.05662	0.2887
P value (one tailed)	0.0309	<0.0001	<0.0001	0.306	0.0045		P value (one tailed)	0.3994	0.2219	0.437	0.0158	0.3375		P value (one tailed)	0.3419	0.0016	0.4471	0.1815	0.0031		P value (one tailed)	0.0387	0.242	0.0569	0.3759	0.3017		P value (one tailed)	0.367	0.0387	0.1749	0.2337	0.025		P value (one tailed)	0.3046	0.0162	0.2973	0.394	0.0908
Passed (P > 0.05)?	No	No	No	Yes	No		Passed (P > 0.05)?	Yes	Yes	Yes	No	Yes		Passed (P > 0.05)?	Yes	No	Yes	Yes	No		Passed (P > 0.05)?	No	Yes	Yes	Yes	Yes		Passed (P > 0.05)?	Yes	No	Yes	Yes	No		Passed (P > 0.05)?	Yes	No	Yes	Yes	Yes
Slope = 0							Slope = 0							Slope = 0							Slope = 0							Slope = 0							Slope = 0
Best-fit values							Best-fit values							Best-fit values							Best-fit values							Best-fit values							Best-fit values
YIntercept	-0.3468	-0.0015	-0.01609	-0.2576	-0.1707		YIntercept	1.005	0.7402	0.8273	0.9598	1.119		YIntercept	2.197	2.375	2.39	2.116	2.188		YIntercept	1.678	1.454	1.485	1.501	1.549		YIntercept	0.6613	0.8457	0.8374	0.6069	0.6797		YIntercept	1.532	1.549	1.538	1.564	1.555
Slope	= 0.000	= 0.000	= 0.000	= 0.000	= 0.000		Slope	= 0.000	= 0.000	= 0.000	= 0.000	= 0.000		Slope	= 0.000	= 0.000	= 0.000	= 0.000	= 0.000		Slope	= 0.000	= 0.000	= 0.000	= 0.000	= 0.000		Slope	= 0.000	= 0.000	= 0.000	= 0.000	= 0.000		Slope	= 0.000	= 0.000	= 0.000	= 0.000	= 0.000
Goodness of Fit							Goodness of Fit							Goodness of Fit							Goodness of Fit							Goodness of Fit							Goodness of Fit
Degrees of Freedom	35	57	65	37	31		Degrees of Freedom	17	57	65	25	21		Degrees of Freedom	20	57	65	27	26		Degrees of Freedom	20	57	65	27	26		Degrees of Freedom	20	57	65	27	26		Degrees of Freedom	17	55	64	24	22
R squared	0	0	1.554e-15	0	-4.441e-16		R squared	0	7.772e-16	0	0	0		R squared	0	0	0	0	0		R squared	0	0	-4.441e-16	0	0		R squared	0	0	0	0	0		R squared	0	0	0	0	0
Sum of Squares	6.91	0.03931	0.9527	6.035	4.78		Sum of Squares	401.2	999.8	975.3	1161	563.7		Sum of Squares	190303	768554	1115287	167617	221809		Sum of Squares	10138	19928	20997	14103	15591		Sum of Squares	138.1	718	868	156.6	202.1		Sum of Squares	412.4	1323	1085	1244	365.7
Normality of Residuals							Normality of Residuals							Normality of Residuals							Normality of Residuals							Normality of Residuals							Normality of Residuals
D'Agostino-Pearson omnibus (K2)	88.81	128.4	97.35	27.04	7.474		D'Agostino-Pearson omnibus (K2)	1.077	75.77	32.8	18.53	0.8209		D'Agostino-Pearson omnibus (K2)	0.9142	2.679	18.69	1.455	1.713		D'Agostino-Pearson omnibus (K2)	3.042	4.426	11.01	2.187	16.04		D'Agostino-Pearson omnibus (K2)	1.239	2.051	33.46	0.9742	1.517		D'Agostino-Pearson omnibus (K2)	4.213	3.913	1.742	0.08583	1.686
P value	<0.0001	<0.0001	<0.0001	<0.0001	0.0238		P value	0.5835	<0.0001	<0.0001	<0.0001	0.6633		P value	0.6331	0.2619	<0.0001	0.4831	0.4246		P value	0.2185	0.1094	0.0041	0.335	0.0003		P value	0.5382	0.3587	<0.0001	0.6144	0.4684		P value	0.1216	0.1413	0.4185	0.958	0.4304
Passed normality test (alpha=0.05)?	No	No	No	No	No		Passed normality test (alpha=0.05)?	Yes	No	No	No	Yes		Passed normality test (alpha=0.05)?	Yes	Yes	No	Yes	Yes		Passed normality test (alpha=0.05)?	Yes	Yes	No	Yes	No		Passed normality test (alpha=0.05)?	Yes	Yes	No	Yes	Yes		Passed normality test (alpha=0.05)?	Yes	Yes	Yes	Yes	Yes
P value summary	****	****	****	****	*		P value summary	ns	****	****	****	ns		P value summary	ns	ns	****	ns	ns		P value summary	ns	ns	**	ns	***		P value summary	ns	ns	****	ns	ns		P value summary	ns	ns	ns	ns	ns

## Sheet: Figure 6F-G
Figure 6F	GtACR2	GtACR1	eArch3.0	eNpHR3.0	WT
Irradiance-dependent modulation of coil rate during 'late LED On' - linear regression on log-log transformed data (470 nm, 10 s pulse duration)							Comparison of coil rate changes between opsins during 'late LED On' (470 nm, 10 s pulse duration, 0 μW/mm2)												Comparison of coil rate changes between opsins during 'late LED On' (470 nm, 10 s pulse duration, 0.07 μW/mm2)												Comparison of coil rate changes between opsins during 'late LED On' (470 nm, 10 s pulse duration, 1.68 μW/mm2)												Comparison of coil rate changes between opsins during 'late LED On' (470 nm, 10 s pulse duration, 8.45 μW/mm2)
Comparison of Fits							Kruskal-Wallis test												Kruskal-Wallis test												Kruskal-Wallis test												Kruskal-Wallis test
Null hypothesis	Slope = 0	Slope = 0	Slope = 0	Slope = 0	Slope = 0		P value	0.7325											P value	0.0119											P value	<0.0001											P value	<0.0001
Alternative hypothesis	Slope unconstrained	Slope unconstrained	Slope unconstrained	Slope unconstrained	Slope unconstrained		Exact or approximate P value?	Approximate											Exact or approximate P value?	Approximate											Exact or approximate P value?	Approximate											Exact or approximate P value?	Approximate
P value	<0.0001	<0.0001	<0.0001	<0.0001	<0.0001		P value summary	ns											P value summary	*											P value summary	****											P value summary	****
Conclusion (alpha = 0.05)	Reject null hypothesis	Reject null hypothesis	Reject null hypothesis	Reject null hypothesis	Reject null hypothesis		Do the medians vary signif. (P < 0.05)?	No											Do the medians vary signif. (P < 0.05)?	Yes											Do the medians vary signif. (P < 0.05)?	Yes											Do the medians vary signif. (P < 0.05)?	Yes
Preferred model	Slope unconstrained	Slope unconstrained	Slope unconstrained	Slope unconstrained	Slope unconstrained		Number of groups	5											Number of groups	5											Number of groups	5											Number of groups	5
F (DFn, DFd)	208.6 (1, 508)	316.8 (1, 383)	167.5 (1, 368)	27.98 (1, 553)	15.66 (1, 463)		Kruskal-Wallis statistic	2.018											Kruskal-Wallis statistic	12.87											Kruskal-Wallis statistic	149.4											Kruskal-Wallis statistic	200.1
Slope unconstrained							Dunn's multiple comparisons test	Mean rank diff.	Significant?	Summary	Adjusted P Value	Mean rank 1	Mean rank 2	Mean rank diff.	n1	n2	Z		Dunn's multiple comparisons test	Mean rank diff.	Significant?	Summary	Adjusted P Value	Mean rank 1	Mean rank 2	Mean rank diff.	n1	n2	Z		Dunn's multiple comparisons test	Mean rank diff.	Significant?	Summary	Adjusted P Value	Mean rank 1	Mean rank 2	Mean rank diff.	n1	n2	Z		Dunn's multiple comparisons test	Mean rank diff.	Significant?	Summary	Adjusted P Value	Mean rank 1	Mean rank 2
Best-fit values							GtACR2 vs. GtACR1	-21.34	No	ns	>0.9999	214.9	236.2	-21.34	102	77	1.071		GtACR2 vs. GtACR1	-18.03	No	ns	>0.9999	204.4	222.4	-18.03	102	77	0.9048		GtACR2 vs. GtACR1	-23.01	No	ns	>0.9999	130.4	153.4	-23.01	102	77	1.162		GtACR2 vs. GtACR1	-1.003	No	ns	>0.9999	124.3	125.3
YIntercept	-0.5547	-0.5243	-0.2207	-0.2086	-0.08538		GtACR2 vs. ArchT	-22.51	No	ns	>0.9999	214.9	237.4	-22.51	102	74	1.117		GtACR2 vs. ArchT	-36.46	No	ns	0.7046	204.4	240.9	-36.46	102	74	1.809		GtACR2 vs. ArchT	-170	Yes	****	<0.0001	130.4	300.3	-170	102	74	8.484		GtACR2 vs. ArchT	-171.4	Yes	****	<0.0001	124.3	295.7
Slope	-0.384	-0.3513	-0.1463	-0.07389	-0.04714		GtACR2 vs. NpHR3.0	-10.79	No	ns	>0.9999	214.9	225.7	-10.79	102	111	0.5957		GtACR2 vs. NpHR3.0	-12.26	No	ns	>0.9999	204.4	216.7	-12.26	102	111	0.6771		GtACR2 vs. NpHR3.0	-121.2	Yes	****	<0.0001	130.4	251.5	-121.2	102	111	6.734		GtACR2 vs. NpHR3.0	-148.8	Yes	****	<0.0001	124.3	273.1
Goodness of Fit							GtACR2 vs. WT	-20.98	No	ns	>0.9999	214.9	235.8	-20.98	102	93	1.108		GtACR2 vs. WT	-62.25	Yes	*	0.01	204.4	266.7	-62.25	102	93	3.29		GtACR2 vs. WT	-185.8	Yes	****	<0.0001	130.4	316.1	-185.8	102	93	9.875		GtACR2 vs. WT	-199.7	Yes	****	<0.0001	124.3	324
Degrees of Freedom	508	383	368	553	463		GtACR1 vs. ArchT	-1.171	No	ns	>0.9999	236.2	237.4	-1.171	77	74	0.05447		GtACR1 vs. ArchT	-18.43	No	ns	>0.9999	222.4	240.9	-18.43	77	74	0.8577		GtACR1 vs. ArchT	-147	Yes	****	<0.0001	153.4	300.3	-147	77	74	6.881		GtACR1 vs. ArchT	-170.4	Yes	****	<0.0001	125.3	295.7
R squared	0.2911	0.4527	0.3128	0.04816	0.03271		GtACR1 vs. NpHR3.0	10.55	No	ns	>0.9999	236.2	225.7	10.55	77	111	0.5389		GtACR1 vs. NpHR3.0	5.77	No	ns	>0.9999	222.4	216.7	5.77	77	111	0.2948		GtACR1 vs. NpHR3.0	-98.16	Yes	****	<0.0001	153.4	251.5	-98.16	77	111	5.045		GtACR1 vs. NpHR3.0	-147.8	Yes	****	<0.0001	125.3	273.1
Sum of Squares	91.03	30.86	43.84	140.7	134.4		GtACR1 vs. WT	0.3583	No	ns	>0.9999	236.2	235.8	0.3583	77	93	0.01762		GtACR1 vs. WT	-44.23	No	ns	0.2966	222.4	266.7	-44.23	77	93	2.175		GtACR1 vs. WT	-162.8	Yes	****	<0.0001	153.4	316.1	-162.8	77	93	8.051		GtACR1 vs. WT	-198.7	Yes	****	<0.0001	125.3	324
Normality of Residuals							ArchT vs. NpHR3.0	11.72	No	ns	>0.9999	237.4	225.7	11.72	74	111	0.5916		ArchT vs. NpHR3.0	24.2	No	ns	>0.9999	240.9	216.7	24.2	74	111	1.222		ArchT vs. NpHR3.0	48.8	No	ns	0.132	300.3	251.5	48.8	74	111	2.478		ArchT vs. NpHR3.0	22.67	No	ns	>0.9999	295.7	273.1
D'Agostino-Pearson omnibus (K2)	453.9	152.7	154	166.5	118.8		ArchT vs. WT	1.529	No	ns	>0.9999	237.4	235.8	1.529	74	93	0.07435		ArchT vs. WT	-25.8	No	ns	>0.9999	240.9	266.7	-25.8	74	93	1.255		ArchT vs. WT	-15.79	No	ns	>0.9999	300.3	316.1	-15.79	74	93	0.7726		ArchT vs. WT	-28.3	No	ns	>0.9999	295.7	324
P value	<0.0001	<0.0001	<0.0001	<0.0001	<0.0001		NpHR3.0 vs. WT	-10.19	No	ns	>0.9999	225.7	235.8	-10.19	111	93	0.5492		NpHR3.0 vs. WT	-50	No	ns	0.0705	216.7	266.7	-50	111	93	2.694		NpHR3.0 vs. WT	-64.59	Yes	**	0.0046	251.5	316.1	-64.59	111	93	3.502		NpHR3.0 vs. WT	-50.97	Yes	*	0.0496	273.1	324
Passed normality test (alpha=0.05)?	No	No	No	No	No
P value summary	****	****	****	****	****
Test for homoscedasticity
Rs of predicted Y vs. |residual|	0.7358	0.6111	0.02414	-0.1668	-0.03774
P value (one tailed)	<0.0001	<0.0001	0.3217	<0.0001	0.2084
Passed (P > 0.05)?	No	No	Yes	No	Yes
Slope = 0
Best-fit values
YIntercept	-0.6069	-0.585	-0.3067	-0.2574	-0.1189
Slope	= 0.000	= 0.000	= 0.000	= 0.000	= 0.000
Goodness of Fit
Degrees of Freedom	509	384	369	554	464
R squared	1.998e-15	1.321e-14	-4.663e-15	-4.441e-16	-3.553e-15
Sum of Squares	128.4	56.4	63.79	147.8	138.9
Normality of Residuals
D'Agostino-Pearson omnibus (K2)	371.4	115.7	95.15	140.6	113.8
P value	<0.0001	<0.0001	<0.0001	<0.0001	<0.0001
Passed normality test (alpha=0.05)?	No	No	No	No	No
P value summary	****	****	****	****	****
Figure 6G
Irradiance-dependent modulation of coil rate during 'late LED On' - linear regression on log-log transformed data (590 nm, 10 s pulse duration)							Comparison of coil rate changes between opsins during 'late LED On' (590 nm, 10 s pulse duration, 0 μW/mm2)												Comparison of coil rate changes between opsins during 'late LED On' (590 nm, 10 s pulse duration, 0.06 μW/mm2)												Comparison of coil rate changes between opsins during 'late LED On' (590 nm, 10 s pulse duration, 2.20 μW/mm2)												Comparison of coil rate changes between opsins during 'late LED On' (590 nm, 10 s pulse duration, 15.9 μW/mm2)
Comparison of Fits							Kruskal-Wallis test												Kruskal-Wallis test												Kruskal-Wallis test												Kruskal-Wallis test
Null hypothesis	Slope = 0	Slope = 0	Slope = 0	Slope = 0	Slope = 0		P value	0.721											P value	0.108											P value	0.0004											P value	<0.0001
Alternative hypothesis	Slope unconstrained	Slope unconstrained	Slope unconstrained	Slope unconstrained	Slope unconstrained		Exact or approximate P value?	Approximate											Exact or approximate P value?	Approximate											Exact or approximate P value?	Approximate											Exact or approximate P value?	Approximate
P value	0.9044	<0.0001	<0.0001	<0.0001	<0.0001		P value summary	ns											P value summary	ns											P value summary	***											P value summary	****
Conclusion (alpha = 0.05)	Do not reject null hypothesis	Reject null hypothesis	Reject null hypothesis	Reject null hypothesis	Reject null hypothesis		Do the medians vary signif. (P < 0.05)?	No											Do the medians vary signif. (P < 0.05)?	No											Do the medians vary signif. (P < 0.05)?	Yes											Do the medians vary signif. (P < 0.05)?	Yes
Preferred model	Slope = 0	Slope unconstrained	Slope unconstrained	Slope unconstrained	Slope unconstrained		Number of groups	5											Number of groups	5											Number of groups	5											Number of groups	5
F (DFn, DFd)	0.01443 (1, 508)	297.8 (1, 383)	334.8 (1, 368)	268.1 (1, 553)	39.91 (1, 463)		Kruskal-Wallis statistic	2.08											Kruskal-Wallis statistic	7.587											Kruskal-Wallis statistic	20.65											Kruskal-Wallis statistic	81.43
Slope unconstrained							Dunn's multiple comparisons test	Mean rank diff.	Significant?	Summary	Adjusted P Value	Mean rank 1	Mean rank 2	Mean rank diff.	n1	n2	Z		Dunn's multiple comparisons test	Mean rank diff.	Significant?	Summary	Adjusted P Value	Mean rank 1	Mean rank 2	Mean rank diff.	n1	n2	Z		Dunn's multiple comparisons test	Mean rank diff.	Significant?	Summary	Adjusted P Value	Mean rank 1	Mean rank 2	Mean rank diff.	n1	n2	Z		Dunn's multiple comparisons test	Mean rank diff.	Significant?	Summary	Adjusted P Value	Mean rank 1	Mean rank 2
Best-fit values							GtACR2 vs. GtACR1	-25.4	No	ns	>0.9999	214.9	240.3	-25.4	102	77	1.275		GtACR2 vs. GtACR1	-30.53	No	ns	>0.9999	220.1	250.7	-30.53	102	77	1.532		GtACR2 vs. GtACR1	28.29	No	ns	>0.9999	221.6	193.3	28.29	102	77	1.42		GtACR2 vs. GtACR1	149	Yes	****	<0.0001	271.5	122.6
YIntercept	-0.1433	-0.3076	-0.2272	-0.2803	-0.1521		GtACR2 vs. ArchT	-23.12	No	ns	>0.9999	214.9	238	-23.12	102	74	1.147		GtACR2 vs. ArchT	-33.37	No	ns	0.9775	220.1	253.5	-33.37	102	74	1.656		GtACR2 vs. ArchT	-21.88	No	ns	>0.9999	221.6	243.5	-21.88	102	74	1.086		GtACR2 vs. ArchT	10.06	No	ns	>0.9999	271.5	261.5
Slope	-0.002242	-0.2258	-0.164	-0.1645	-0.06271		GtACR2 vs. NpHR3.0	-14.05	No	ns	>0.9999	214.9	229	-14.05	102	111	0.776		GtACR2 vs. NpHR3.0	10.49	No	ns	>0.9999	220.1	209.6	10.49	102	111	0.5796		GtACR2 vs. NpHR3.0	10.15	No	ns	>0.9999	221.6	211.5	10.15	102	111	0.5606		GtACR2 vs. NpHR3.0	68.03	Yes	**	0.0016	271.5	203.5
Goodness of Fit							GtACR2 vs. WT	-12.98	No	ns	>0.9999	214.9	227.9	-12.98	102	93	0.6859		GtACR2 vs. WT	-4.265	No	ns	>0.9999	220.1	224.4	-4.265	102	93	0.2254		GtACR2 vs. WT	-54.5	Yes	*	0.0397	221.6	276.1	-54.5	102	93	2.88		GtACR2 vs. WT	-3.472	No	ns	>0.9999	271.5	275
Degrees of Freedom	508	383	368	553	463		GtACR1 vs. ArchT	2.284	No	ns	>0.9999	240.3	238	2.284	77	74	0.1063		GtACR1 vs. ArchT	-2.844	No	ns	>0.9999	250.7	253.5	-2.844	77	74	0.1324		GtACR1 vs. ArchT	-50.17	No	ns	0.1952	193.3	243.5	-50.17	77	74	2.335		GtACR1 vs. ArchT	-138.9	Yes	****	<0.0001	122.6	261.5
R squared	2.84e-05	0.4374	0.4764	0.3265	0.07936		GtACR1 vs. NpHR3.0	11.35	No	ns	>0.9999	240.3	229	11.35	77	111	0.5798		GtACR1 vs. NpHR3.0	41.02	No	ns	0.3612	250.7	209.6	41.02	77	111	2.096		GtACR1 vs. NpHR3.0	-18.15	No	ns	>0.9999	193.3	211.5	-18.15	77	111	0.9271		GtACR1 vs. NpHR3.0	-80.96	Yes	***	0.0003	122.6	203.5
Sum of Squares	293.5	42.19	28.44	60.18	74.94		GtACR1 vs. WT	12.42	No	ns	>0.9999	240.3	227.9	12.42	77	93	0.6107		GtACR1 vs. WT	26.26	No	ns	>0.9999	250.7	224.4	26.26	77	93	1.291		GtACR1 vs. WT	-82.79	Yes	***	0.0005	193.3	276.1	-82.79	77	93	4.072		GtACR1 vs. WT	-152.5	Yes	****	<0.0001	122.6	275
Normality of Residuals							ArchT vs. NpHR3.0	9.068	No	ns	>0.9999	238	229	9.068	74	111	0.4577		ArchT vs. NpHR3.0	43.87	No	ns	0.2679	253.5	209.6	43.87	74	111	2.215		ArchT vs. NpHR3.0	32.03	No	ns	>0.9999	243.5	211.5	32.03	74	111	1.617		ArchT vs. NpHR3.0	57.96	Yes	*	0.0327	261.5	203.5
D'Agostino-Pearson omnibus (K2)	371.3	136.8	41.84	132.5	106.2		ArchT vs. WT	10.14	No	ns	>0.9999	238	227.9	10.14	74	93	0.493		ArchT vs. WT	29.11	No	ns	>0.9999	253.5	224.4	29.11	74	93	1.416		ArchT vs. WT	-32.62	No	ns	>0.9999	243.5	276.1	-32.62	74	93	1.587		ArchT vs. WT	-13.54	No	ns	>0.9999	261.5	275
P value	<0.0001	<0.0001	<0.0001	<0.0001	<0.0001		NpHR3.0 vs. WT	1.07	No	ns	>0.9999	229	227.9	1.07	111	93	0.05765		NpHR3.0 vs. WT	-14.76	No	ns	>0.9999	209.6	224.4	-14.76	111	93	0.7954		NpHR3.0 vs. WT	-64.65	Yes	**	0.0049	211.5	276.1	-64.65	111	93	3.485		NpHR3.0 vs. WT	-71.5	Yes	**	0.0011	203.5	275
Passed normality test (alpha=0.05)?	No	No	No	No	No
P value summary	****	****	****	****	****
Test for homoscedasticity
Rs of predicted Y vs. |residual|	-0.2029	0.2032	-0.09893	0.05779	-0.006676
P value (one tailed)	<0.0001	<0.0001	0.0286	0.087	0.4429
Passed (P > 0.05)?	No	No	No	Yes	Yes
Slope = 0
Best-fit values
YIntercept	-0.1453	-0.4149	-0.328	-0.3782	-0.1998
Slope	= 0.000	= 0.000	= 0.000	= 0.000	= 0.000
Goodness of Fit
Degrees of Freedom	509	384	369	554	464
R squared	-4.441e-16	-1.776e-15	7.772e-16	1.887e-15	1.443e-15
Sum of Squares	293.5	74.99	54.3	89.35	81.4
Normality of Residuals
D'Agostino-Pearson omnibus (K2)	370.2	57.97	18.52	62.92	70.6
P value	<0.0001	<0.0001	<0.0001	<0.0001	<0.0001
Passed normality test (alpha=0.05)?	No	No	No	No	No
P value summary	****	****	****	****	****
[truncated: 26 more columns]

## Sheet: Figure 7E-F
Figure 7E	GtACR2	GtACR1	eArch3.0	eNpHR3.0	WT
Irradiance-dependent modulation of bout rate during 'LED On' - linear regression on log-log transformed data (459 nm, 10 s pulse duration)							Comparison of bout rate changes between opsins during 'LED On' (459 nm, 10 s pulse duration, 0 mW/mm2)												Comparison of bout rate changes between opsins during 'LED On' (459 nm, 10 s pulse duration, 0.24 mW/mm2)												Comparison of bout rate changes between opsins during 'LED On' (459 nm, 10 s pulse duration, 1.31 mW/mm2)												Comparison of bout rate changes between opsins during 'LED On' (459 nm, 10 s pulse duration, 2.55 mW/mm2)
Comparison of Fits							Kruskal-Wallis test												Kruskal-Wallis test												Kruskal-Wallis test												Kruskal-Wallis test
Null hypothesis	Slope = 0	Slope = 0	Slope = 0	Slope = 0	Slope = 0		P value	0.9906											P value	<0.0001											P value	<0.0001											P value	<0.0001
Alternative hypothesis	Slope unconstrained	Slope unconstrained	Slope unconstrained	Slope unconstrained	Slope unconstrained		Exact or approximate P value?	Approximate											Exact or approximate P value?	Approximate											Exact or approximate P value?	Approximate											Exact or approximate P value?	Approximate
P value	0.0012	0.2584	0.5321	0.4541	0.2799		P value summary	ns											P value summary	****											P value summary	****											P value summary	****
Conclusion (alpha = 0.05)	Reject null hypothesis	Do not reject null hypothesis	Do not reject null hypothesis	Do not reject null hypothesis	Do not reject null hypothesis		Do the medians vary signif. (P < 0.05)?	No											Do the medians vary signif. (P < 0.05)?	Yes											Do the medians vary signif. (P < 0.05)?	Yes											Do the medians vary signif. (P < 0.05)?	Yes
Preferred model	Slope unconstrained	Slope = 0	Slope = 0	Slope = 0	Slope = 0		Number of groups	5											Number of groups	5											Number of groups	5											Number of groups	5
F (DFn, DFd)	11.84 (1, 46)	1.298 (1, 70)	0.3951 (1, 58)	0.5642 (1, 118)	1.186 (1, 70)		Kruskal-Wallis statistic	0.2876											Kruskal-Wallis statistic	50.45											Kruskal-Wallis statistic	43.71											Kruskal-Wallis statistic	46.24
Slope unconstrained							Dunn's multiple comparisons test	Mean rank diff.	Significant?	Summary	Adjusted P Value	Mean rank 1	Mean rank 2	Mean rank diff.	n1	n2	Z		Dunn's multiple comparisons test	Mean rank diff.	Significant?	Summary	Adjusted P Value	Mean rank 1	Mean rank 2	Mean rank diff.	n1	n2	Z		Dunn's multiple comparisons test	Mean rank diff.	Significant?	Summary	Adjusted P Value	Mean rank 1	Mean rank 2	Mean rank diff.	n1	n2	Z		Dunn's multiple comparisons test	Mean rank diff.	Significant?	Summary	Adjusted P Value	Mean rank 1	Mean rank 2
Best-fit values							GtACR2 vs. GtACR1	-2.635	No	ns	>0.9999	61.22	63.85	-2.635	16	24	0.2272		GtACR2 vs. GtACR1	-19.74	No	ns	0.8876	22.03	41.77	-19.74	16	24	1.702		GtACR2 vs. GtACR1	0.2396	No	ns	>0.9999	34.34	34.1	0.2396	16	24	0.02066		GtACR2 vs. GtACR1	9.385	No	ns	>0.9999	39.41	30.02
YIntercept	-0.1477	-0.135	-0.005402	0.126	0.1191		GtACR2 vs. ArchT	-4.381	No	ns	>0.9999	61.22	65.6	-4.381	16	20	0.3635		GtACR2 vs. ArchT	-33.17	No	ns	0.0593	22.03	55.2	-33.17	16	20	2.752		GtACR2 vs. ArchT	-23.21	No	ns	0.5419	34.34	57.55	-23.21	16	20	1.925		GtACR2 vs. ArchT	-17.14	No	ns	>0.9999	39.41	56.55
Slope	0.1611	-0.05778	0.03255	-0.02016	0.04182		GtACR2 vs. NpHR3.0	0.3438	No	ns	>0.9999	61.22	60.88	0.3438	16	40	0.03233		GtACR2 vs. NpHR3.0	-64.42	Yes	****	<0.0001	22.03	86.45	-64.42	16	40	6.06		GtACR2 vs. NpHR3.0	-45.88	Yes	***	0.0002	34.34	80.23	-45.88	16	40	4.316		GtACR2 vs. NpHR3.0	-42.44	Yes	***	0.0007	39.41	81.85
Goodness of Fit							GtACR2 vs. WT	-0.9063	No	ns	>0.9999	61.22	62.13	-0.9063	16	24	0.07813		GtACR2 vs. WT	-54.34	Yes	****	<0.0001	22.03	76.38	-54.34	16	24	4.686		GtACR2 vs. WT	-49.91	Yes	***	0.0002	34.34	84.25	-49.91	16	24	4.303		GtACR2 vs. WT	-43.68	Yes	**	0.0017	39.41	83.08
Degrees of Freedom	46	70	58	118	70		GtACR1 vs. ArchT	-1.746	No	ns	>0.9999	63.85	65.6	-1.746	24	20	0.1604		GtACR1 vs. ArchT	-13.43	No	ns	>0.9999	41.77	55.2	-13.43	24	20	1.234		GtACR1 vs. ArchT	-23.45	No	ns	0.3117	34.1	57.55	-23.45	24	20	2.155		GtACR1 vs. ArchT	-26.53	No	ns	0.1474	30.02	56.55
R squared	0.2047	0.01821	0.006766	0.004759	0.01666		GtACR1 vs. NpHR3.0	2.979	No	ns	>0.9999	63.85	60.88	2.979	24	40	0.3211		GtACR1 vs. NpHR3.0	-44.68	Yes	****	<0.0001	41.77	86.45	-44.68	24	40	4.815		GtACR1 vs. NpHR3.0	-46.12	Yes	****	<0.0001	34.1	80.23	-46.12	24	40	4.971		GtACR1 vs. NpHR3.0	-51.83	Yes	****	<0.0001	30.02	81.85
Sum of Squares	2.21	7.065	8.832	18.1	12.47		GtACR1 vs. WT	1.729	No	ns	>0.9999	63.85	62.13	1.729	24	24	0.1667		GtACR1 vs. WT	-34.6	Yes	**	0.0085	41.77	76.38	-34.6	24	24	3.336		GtACR1 vs. WT	-50.15	Yes	****	<0.0001	34.1	84.25	-50.15	24	24	4.834		GtACR1 vs. WT	-53.06	Yes	****	<0.0001	30.02	83.08
Normality of Residuals							ArchT vs. NpHR3.0	4.725	No	ns	>0.9999	65.6	60.88	4.725	20	40	0.4801		ArchT vs. NpHR3.0	-31.25	Yes	*	0.015	55.2	86.45	-31.25	20	40	3.175		ArchT vs. NpHR3.0	-22.68	No	ns	0.2122	57.55	80.23	-22.68	20	40	2.304		ArchT vs. NpHR3.0	-25.3	No	ns	0.1014	56.55	81.85
D'Agostino-Pearson omnibus (K2)	1.059	1.82	1.159	4.049	6.784		ArchT vs. WT	3.475	No	ns	>0.9999	65.6	62.13	3.475	20	24	0.3194		ArchT vs. WT	-21.18	No	ns	0.5163	55.2	76.38	-21.18	20	24	1.946		ArchT vs. WT	-26.7	No	ns	0.1413	57.55	84.25	-26.7	20	24	2.454		ArchT vs. WT	-26.53	No	ns	0.1473	56.55	83.08
P value	0.589	0.4026	0.5601	0.1321	0.0336		NpHR3.0 vs. WT	-1.25	No	ns	>0.9999	60.88	62.13	-1.25	40	24	0.1347		NpHR3.0 vs. WT	10.08	No	ns	>0.9999	86.45	76.38	10.08	40	24	1.086		NpHR3.0 vs. WT	-4.025	No	ns	>0.9999	80.23	84.25	-4.025	40	24	0.4338		NpHR3.0 vs. WT	-1.233	No	ns	>0.9999	81.85	83.08
Passed normality test (alpha=0.05)?	Yes	Yes	Yes	Yes	No
P value summary	ns	ns	ns	ns	*
Test for homoscedasticity
Rs of predicted Y vs. |residual|	0.188	0.005731	-0.1261	0.1202	-0.0221
P value (one tailed)	0.1004	0.4809	0.1684	0.0954	0.4269
Passed (P > 0.05)?	Yes	Yes	Yes	Yes	Yes
Slope = 0
Best-fit values
YIntercept	-0.1474	-0.1324	-0.006217	0.1267	0.1182
Slope	= 0.000	= 0.000	= 0.000	= 0.000	= 0.000
Goodness of Fit
Degrees of Freedom	47	71	59	119	71
R squared	-4.441e-16	0	-4.441e-16	1.332e-15	0
Sum of Squares	2.779	7.196	8.892	18.19	12.68
Normality of Residuals
D'Agostino-Pearson omnibus (K2)	2.701	2.328	1.459	3.659	8.293
P value	0.2592	0.3122	0.4822	0.1605	0.0158
Passed normality test (alpha=0.05)?	Yes	Yes	Yes	Yes	No
P value summary	ns	ns	ns	ns	*
Figure 7F
Irradiance-dependent modulation of bout rate during 'LED On' - linear regression on log-log transformed data (617 nm, 10 s pulse duration)							Comparison of bout rate changes between opsins during 'LED On' (617 nm, 10 s pulse duration, 0 mW/mm2)												Comparison of bout rate changes between opsins during 'LED On' (617 nm, 10 s pulse duration, 0.24 mW/mm2)												Comparison of bout rate changes between opsins during 'LED On' (617 nm, 10 s pulse duration, 0.63 mW/mm2)												Comparison of bout rate changes between opsins during 'LED On' (617 nm, 10 s pulse duration, 1 mW/mm2)
Comparison of Fits							Kruskal-Wallis test												Kruskal-Wallis test												Kruskal-Wallis test												Kruskal-Wallis test
Null hypothesis	Slope = 0	Slope = 0	Slope = 0	Slope = 0	Slope = 0		P value	0.9867											P value	0.1576											P value	0.0098											P value	<0.0001
Alternative hypothesis	Slope unconstrained	Slope unconstrained	Slope unconstrained	Slope unconstrained	Slope unconstrained		Exact or approximate P value?	Approximate											Exact or approximate P value?	Approximate											Exact or approximate P value?	Approximate											Exact or approximate P value?	Approximate
P value	0.4884	0.4185	0.9789	0.0016	0.6563		P value summary	ns											P value summary	ns											P value summary	**											P value summary	****
Conclusion (alpha = 0.05)	Do not reject null hypothesis	Do not reject null hypothesis	Do not reject null hypothesis	Reject null hypothesis	Do not reject null hypothesis		Do the medians vary signif. (P < 0.05)?	No											Do the medians vary signif. (P < 0.05)?	No											Do the medians vary signif. (P < 0.05)?	Yes											Do the medians vary signif. (P < 0.05)?	Yes
Preferred model	Slope = 0	Slope = 0	Slope = 0	Slope unconstrained	Slope = 0		Number of groups	5											Number of groups	5											Number of groups	5											Number of groups	5
F (DFn, DFd)	0.4879 (1, 46)	0.6623 (1, 70)	0.0007086 (1, 58)	10.39 (1, 118)	0.1998 (1, 70)		Kruskal-Wallis statistic	0.3452											Kruskal-Wallis statistic	6.616											Kruskal-Wallis statistic	13.33											Kruskal-Wallis statistic	27.71
Slope unconstrained							Dunn's multiple comparisons test	Mean rank diff.	Significant?	Summary	Adjusted P Value	Mean rank 1	Mean rank 2	Mean rank diff.	n1	n2	Z		Dunn's multiple comparisons test	Mean rank diff.	Significant?	Summary	Adjusted P Value	Mean rank 1	Mean rank 2	Mean rank diff.	n1	n2	Z		Dunn's multiple comparisons test	Mean rank diff.	Significant?	Summary	Adjusted P Value	Mean rank 1	Mean rank 2	Mean rank diff.	n1	n2	Z		Dunn's multiple comparisons test	Mean rank diff.	Significant?	Summary	Adjusted P Value	Mean rank 1	Mean rank 2
Best-fit values							GtACR2 vs. GtACR1	4.583	No	ns	>0.9999	65.13	60.54	4.583	16	24	0.3951		GtACR2 vs. GtACR1	-9.354	No	ns	>0.9999	59.06	68.42	-9.354	16	24	0.8065		GtACR2 vs. GtACR1	4.979	No	ns	>0.9999	74.56	69.58	4.979	16	24	0.4293		GtACR2 vs. GtACR1	7.021	No	ns	>0.9999	75.69	68.67
YIntercept	-0.01603	-0.06545	-0.04429	-0.2543	-0.04262		GtACR2 vs. ArchT	-0.375	No	ns	>0.9999	65.13	65.5	-0.375	16	20	0.03111		GtACR2 vs. ArchT	-12.29	No	ns	>0.9999	59.06	71.35	-12.29	16	20	1.019		GtACR2 vs. ArchT	8.013	No	ns	>0.9999	74.56	66.55	8.013	16	20	0.6648		GtACR2 vs. ArchT	-3.563	No	ns	>0.9999	75.69	79.25
Slope	0.1013	-0.05736	-0.00263	-0.2238	-0.02605		GtACR2 vs. NpHR3.0	3.875	No	ns	>0.9999	65.13	61.25	3.875	16	40	0.3645		GtACR2 vs. NpHR3.0	7.438	No	ns	>0.9999	59.06	51.63	7.438	16	40	0.6997		GtACR2 vs. NpHR3.0	28.81	No	ns	0.0672	74.56	45.75	28.81	16	40	2.711		GtACR2 vs. NpHR3.0	37.36	Yes	**	0.0044	75.69	38.33
Goodness of Fit							GtACR2 vs. WT	2.833	No	ns	>0.9999	65.13	62.29	2.833	16	24	0.2443		GtACR2 vs. WT	-10.56	No	ns	>0.9999	59.06	69.63	-10.56	16	24	0.9107		GtACR2 vs. WT	2.646	No	ns	>0.9999	74.56	71.92	2.646	16	24	0.2281		GtACR2 vs. WT	1.813	No	ns	>0.9999	75.69	73.88
Degrees of Freedom	46	70	58	118	70		GtACR1 vs. ArchT	-4.958	No	ns	>0.9999	60.54	65.5	-4.958	24	20	0.4557		GtACR1 vs. ArchT	-2.933	No	ns	>0.9999	68.42	71.35	-2.933	24	20	0.2696		GtACR1 vs. ArchT	3.033	No	ns	>0.9999	69.58	66.55	3.033	24	20	0.2788		GtACR1 vs. ArchT	-10.58	No	ns	>0.9999	68.67	79.25
R squared	0.01049	0.009373	1.222e-05	0.08095	0.002846		GtACR1 vs. NpHR3.0	-0.7083	No	ns	>0.9999	60.54	61.25	-0.7083	24	40	0.07633		GtACR1 vs. NpHR3.0	16.79	No	ns	0.7034	68.42	51.63	16.79	24	40	1.81		GtACR1 vs. NpHR3.0	23.83	No	ns	0.1021	69.58	45.75	23.83	24	40	2.569		GtACR1 vs. NpHR3.0	30.34	Yes	*	0.0108	68.67	38.33
Sum of Squares	13.21	7.167	9.514	10.63	5.147		GtACR1 vs. WT	-1.75	No	ns	>0.9999	60.54	62.29	-1.75	24	24	0.1687		GtACR1 vs. WT	-1.208	No	ns	>0.9999	68.42	69.63	-1.208	24	24	0.1165		GtACR1 vs. WT	-2.333	No	ns	>0.9999	69.58	71.92	-2.333	24	24	0.2249		GtACR1 vs. WT	-5.208	No	ns	>0.9999	68.67	73.88
Normality of Residuals							ArchT vs. NpHR3.0	4.25	No	ns	>0.9999	65.5	61.25	4.25	20	40	0.4318		ArchT vs. NpHR3.0	19.73	No	ns	0.4504	71.35	51.63	19.73	20	40	2.004		ArchT vs. NpHR3.0	20.8	No	ns	0.3455	66.55	45.75	20.8	20	40	2.114		ArchT vs. NpHR3.0	40.93	Yes	***	0.0003	79.25	38.33
D'Agostino-Pearson omnibus (K2)	6.807	1.05	5.575	15.25	0.0265		ArchT vs. WT	3.208	No	ns	>0.9999	65.5	62.29	3.208	20	24	0.2949		ArchT vs. WT	1.725	No	ns	>0.9999	71.35	69.63	1.725	20	24	0.1585		ArchT vs. WT	-5.367	No	ns	>0.9999	66.55	71.92	-5.367	20	24	0.4933		ArchT vs. WT	5.375	No	ns	>0.9999	79.25	73.88
P value	0.0333	0.5917	0.0616	0.0005	0.9868		NpHR3.0 vs. WT	-1.042	No	ns	>0.9999	61.25	62.29	-1.042	40	24	0.1123		NpHR3.0 vs. WT	-18	No	ns	0.5239	51.63	69.63	-18	40	24	1.94		NpHR3.0 vs. WT	-26.17	Yes	*	0.048	45.75	71.92	-26.17	40	24	2.82		NpHR3.0 vs. WT	-35.55	Yes	**	0.0013	38.33	73.88
Passed normality test (alpha=0.05)?	No	Yes	Yes	No	Yes
P value summary	*	ns	ns	***	ns
Test for homoscedasticity
Rs of predicted Y vs. |residual|	-0.04237	0.006549	-0.01886	-0.01857	0.004912
P value (one tailed)	0.3875	0.4782	0.4431	0.4202	0.4837
Passed (P > 0.05)?	Yes	Yes	Yes	Yes	Yes
Slope = 0
Best-fit values
YIntercept	-0.04297	-0.04951	-0.04357	-0.1892	-0.03545
Slope	= 0.000	= 0.000	= 0.000	= 0.000	= 0.000
Goodness of Fit
Degrees of Freedom	47	71	59	119	71
R squared	0	0	0	4.441e-16	0
Sum of Squares	13.35	7.235	9.515	11.56	5.161
Normality of Residuals
D'Agostino-Pearson omnibus (K2)	8.184	1.137	5.573	16.29	0.02461
P value	0.0167	0.5665	0.0616	0.0003	0.9878
Passed normality test (alpha=0.05)?	No	Yes	Yes	No	Yes
P value summary	*	ns	ns	***	ns
[truncated: 4 more columns]
