# Supplementary material for: A calibrated optogenetic toolbox of stable zebrafish opsin lines
Source: eLife. 2020 Mar 27;9:e54937. doi: 10.7554/eLife.54937 (PMC7170653; doi:10.7554/eLife.54937)
Supplement: Supplementary file 4. [file elife-54937-supp4.xlsx]

## Sheet: Sheet1
Opsin	Rig ID	Filterset	Cell N
Control	1	470/40	5
Control	1	550/25	4
Cheriff	1	470/40	3
CoChR	1	470/40	8
CoChR	2	480/40	4
ChR2	1	470/40	1
ChR2	2	480/40	8
Chronos	1	470/40	3
Chrimson	1	550/25	8
Chrimson	2	620/60	3
GtACR1	1	470/40	7
GtACR2	1	500/25	15
eArch3.0	2	540/25	3
eNpHR3.0	2	540/25	19
